# Supplementary material for: Highly (regio)selective hydroformylation of olefins using self-assembling phosphines
Source: Royal Society of Chemistry journal article supplement (doi:10.1039/d4ob00714j), 2024-01-01

## Highly (regio)selective hydroformylation of olefins using self-assembling phosphines

Pierre Fablet,<sup>a</sup> Maria Dolores Fernandez-Martinez,<sup>b</sup> Ralf Jackstell,<sup>a</sup> Anke Spannenberg,<sup>a</sup> Haijun Jiao<sup>a</sup> and Matthias Beller<sup>\*a</sup>

---

<sup>a</sup> Leibniz-Institut für Katalyse e.V. (LIKAT), Albert-Einstein-Straße 29a, 18059 Rostock, Germany. E-Mail: Ralf.Jackstell@catalysis.de, Matthias.Beller@catalysis.de

<sup>b</sup> Departament de Química Física i Inorgànica, Universitat Rovira i Virgili, C/Marcel·lí Domingo 1, 43007 Tarragona, Spain



## Supporting Information – Table of Contents

|       |                                                                                               |    |
|-------|-----------------------------------------------------------------------------------------------|----|
| SI-A: | <b>General information</b> .....                                                              | 4  |
| SI-B: | <b>General procedure for the synthesis of ligands L1-L7</b> .....                             | 5  |
| SI-C: | <b>NMR Spectra of the phosphine ligands (L1-L7)</b> .....                                     | 11 |
| SI-D: | <b>HR-MS (ESI) of the phosphine ligands (L1-L7)</b> .....                                     | 23 |
| SI-E: | <b>Single Crystal X-ray Diffraction (SC-XRD) of new phosphine ligands (L2,L3,L4,L5)</b> ..... | 37 |
| SI-F: | <b>General procedures for hydroformylation experiments</b> .....                              | 43 |
| a)    | <b>Influence of temperature</b> .....                                                         | 44 |
| b)    | <b>Variation of ligands</b> .....                                                             | 45 |
| c)    | <b>Ligand-Metal ratio influence</b> .....                                                     | 46 |
| d)    | <b>Influence of pressure</b> .....                                                            | 46 |
| e)    | <b>Solvent screening</b> .....                                                                | 47 |
| f)    | <b>Ligand screening in optimized conditions</b> .....                                         | 47 |
| SI-G: | <b>Kinetic profile and gas consumption experiments</b> .....                                  | 48 |
| SI-H: | <b>DFT and experimental IR spectra</b> .....                                                  | 56 |
| a)    | <b>Computational details</b> .....                                                            | 56 |
| b)    | <b>IR data</b> .....                                                                          | 74 |
| SI-I: | <b>Addendum to the scope : unreacted olefins</b> .....                                        | 79 |
| SI-J: | <b>NMR attribution and spectra of hydroformylation products</b> .....                         | 80 |

## SI-A: General information

Air- and moisture-sensitive syntheses were performed under argon atmosphere. Chemicals were purchased from Aldrich, TCI or ABCR. Unless otherwise noted, all commercial reagents were used without further purification.

Products were characterized by <sup>1</sup>H NMR, <sup>13</sup>C NMR, and HRMS spectroscopy. <sup>1</sup>H and <sup>13</sup>C NMR spectra were recorded on Bruker Avance 300 (300 MHz) or 400 (400M) NMR spectrometers. Chemical shifts  $\delta$  (ppm) are given relative to solvent: references for CDCl<sub>3</sub> were 7.26 ppm (<sup>1</sup>H-NMR) and 77.16 ppm (<sup>13</sup>C-NMR). <sup>13</sup>C-NMR spectra were acquired on a broad band decoupled mode. Multiplets were assigned as s (singlet), d (doublet), t (triplet), dd (doublet of doublet), dt (doublet of triplet), td (triplet of doublet), and m (multiplet).

For GC analyses, HP 6890 chromatograph with a 29 m HP5 column was used. Linear to branched ratios were determined by GC analysis of the crude reaction mixture.

ESI (electrospray ionization) high resolution mass spectra were recorded on an Agilent Technologies 6210 TOF.

Solid-state IR data were collected on a Bruker Alpha FT-IR-Spectrometer.

Data were collected on a Bruker Kappa APEX II Duo diffractometer. The structures were solved by intrinsic phasing (SHELXT: Sheldrick, G. M. *Acta Cryst.* **2015**, A71, 3.) and refined by full-matrix least-squares procedures on  $F^2$  (SHELXL-2019: Sheldrick, G. M. *Acta Cryst.* **2015**, C71, 3.). XP (Bruker AXS) was used for graphical representations.

## SI-B: General procedure for the synthesis of ligands L1-L7

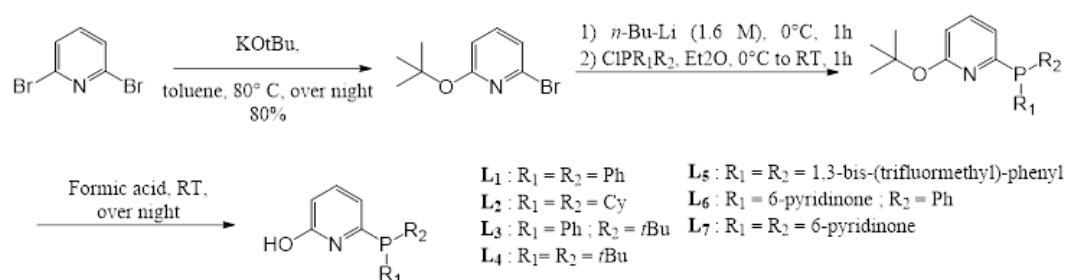

**Supplementary Figure 1.** General method for the synthesis of ligands L1-L7

### 2-tert-Butoxy-6-bromo-pyridine (b)

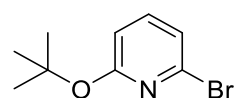

Synthesis was performed as previously reported by Breit et al. (*J. Am. Chem. Soc.* **2003**, 125, 6608-6609, *J. Am. Chem. Soc.* **2011**, 133, 964–975). To a solution of 10.00 g 2,6-dibromo-pyridine (42.21 mmol, 1.0 eq) in 100 ml toluene was added 7.11 g potassium-tert-butoxide (63.32 mmol, 1.2 eq). The mixture was heated at 80°C overnight. After this time, it was cooled to room temperature and was filtered through celite. The filtrate was concentrated in a rotary evaporator and distilled (110°C, reduced pressure). 2-Tert-butoxy-6-bromo-pyridine was obtained as colorless liquid. (7.77 g, 80%).

<sup>1</sup>H NMR (300 MHz, CDCl<sub>3</sub>, ppm) = 7.33 (t, J = 7.79 Hz, 1H), 6.97 (d, J = 7.55 Hz, 1H), 6.24 (d, J = 8.13 Hz, 1H), 1.58 (s, 9H).

### 6-Diphenylphosphanyl-1H-pyridin-2-one (6-DPPon) (L1)

Synthesis was performed as previously reported by Breit et al. (*J. Am. Chem. Soc.* **2003**, 125, 6608-6609, *J. Am. Chem. Soc.* **2011**, 133, 964–975). 2-Tert-butoxy-6-bromo-pyridine (0.52 ml, 3.04 mmol) was dissolved in 18 ml of Et<sub>2</sub>O and 1.6 M *n*-BuLi (2ml, 3.19 mmol) was added dropwise at 0°C. The mixture was stirred at 0°C 1 hour and then stirred at room temperature for 30 minutes. A solution of chlorodiphenylphosphine in 3 ml of Et<sub>2</sub>O was added at 0°C and reaction mixture was stirred an hour at room temperature. Then, 10ml of water was added, the organic phase was extracted with Et<sub>2</sub>O (4x6ml) and Na<sub>2</sub>SO<sub>4</sub> was added for drying. It was filtrated and evaporated. 2-Tert-butoxy-6-diphenylphosphanyl-pyridine was obtained as a yellow oil. <sup>1</sup>H NMR (300 MHz, CDCl<sub>3</sub>, ppm) 7.43-7.29 (m, 11H), 6.77 (ddd, J = 7.11, 3.11, 0.87 Hz, 1H), 6.50 (dt, J = 8.29, 0.73 Hz, 1H), 1.35 (s, 9H). <sup>31</sup>P (300 MHz, CDCl<sub>3</sub>, ppm) -2.62. This product was not isolated. It was dissolved in concentrated formic acid (11 ml) and stirred overnight at room temperature. After this time, distilled water (22 ml) was added. The organic phase was extracted with DCM (3 x 10ml). It was washed with a mixture of 1.5ml FA and 4.5ml of H<sub>2</sub>O and Na<sub>2</sub>SO<sub>4</sub> was added. Solution was filtrated via cannula and dried under vacuum giving a white solid/yellow oil. <sup>1</sup>H NMR (300 MHz, CDCl<sub>3</sub>, ppm) = 7.45-7.34 (m, 11H), 6.58 (d, J = 9.17, 1.10Hz, 1H), 6.21 (ddd, J = 6.76, 3.94, 1.09 Hz, 1H). <sup>31</sup>P (300 MHz, CDCl<sub>3</sub>, ppm) -8.99. It was recrystallized from acetone (5ml) and washed several times (4x5ml). Product was obtained as white crystals (520mg, 61%). In the washes there were more crystals, but they were not isolated.

$^1\text{H}$  NMR (300 MHz,  $\text{CDCl}_3$ , ppm) = 8.52 (s, 1H), 7.45-7.30 (m, 11H), 6.49 (ddd,  $J$  = 9.25, 1.08 0.47Hz, 1H), 6.27 (dt,  $J$  = 6.39, 1.13 Hz, 1H).  $^{13}\text{C}$  NMR (300 MHz,  $\text{CDCl}_3$ , ppm) = 163.97, 146.25, 140.26, 133.94, 132.80, 130.21, 129.31, 121.11, 113.54.  $^{31}\text{P}$  (300 MHz,  $\text{CDCl}_3$ , ppm) = -9.25 (100%). HR-MS (ESI-TOF) calculated for  $\text{C}_{17}\text{H}_{14}\text{PON}$  [M] 279.0813, found [M+H(1)]: 280.0891, [M+Na(23)]: 302.0705.

### 6-Dicyclohexylphosphanyl-1H-pyridin-2-one (L2)

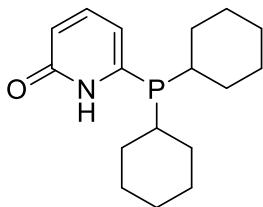

2-Tert-butoxy-6-bromo-pyridine (2.62 ml, 15.21 mmol) was dissolved in 40 ml of  $\text{Et}_2\text{O}$  and 1.6 M  $n\text{-BuLi}$  (9.98 ml, 15.97 mmol) was added dropwise at  $0^\circ\text{C}$ . The mixture was stirred at  $0^\circ\text{C}$  for 1 hour and after that time, it was stirred at room temperature for 30 minutes giving a yellow/orange suspension. A solution of chlorodicyclohexylphosphine in 10 ml of  $\text{Et}_2\text{O}$  was added at  $0^\circ\text{C}$  and stirred an hour at room temperature. Color turned orange/brown. Then, 30ml of water was added and the organic phase was extracted with  $\text{Et}_2\text{O}$  (3x20ml).  $\text{Na}_2\text{SO}_4$  was added and the suspension was washed with  $\text{Et}_2\text{O}$  (3x5ml). It was filtrated and evaporated. 2-Tert-butoxy-6-dicyclohexylphosphanyl-pyridine was obtained.  $^1\text{H}$  NMR (300 MHz,  $\text{CDCl}_3$ , ppm) = 7.40 (dt, 7.79, 2.39 Hz, 1H), 7.06 (s, broad signal, 1H), 6.53 (d,  $J$  = 8.26, 0.73 Hz, 1H), 1.60 (s, 9H),  $^{31}\text{P}$  (300 MHz,  $\text{CDCl}_3$ , ppm) = -8.38. This product was not isolated. It was dissolved in concentrated formic acid (56 ml) and stirred overnight at room temperature. After this time, distilled water (112 ml) was added. The organic phase was extracted with DCM (6 x 20ml). It was washed with a mixture of 3ml FA and 12ml of  $\text{H}_2\text{O}$  and  $\text{Na}_2\text{SO}_4$  was added. The solution was filtrated via cannula, dried over  $\text{Na}_2\text{SO}_4$  and filtrated again (DCM 2 x 5ml) and dried under vacuum.  $^1\text{H}$  NMR (300 MHz,  $\text{CDCl}_3$ , ppm) = 7.36 (dt,  $J$  = 6.58, 1.30Hz, 1H), 6.53 (td,  $J$  = 9.15, 1.05 Hz, 1H), 6.21 (dt,  $J$  = 6.31, 1.08 Hz, 1H).  $^{31}\text{P}$  (300 MHz,  $\text{CDCl}_3$ , ppm) = 3.77 (94%). It was recrystallized from acetone (10ml) and washed several times (5 x 5ml, 2 x 10ml). Product was obtained as a white powder (1.91 g, 43%). Washes from recrystallization were concentrated under vacuum and let overnight in the freezer. After this time, they were filtrated with a cannula and washed several times with cold acetone (2 x 10ml, 1 x 5ml). 0.68 g were obtained with a final yield of 58%.

$^1\text{H}$  NMR (300 MHz,  $\text{CDCl}_3$ , ppm) = 9.84 (s, 1H), 7.35 (dd,  $J$  = 7.94, 1.44Hz 1H), 6.55 (td,  $J$  = 9.23, 1.11Hz, 1H), 6.38 (dt,  $J$  = 6.27, 1.13 Hz, 1H).  $^{13}\text{C}$  NMR = (300 MHz,  $\text{CDCl}_3$ , ppm) = 164.93, 145.87, 140.09, 121.29, 115.41, 32.55, 30.33, 29.39, 27.03, 26.82, 26.27, 113.54.  $^{31}\text{P}$  = (300 MHz,  $\text{CDCl}_3$ , ppm) 3.58. HR-MS (ESI-TOF) calculated for  $\text{C}_{17}\text{H}_{26}\text{PON}$  [M] 291.1752, found [M+H(1)]: 292.1830, [M+Na(23)]: 314.1644.

### 6-(tert-Butyl)-phenylphosphanyl-1H-pyridin-2-one (L3)

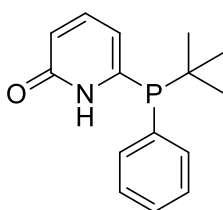

2-Tert-butoxy-6-bromo-pyridine (1.87ml, 10.86 mmol) was dissolved in 27 ml of  $\text{Et}_2\text{O}$  and 1.6 M  $n\text{-BuLi}$  (7.13 ml, 11.41 mmol) was added dropwise at  $0^\circ\text{C}$ . The mixture was stirred at  $0^\circ\text{C}$  for 1 hour and after that time, it was stirred at room

temperature for 30 minutes. A solution of (tert-butyl)-chloro-phenylphosphine (2.15 ml, 11.41 mmol) in 6 ml of Et<sub>2</sub>O was added at 0°C and stirred an hour at room temperature. Then, 19ml of water was added and the organic phase was extracted with Et<sub>2</sub>O (3 x 15ml), Na<sub>2</sub>SO<sub>4</sub> was added (washed with 2 x 5 ml of Et<sub>2</sub>O) and it was filtrated and evaporated giving a yellow oil. 2-Tert-butoxy-6-(tert-butyl)-phenylphosphanyl-pyridine was obtained. <sup>1</sup>H NMR (300 MHz, CDCl<sub>3</sub>, ppm) 7.66 (dt, J = 7.54, 1.69Hz, 1H), 7.43-7.29 (m, 5H), 7.03 (t, J = 5.99Hz, 1H), 6.53 (d, J = 8.40Hz, 1H), 1.60 (s, 9H). <sup>31</sup>P (300 MHz, CDCl<sub>3</sub>, ppm) = 18.95. This product was no isolated. It was dissolved in concentrated formic acid (40 ml) and stirred overnight at room temperature. After this time, distilled water (80 ml) was added. The organic phase was extracted with DCM (4 x 20ml). It was washed with a mixture of 2.5 ml FA and 10 ml of H<sub>2</sub>O and Na<sub>2</sub>SO<sub>4</sub> was added. The solution was filtrated via cannula and dried over Na<sub>2</sub>SO<sub>4</sub> then under vacuum. <sup>1</sup>H NMR (300 MHz, CDCl<sub>3</sub>, ppm) = 7.62-7.55 (m, 2H), 7.48-7.38 (m, 4H), 6.61-6.55 (m, 2H). <sup>31</sup>P (300 MHz, CDCl<sub>3</sub>, ppm) = 14.57. It was recrystallized from acetone (5ml) and washed several times (4x5ml). Product was obtained as a white powder (1.23mg, 32%). Washes were concentrated and let in the freezer overnight. After that, they were filtered and washed several times with cold acetone giving 0.500 g (total yield of 61%).

<sup>1</sup>H NMR (300 MHz, CDCl<sub>3</sub>, ppm) = 9.05 (s, 1H), 7.60-7.52 (m, 2H), 7.43-7.37 (m, 3H), 7.33 (dt, J = 8.06, 2.05 Hz, 1H), 6.49-6.42 (m, 2H). <sup>13</sup>C NMR = (300 MHz, CDCl<sub>3</sub>, ppm) = 163.71, 146.41, 140.08, 135.02, 131.97, 130.30, 129.14, 120.68, 113.44, 31.78, 28.68. <sup>31</sup>P = (300 MHz, CDCl<sub>3</sub>, ppm) 14.51 (100%). HR-MS (ESI-TOF) calculated for C<sub>15</sub>H<sub>18</sub>PON [M] 259.1126, found [M+H(1)]: 260.1204, [M+Na(23)]: 282.1018.

#### 6-Di-tert-butylphosphanyl-1H-pyridin-2-one (L4)

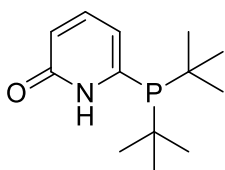

2-Tert-butoxy-6-bromo-pyridine (1.80ml, 10.44 mmol) was dissolved in 30 ml of Et<sub>2</sub>O and 1.6 M *n*-BuLi (6.85 ml, 10.96 mmol) was added dropwise at 0°C. The mixture was stirred at 0°C for 1 hour and after that time, it was stirred at room temperature for 30 minutes. A solution of di-tert-butylchlorophosphine in 4 ml of Et<sub>2</sub>O was added at 0°C and stirred an hour at room temperature. Then, 15ml of water were added and the organic phase was extracted with Et<sub>2</sub>O (3x10ml, 1x5ml). Na<sub>2</sub>SO<sub>4</sub> was added and the suspension was filtrated and evaporated. 2-Tert-butoxy-6-di-tert-butyl-phosphanyl-pyridine was obtained. <sup>1</sup>H NMR (400 MHz, CDCl<sub>3</sub>, ppm) = 7.41 (dt, J = 7.72, 2.28Hz, 1H), 7.20 (dt, J = 8.15, 0.87Hz, 1H), 6.58 (td, J = 8.33, 1.17Hz, 1H), 1.59 (s, 9H), 1.25 (s, 9H), 1.22 (s, 9H). <sup>31</sup>P (400 MHz, CDCl<sub>3</sub>, ppm) = 42.34. This product was no isolated. It was dissolved in concentrated formic acid (15 ml) and stirred overnight at room temperature. After this time, distilled water (30 ml) was added. The organic phase was extracted with DCM (4 x 10ml). It was washed with a mixture of 3 ml FA and 12 ml of H<sub>2</sub>O and Na<sub>2</sub>SO<sub>4</sub> was added. The solution was filtrated via cannula and washed Na<sub>2</sub>SO<sub>4</sub> (2x5ml of DCM) and dry under vacuum giving a yellow oil.

<sup>1</sup>H NMR (300 MHz, CDCl<sub>3</sub>, ppm) = 7.49 (dd, J = 9.14, 0.83Hz, 1H), 6.72 (dt, J = 8.15, 2.60, 0.98Hz, 1H), 6.66 (td, J = 9.10, 1.10Hz, 1H), 1.26 (s, 9H), 1.21 (s, 9H). <sup>31</sup>P (300 MHz, CDCl<sub>3</sub>, ppm) = 38.13. This product was distilled under vacuum (0.002 bar) at 110-120 °C. It crystallized in the top part of the distillation Schlenk as colorless to white crystals. At the bottom, an orange/yellow oil was obtained. Then, this oil was washed away with DCM several times and the white crystals were dried under vacuum. 1.39 g were obtained giving a yield of 56%.

<sup>1</sup>H NMR (300 MHz, CDCl<sub>3</sub>, ppm) = 9.13 (s, 1H), 7.34 (m, 1H), 6.58-6.47 (m, 2H), 1.23 (s, 9H), 1.19 (s, 9H). <sup>13</sup>C NMR = (300 MHz, CDCl<sub>3</sub>, ppm) = 163.51, 146.51, 140.05, 121.83, 115.29, 32.77, 30.26. <sup>31</sup>P = (300 MHz, CDCl<sub>3</sub>, ppm) = 38.28. HR-MS (ESI-TOF) calculated for C<sub>13</sub>H<sub>22</sub>PON [M] 239.1439, found [M+H(1)]: 240.1517.

### 6-Bis-(3,5-di-(trifluoromethyl)-phenylphosphanyl)-1H-pyridin-2-one (L5)

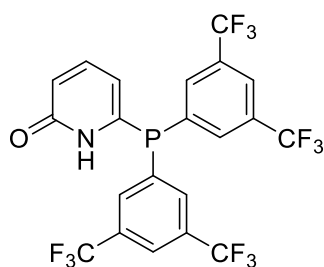

Synthesis was performed as previously reported by Breit et al. (*Chem. Sci.*, **2013**, 4, 2418–2422). 2-Tert-butoxy-6-bromo-pyridine (0.37 ml, 2.17 mmol) was dissolved in 18 ml of Et<sub>2</sub>O and 1.6 M *n*-BuLi (1.43 ml, 2.28 mmol) was added dropwise at 0°C. The mixture was stirred at 0°C for 1 hour and after that time, it was stirred at room temperature for 30 minutes giving an orange suspension. A solution of bis-(3,5-di-(trifluoromethyl)-phenyl)-chlorophosphine (1.12 g, 2.28 mmol) in 2 ml of Et<sub>2</sub>O was added at -78°C and stirred an hour at room temperature. Color turned dark purple/brown. Then, 10ml of water were added and the organic phase was extracted with Et<sub>2</sub>O (7 x 10 ml), Na<sub>2</sub>SO<sub>4</sub> was added and the suspension was washed with Et<sub>2</sub>O (2 x 10 ml). It was filtrated and evaporated. 2-Tert-butoxy-6-bis-(3,5-di-(trifluoromethyl)-phenylphosphanyl)-pyridine was obtained as brownish solid/oil. <sup>1</sup>H NMR (300 MHz, CDCl<sub>3</sub>, ppm) = 7.90-7.77 (m, 3H), 7.55 (ddd, J = 9.36, 3.09, 1.26 Hz, 1H), 7.18 (dt, J = 7.33, 0.82, 0.74 Hz, 1H), 6.66 (qd, J = 8.51, 1.01, 0.44 Hz, 1H), 1.27 (s, 9H). <sup>31</sup>P (300 MHz, CDCl<sub>3</sub>, ppm) = 2.46. This product was not isolated. It was dissolved in concentrated formic acid (8 ml) and stirred overnight at room temperature. After this time, distilled water (16 ml) was added. The organic phase was extracted with DCM (7 x 10 ml). It was washed with a mixture of 1 ml FA and 4 ml of H<sub>2</sub>O and Na<sub>2</sub>SO<sub>4</sub> was added. The solution was filtrated via cannula, dried over Na<sub>2</sub>SO<sub>4</sub> and filtrated again (DCM 3 x 5 ml) and dried further under vacuum. <sup>1</sup>H NMR (300 MHz, CDCl<sub>3</sub>, ppm) = 7.94-7.86 (m, 3H), 7.42 (td, J = 8.11, 2.52, 1.86 Hz, 1H), 6.50-6.42 (m, 2H). <sup>31</sup>P (300 MHz, CDCl<sub>3</sub>, ppm) = -7.51. It was recrystallized from acetone (6 ml) and washed several times (4 x 2 ml, 1 x 1 ml). Product was obtained as a white powder (0.300 g). Washes from recrystallization were concentrated under vacuum and let overnight in the freezer. After this time, they were filtrated with a cannula and washed several times with cold acetone (3 x 5 ml) and recrystallized again. An additional 0.270 g were obtained with a final yield of 64%.

<sup>1</sup>H NMR (300 MHz, CDCl<sub>3</sub>, ppm) = 12.74 (s, 1H), 7.95-7.88 (m, 3H), 7.34 (td, J = 7.86, 2.46, 2.33 Hz 1H), 6.43 (ddd, J = 7.71, 1.12, 1.04 Hz, 1H), 6.24 (dt, J = 9.28, 1.08 Hz, 1H). <sup>13</sup>C NMR = (300 MHz, CDCl<sub>3</sub>, ppm) = 165.24, 142.61, 142.28, 140.29, 140.14, 136.15, 135.95, 133.73, 133.45, 133.04, 132.95, 132.60, 132.51, 132.15, 132.06, 131.70, 131.61, 123.98 (<sup>13</sup>C-<sup>19</sup>F : 124.08, 124.03, 123.93, 123.88) 122.91, 121.07 (<sup>13</sup>C-<sup>19</sup>F : 128.31, 124.69, 117.45, 116.77), 116.35, 77.43, 77.21, 77.01, 76.58. <sup>31</sup>P = (300 MHz, CDCl<sub>3</sub>, ppm) = -7.13. HR-MS (EI) calculated for C<sub>21</sub>H<sub>10</sub>NF<sub>12</sub>PON [M] 551.03029, found [M]: 551.03032.

### 6,6'-(phenylphosphanediyl)bis(pyridin-2(1H)-one) (L6)

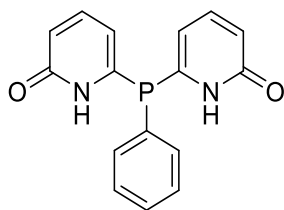

2-Tert-butoxy-6-bromo-pyridine (0.75ml, 4.35mmol) was dissolved in 30 ml of Et<sub>2</sub>O and 1.6 M *n*-BuLi (2.85 ml, 4.56 mmol) was added dropwise at 0°C. The mixture was stirred at 0°C for 1 hour and after that time, it was stirred at room temperature for 30 minutes. A solution of dichlorophenylphosphine in 4 ml of Et<sub>2</sub>O was added at 0°C and stirred 1 hour at room temperature. Then, 20ml of water were added and the organic phase was extracted with Et<sub>2</sub>O (3x10ml), Na<sub>2</sub>SO<sub>4</sub> was added, and it was filtrated and evaporated. 2-Tert-butoxy-6,6'-(phenylphosphanylyl)bis-pyridine was obtained. <sup>1</sup>H NMR (300 MHz, CDCl<sub>3</sub>, ppm) 7.54-7.46 (m, 2H), 7.39 (ddd, J = 7.74, 2.64, 1.12Hz, 2H), 7.36-7.30 (m, 3H), 6.86 (dd, J = 3.28, 0.87Hz, 1H), 6.48 (dt, J = 8.35, 0.79Hz, H), 1.33 (s, 18H). <sup>31</sup>P (300 MHz, CDCl<sub>3</sub>, ppm) = 0.31. It was dissolved in concentrated formic acid (15 ml) and stirred overnight at room temperature. After this time, distilled water (30 ml) was added, and formation of a precipitate occurred. Complete evaporation was carried out under vacuum (at 50°C), MeOH was added (3x2ml) and evaporated every time. Then, the compound was redispersed in 15 ml of MeOH and filtered through a frit. It was washed several times (1x10 ml, 2x5ml) and dried under vacuum. Off-white powder was obtained (480 mg, 75%).

<sup>1</sup>H NMR (300 MHz, DMSO, ppm) = 11.80 (s, 2H), 7.59-7.34 (m, 7H), 6.38 (br s, 2H), 5.88 (br s, 2H). <sup>31</sup>P (300 MHz, DMSO, ppm) = -15.05, broad signal. <sup>13</sup>C NMR = (400 MHz, DMSO, ppm) = 163.18, 146.77, 140.02, 134.21, 131.19, 130.45, 129.20, 119.20, 113.09. HR-MS (ESI-TOF) calculated for C<sub>16</sub>H<sub>13</sub>PO<sub>2</sub>N<sub>2</sub> [M] 296.0715, found [M+H(1)]: 297.0793, [M+Na(23)]: 319.0607.

### 6,6',6''-phosphanetriyltris(pyridin-2(1H)-one) (L7)

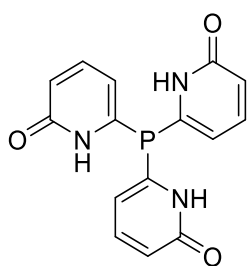

2-Tert-butoxy-6-bromo-pyridine (0.37 ml, 2.17 mmol) was dissolved in 18 ml of Et<sub>2</sub>O and 1.6 M *n*-BuLi (1.43 ml, 2.28 mmol) was added dropwise at 0°C. The mixture was stirred at 0°C for 1 hour and after that time, it was stirred at room temperature for 30 minutes. A solution of trichlorophosphine in 2 ml of Et<sub>2</sub>O was added at 0°C and stirred an hour at room temperature. Then, 10 ml of water were added, and the organic phase was extracted with Et<sub>2</sub>O (3 x 10ml), Na<sub>2</sub>SO<sub>4</sub> was added, and it was filtrated and the solution was evaporated. 2-Tert-butoxy-6,6',6''-phosphanetriyltris-pyridine was obtained. <sup>1</sup>H NMR (400 MHz, CDCl<sub>3</sub>, ppm) = 7.40 (ddd, J = 6.67, 2.52, 1.09 Hz, 3H), 6.90 (ddd, J = 7.29, 2.67, 1.12 Hz, 3H), 1.35 (s, 21H). <sup>31</sup>P (400 MHz, CDCl<sub>3</sub>, ppm) = 3.14. It was dissolved in concentrated formic acid (8 ml) and stirred overnight at room temperature. After this time, distilled water (16 ml) was added, and formation of a precipitate occurred. Complete evaporation was carried out under vacuum (at 50°C), MeOH was added (3 x 2ml) and evaporated every time. Then, the compound was redispersed in 10 ml of MeOH and filtered through a frit. It was washed several times (3 x 2ml) and dried under vacuum. Off-white powder was obtained (120 mg, 53%).

$^1\text{H}$  NMR (300 MHz, DMSO, ppm) = 11.79 (s, 3H), 7.48 (br s, 3H), 6.46 (d,  $J$  = 8.74, 3H), 6.18 (br s, 3H).  $^{31}\text{P}$  (300 MHz, DMSO, ppm) = -18.04, broad signal.  $^{13}\text{C}$  NMR = (400 MHz, DMSO, ppm) = 163.62, 145.63, 140.61, 119.78, 115.21. HR-MS (ESI-TOF) calculated for  $\text{C}_{15}\text{H}_{12}\text{PO}_3\text{N}_3$  [M] 313.0616, found [M+H(1)]: 314.0694, [M+Na(23)]: 336.

## SI-C: NMR Spectra of the phosphine ligands (L1-L7)

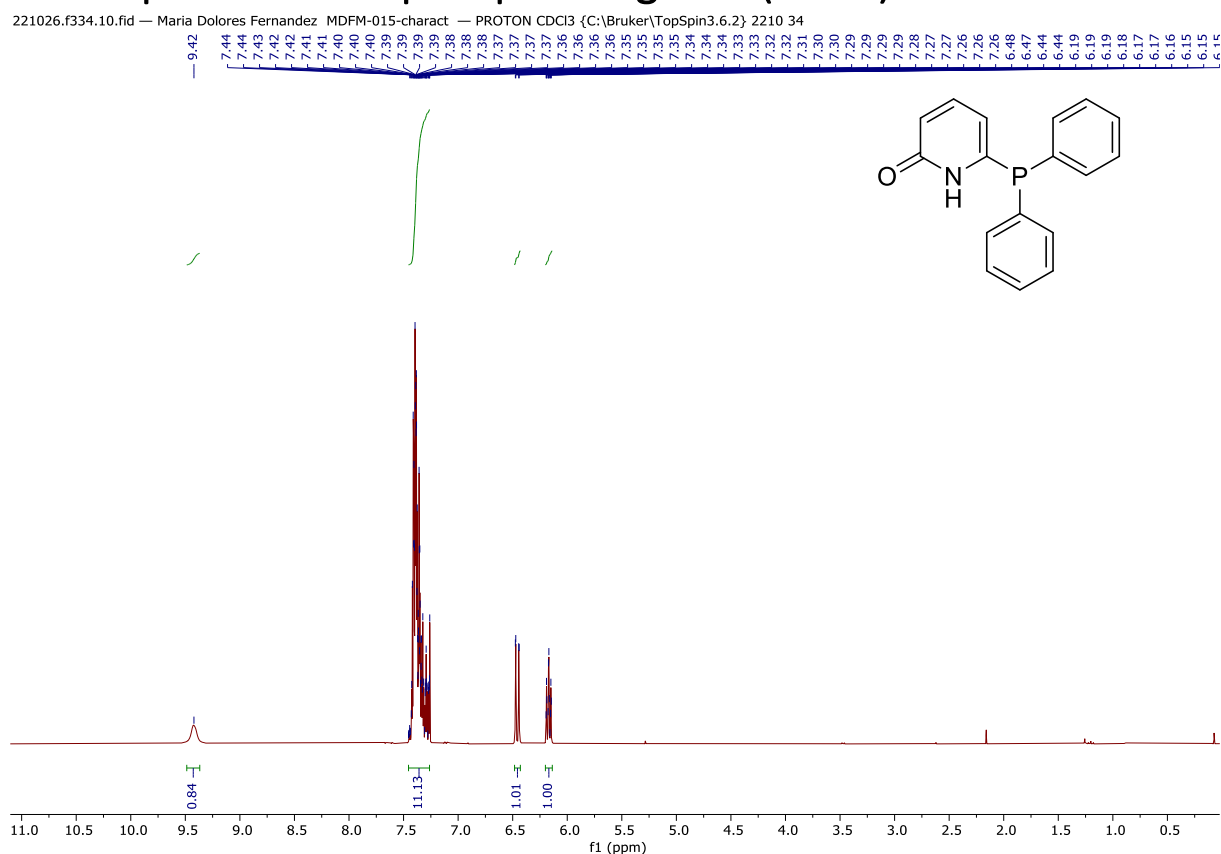

Supplementary Figure 2. <sup>1</sup>H NMR spectrum of L1 in CDCl<sub>3</sub> at RT and AP.

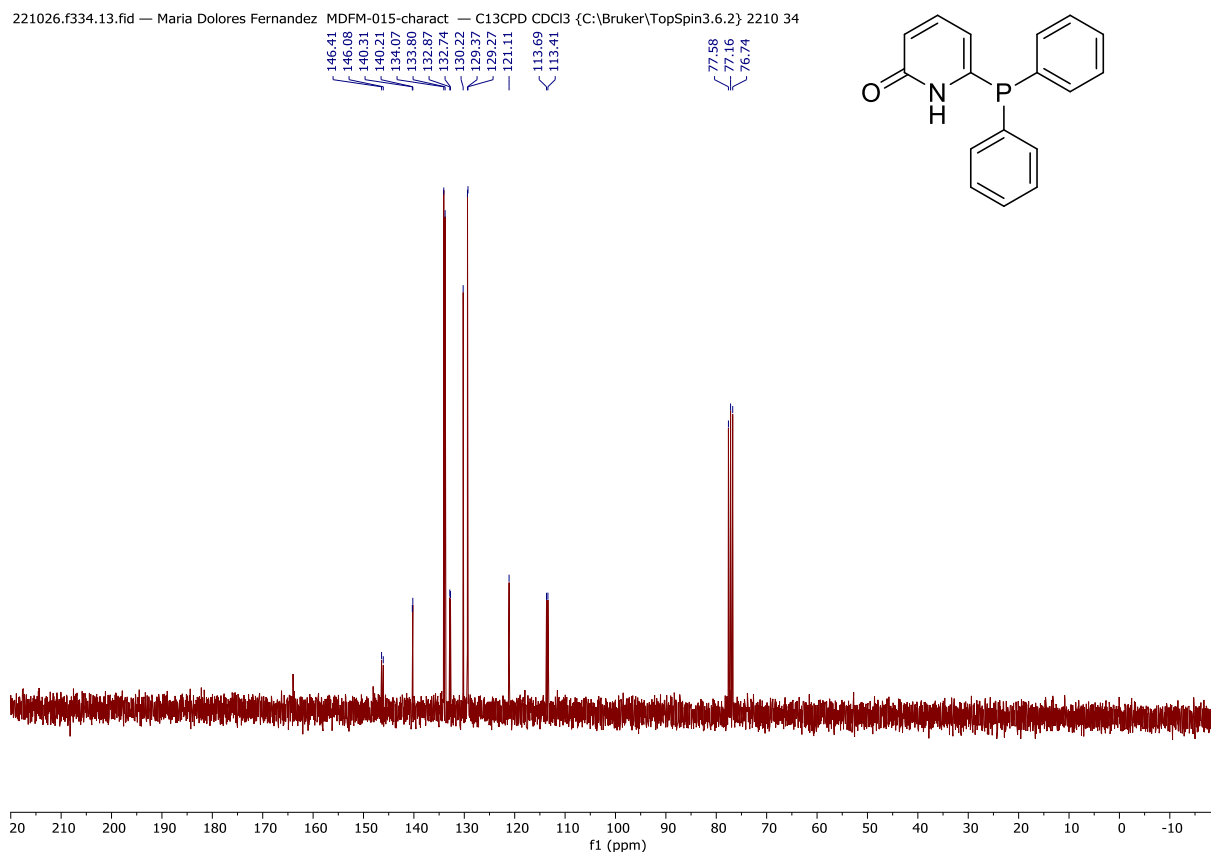

Supplementary Figure 3. <sup>13</sup>C NMR spectrum of L1 in CDCl<sub>3</sub> at RT and AP.

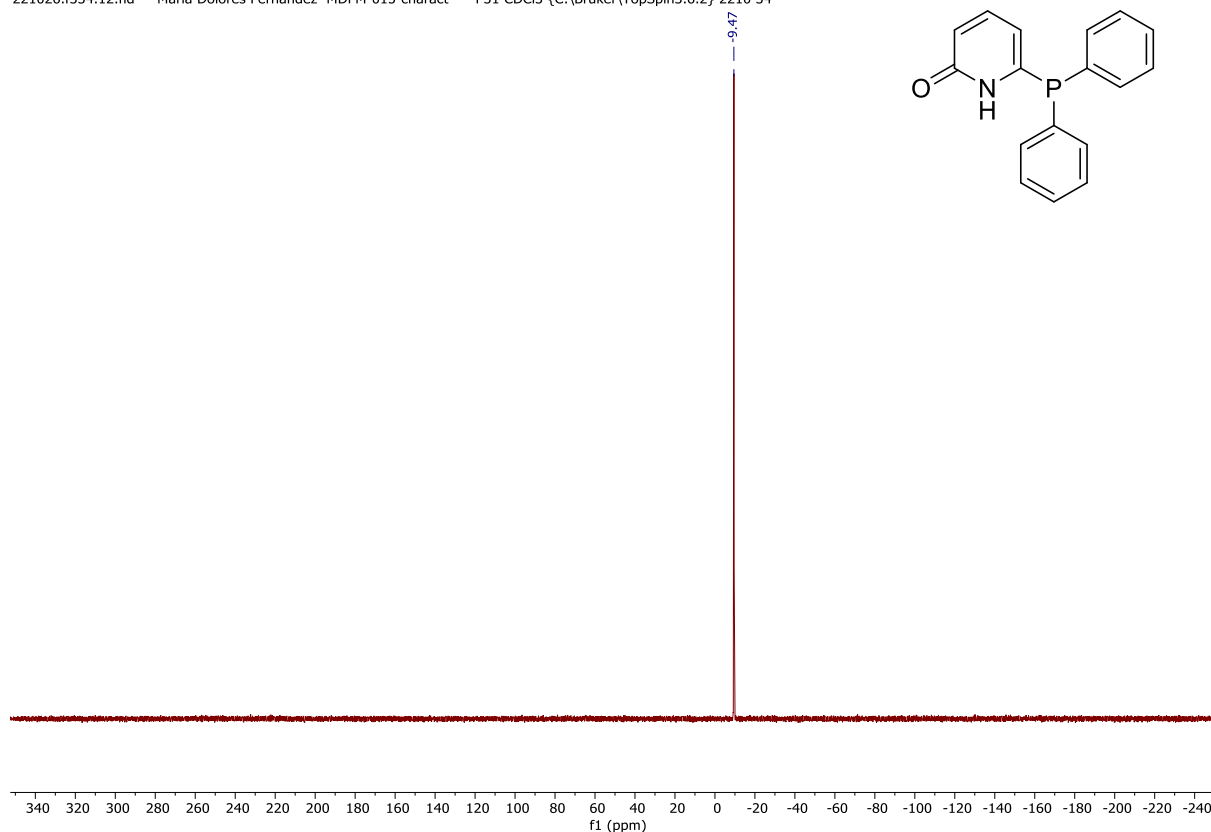

**Supplementary Figure 4. <sup>31</sup>P NMR spectrum of L1 in CDCl<sub>3</sub> at RT and AP.**

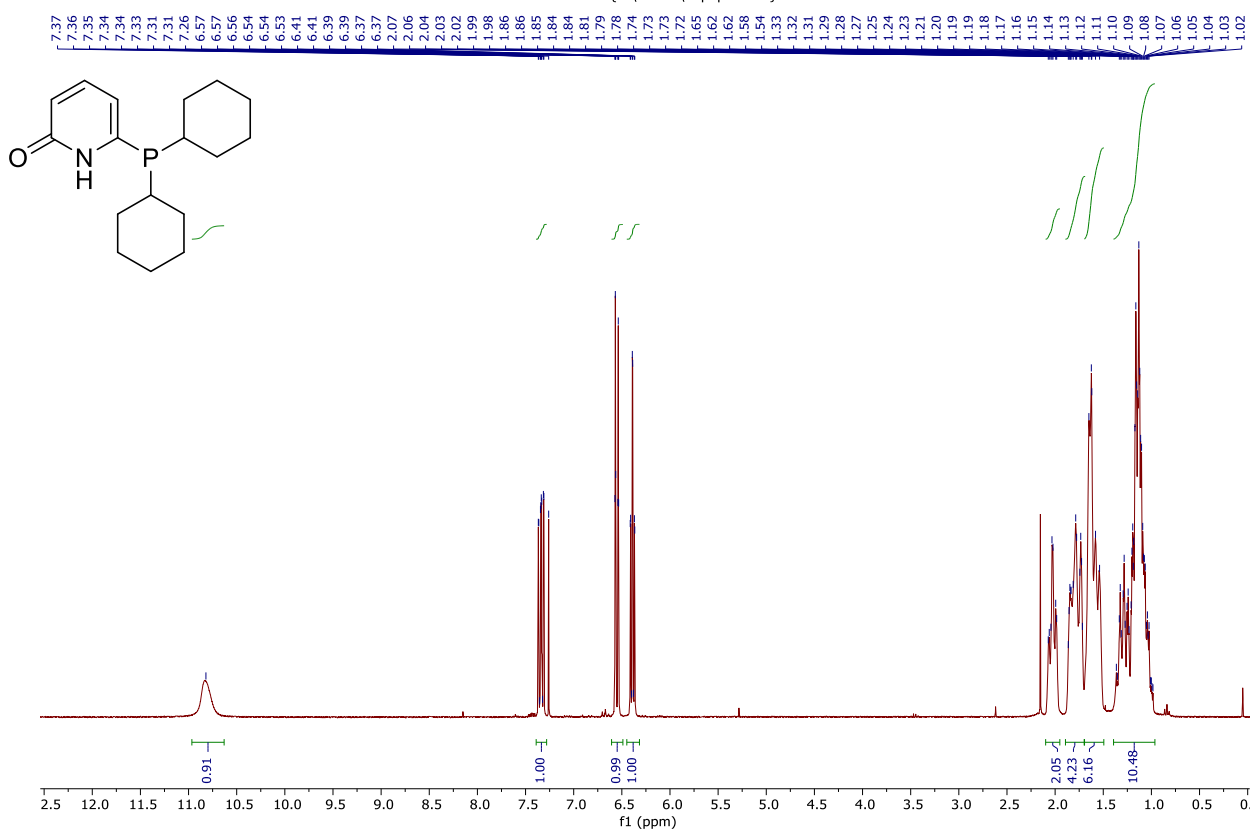

**Supplementary Figure 5. <sup>1</sup>H NMR spectrum of L2 in CDCl<sub>3</sub> at RT and AP.**

221026.f323.13.fid — Maria Dolores Fernandez MDFM-014-charact — C13CPD CDCl3 {C:\Bruker\TopSpin3.6.2} 2210 23

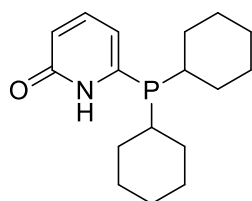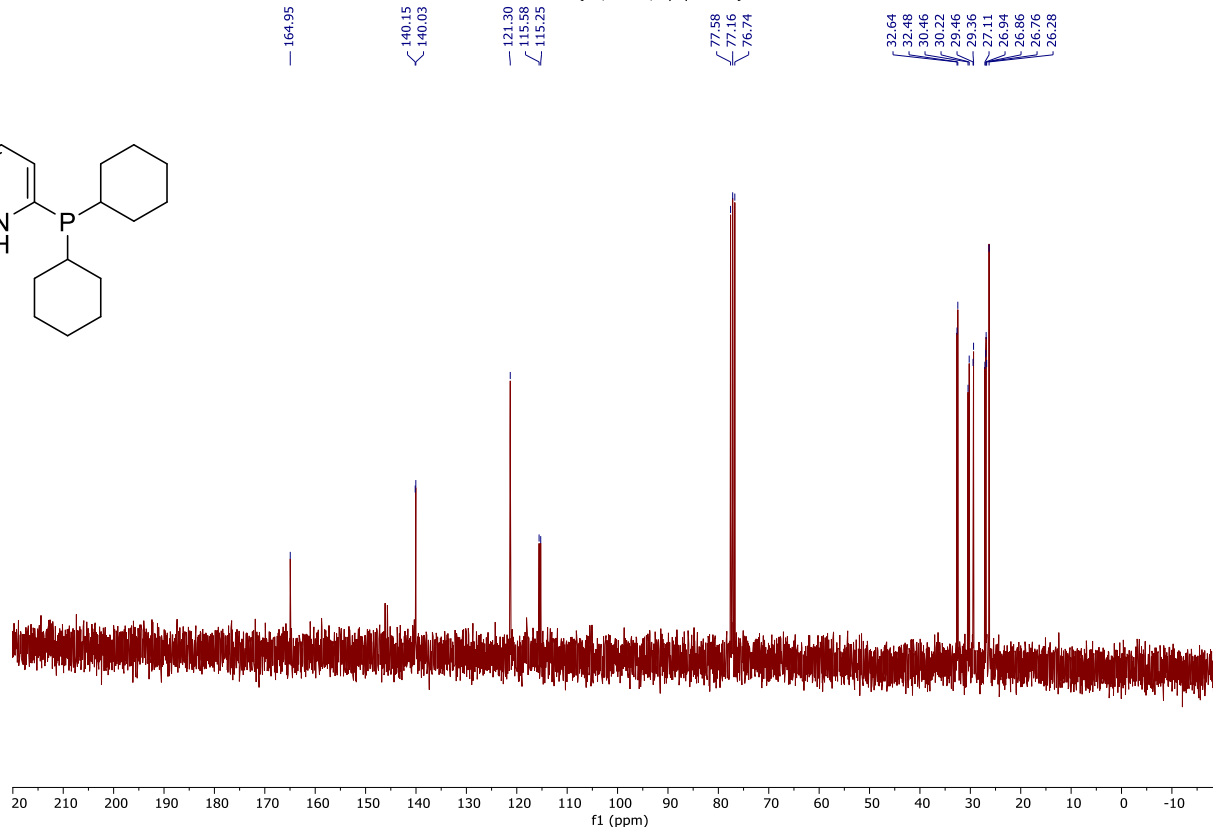

**Supplementary Figure 6.  $^{13}\text{C}$  NMR spectrum of L2 in  $\text{CDCl}_3$  at RT and AP.**

221026.f323.12.fid — Maria Dolores Fernandez MDFM-014-charact — P31 CDCl3 {C:\Bruker\TopSpin3.6.2} 2210 23

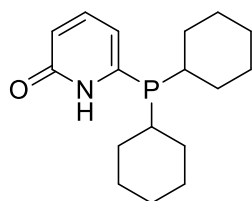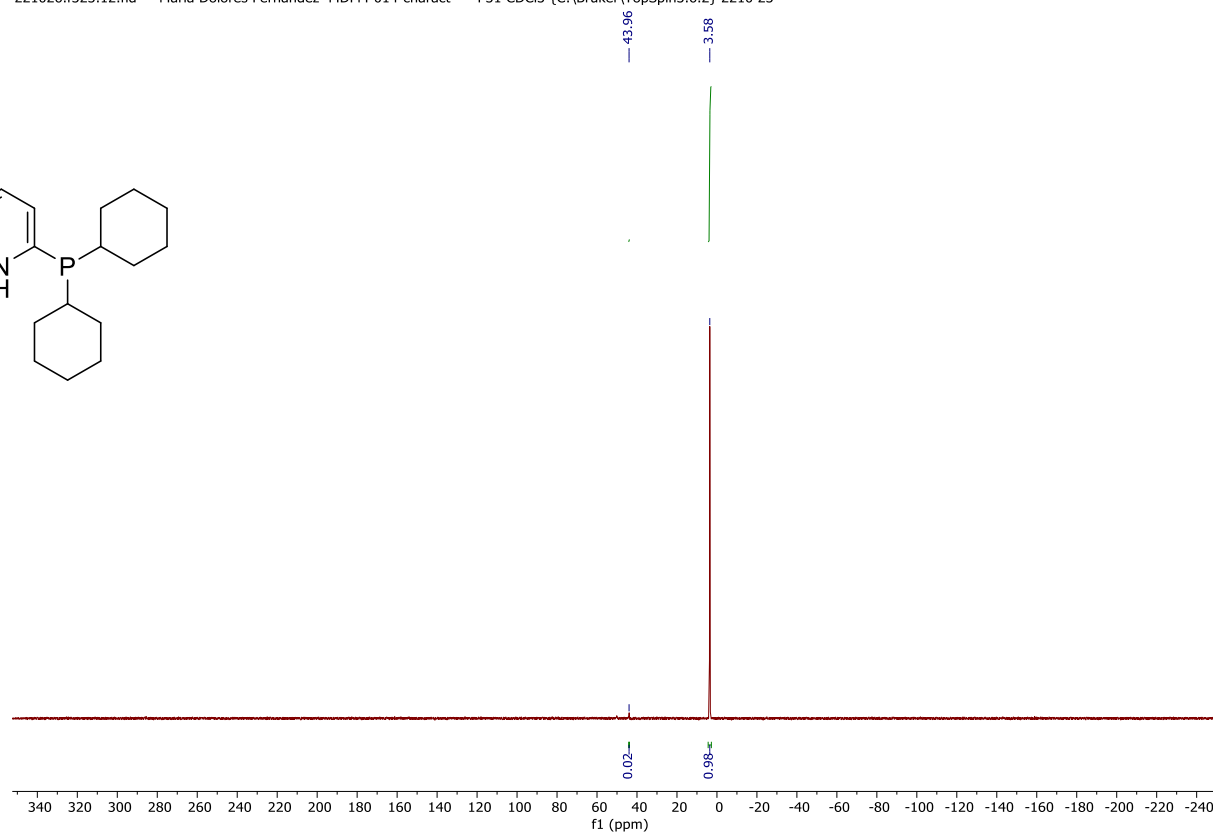

**Supplementary Figure 7.  $^{31}\text{P}$  NMR spectrum of L2 in  $\text{CDCl}_3$  at RT and AP.**

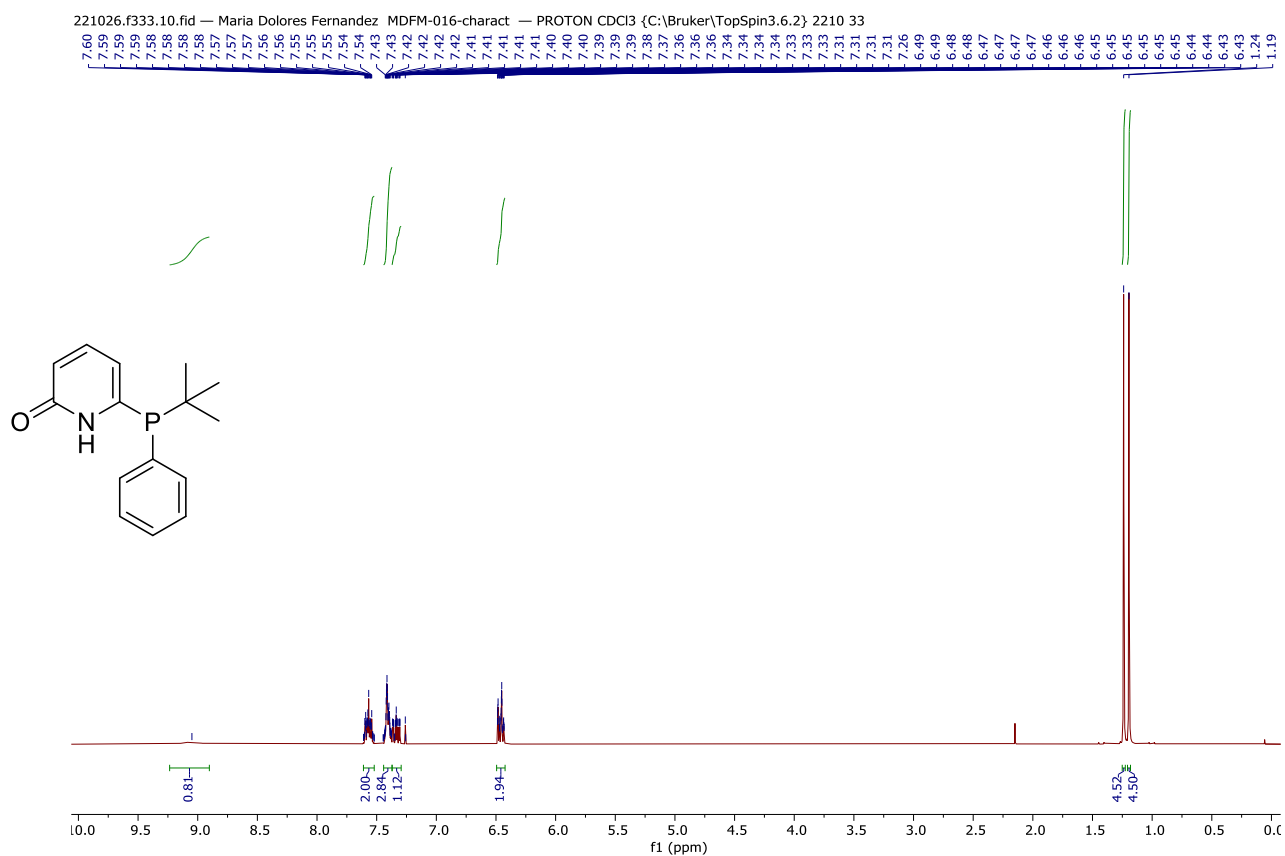

Supplementary Figure 8. <sup>1</sup>H NMR spectrum of L3 in CDCl<sub>3</sub> at RT and AP.

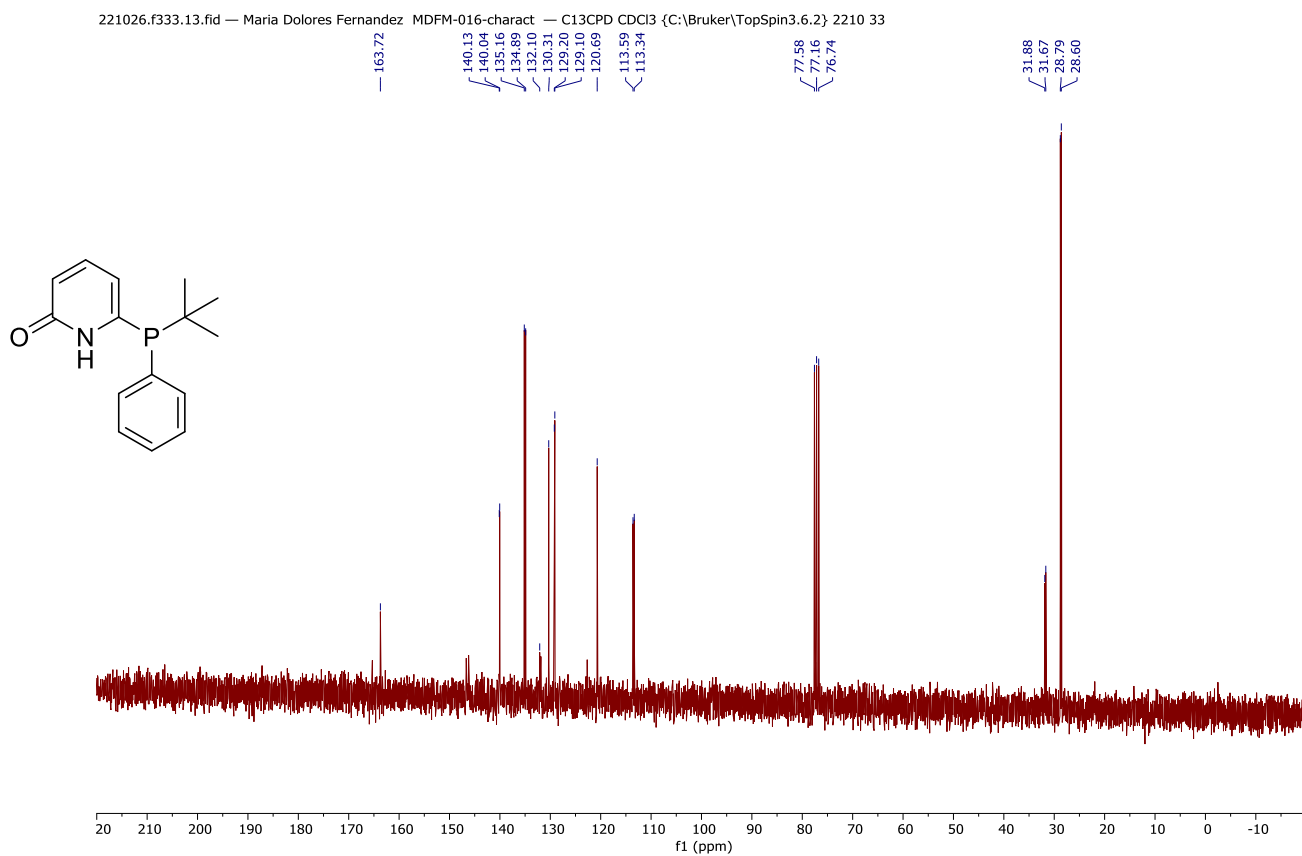

Supplementary Figure 9. <sup>13</sup>C NMR spectrum of L3 in CDCl<sub>3</sub> at RT and AP.

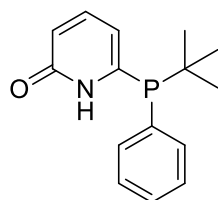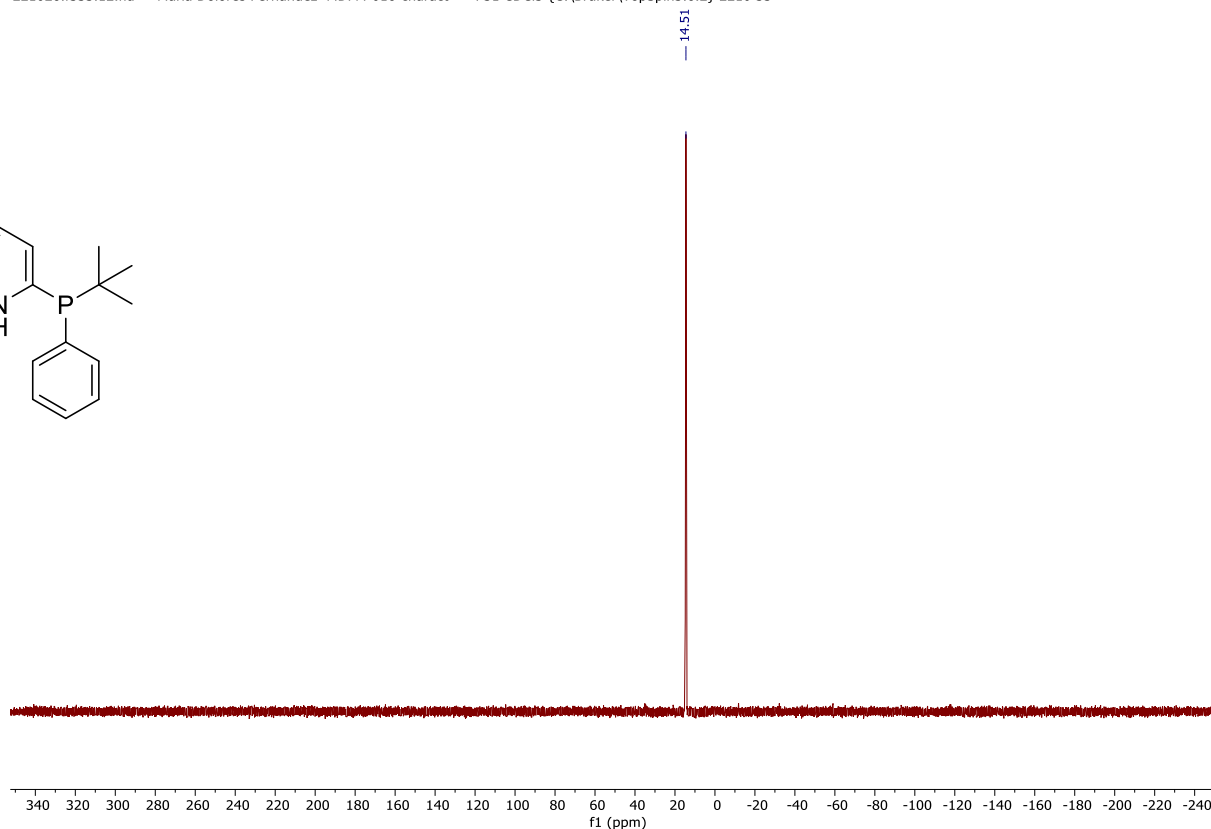

Supplementary Figure 10. <sup>31</sup>P NMR spectrum of L3 in CDCl<sub>3</sub> at RT and AP.

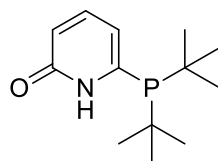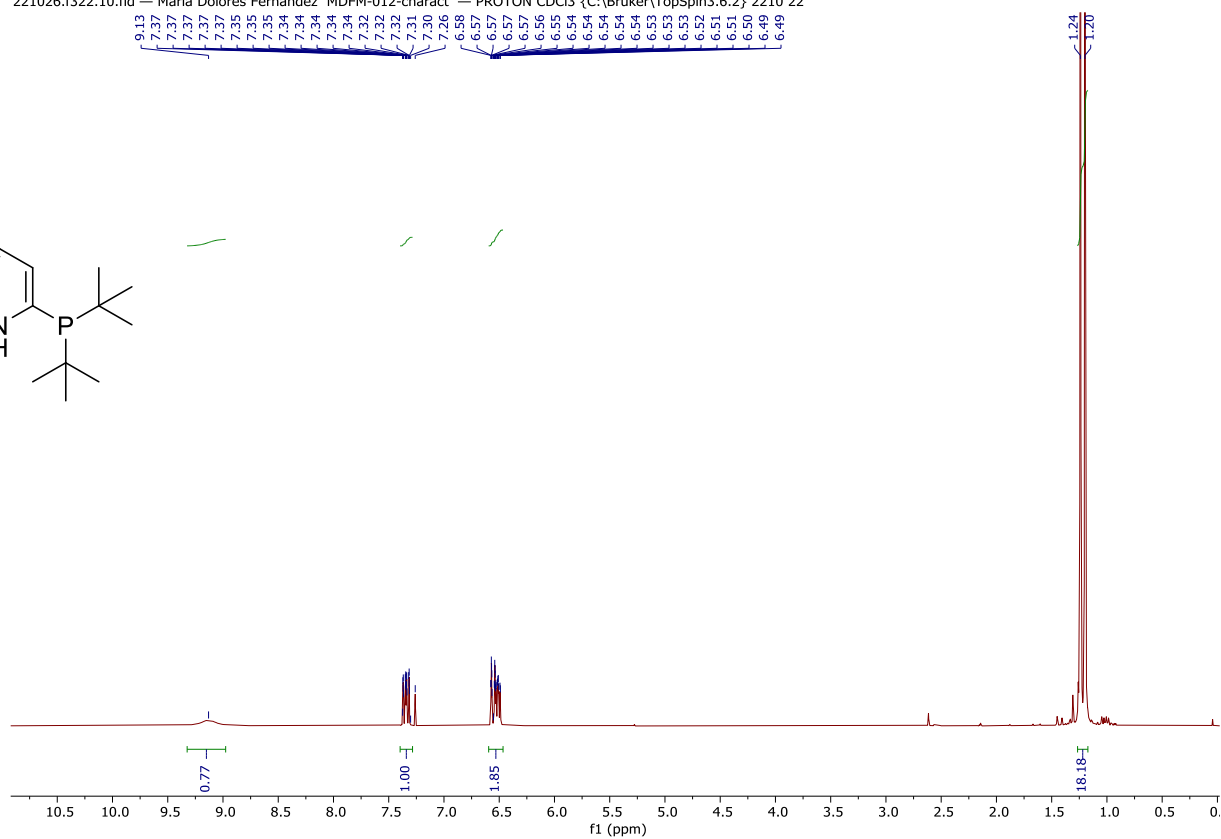

Supplementary Figure 11. <sup>1</sup>H NMR spectrum of L4 in CDCl<sub>3</sub> at RT and AP.

221026.f322.13.fid — Maria Dolores Fernandez MDFM-012-charact — C13CPD CDCl3 {C:\Bruker\TopSpin3.6.2} 2210 22

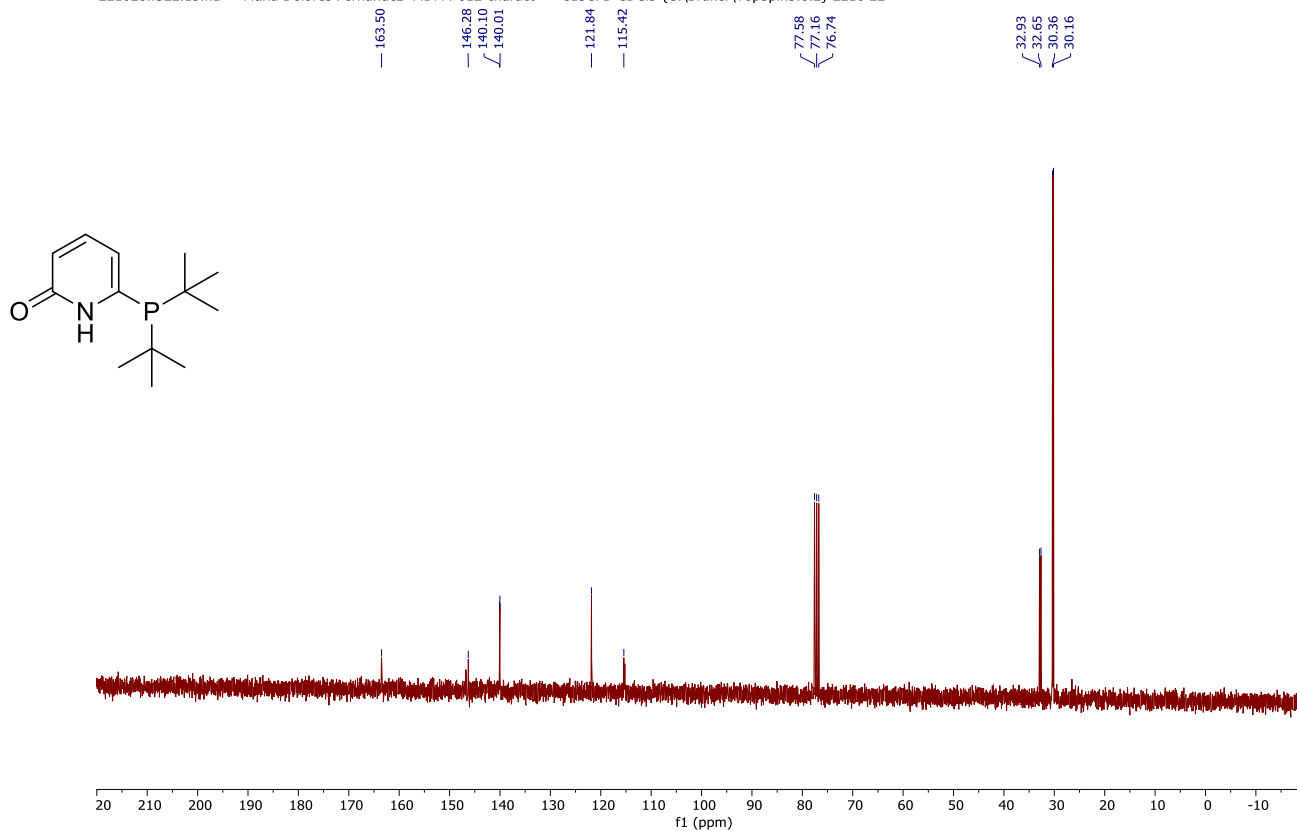

**Supplementary Figure 12.  $^{13}\text{C}$  NMR spectrum of L4 in  $\text{CDCl}_3$  at RT and AP.**

221026.f322.12.fid — Maria Dolores Fernandez MDFM-012-charact — P31 CDCl3 {C:\Bruker\TopSpin3.6.2} 2210 22

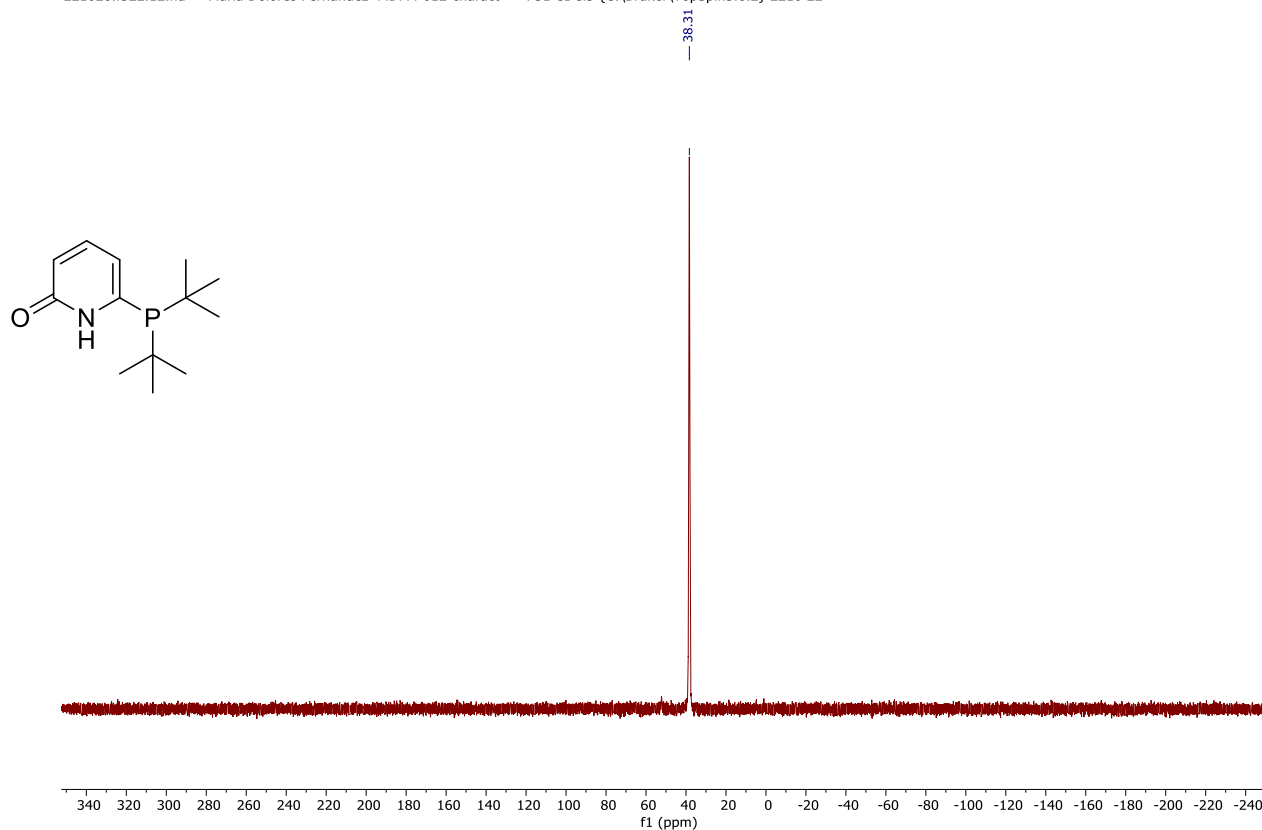

**Supplementary Figure 13.  $^{31}\text{P}$  NMR spectrum of L4 in  $\text{CDCl}_3$  at RT and AP.**

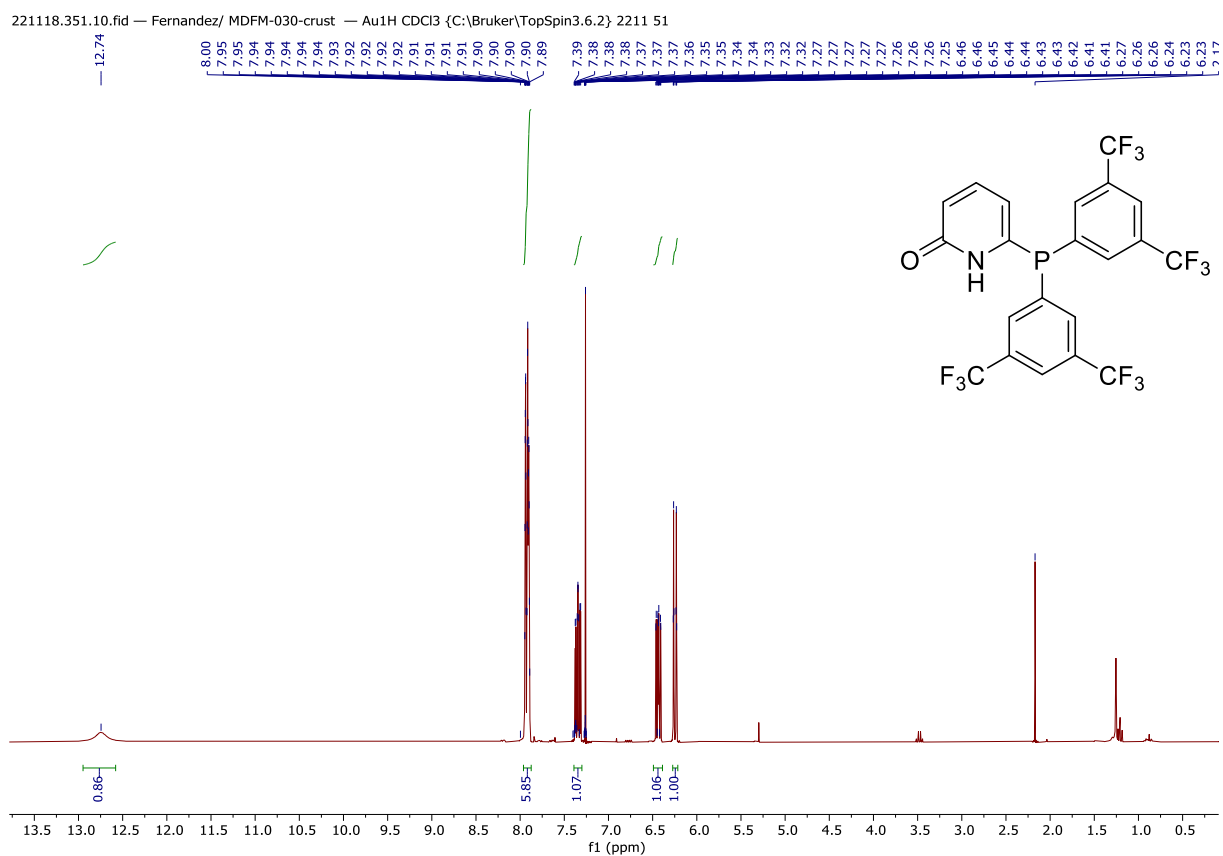

Supplementary Figure 14. <sup>1</sup>H NMR spectrum of L5 in CDCl<sub>3</sub> at RT and AP.

221118.351.13.fid  
Fernandez/ MDFM-030-crust  
Au13C CDCl3 {C:\Bruker\TopSpin3.6.2} 2211 51

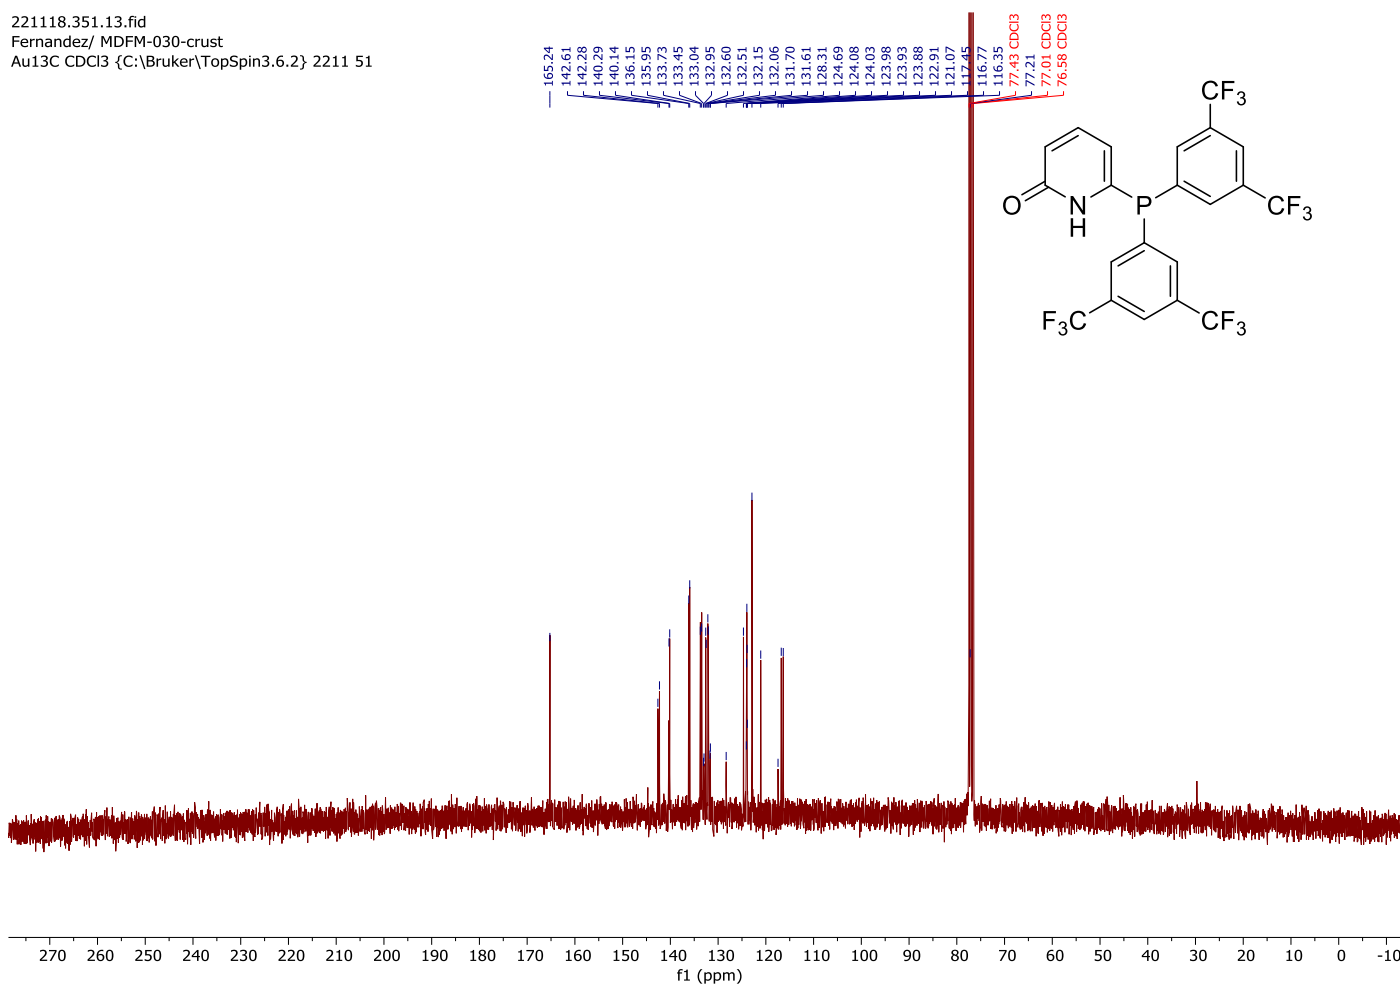

Supplementary Figure 15.  $^{13}\text{C}$  NMR spectrum of L5 in  $\text{CDCl}_3$  at RT and AP.

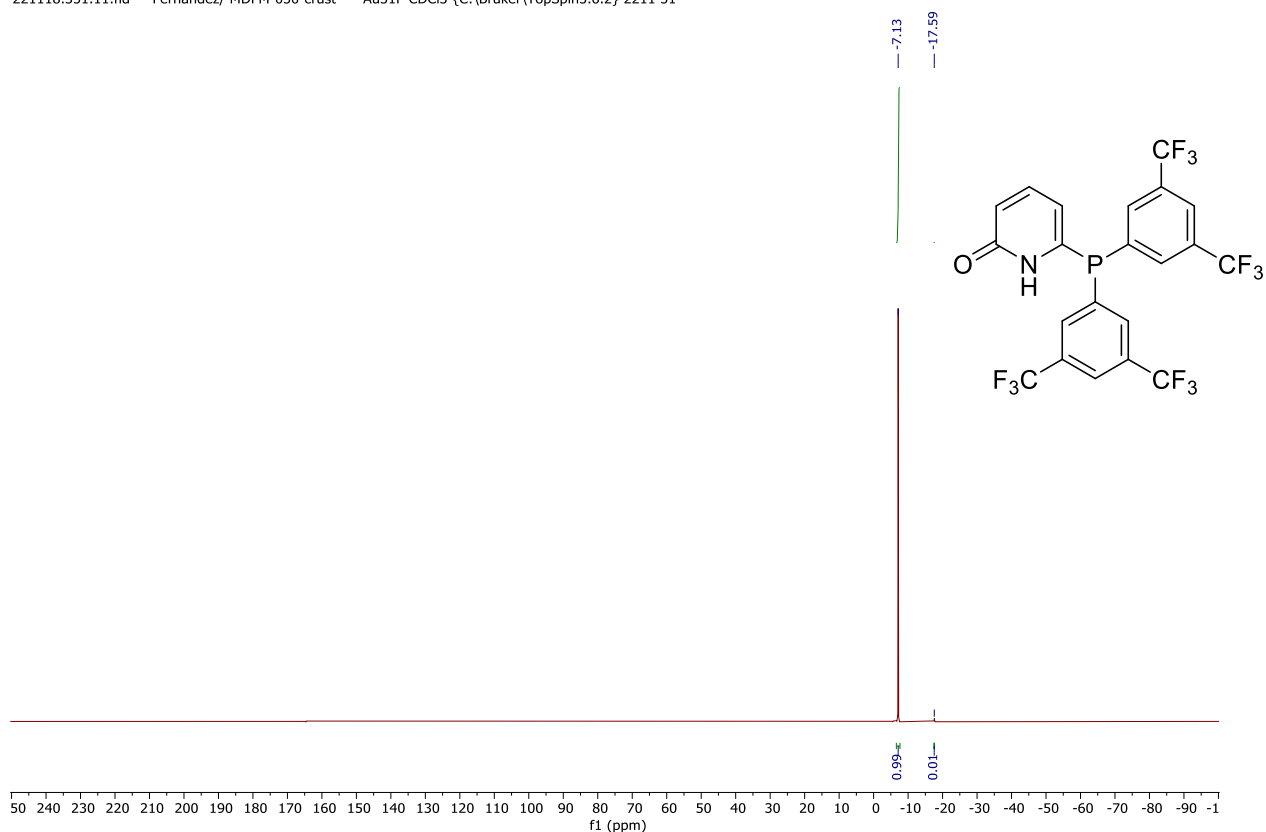

Supplementary Figure 16. <sup>31</sup>P NMR spectrum of L5 in CDCl<sub>3</sub> at RT and AP.

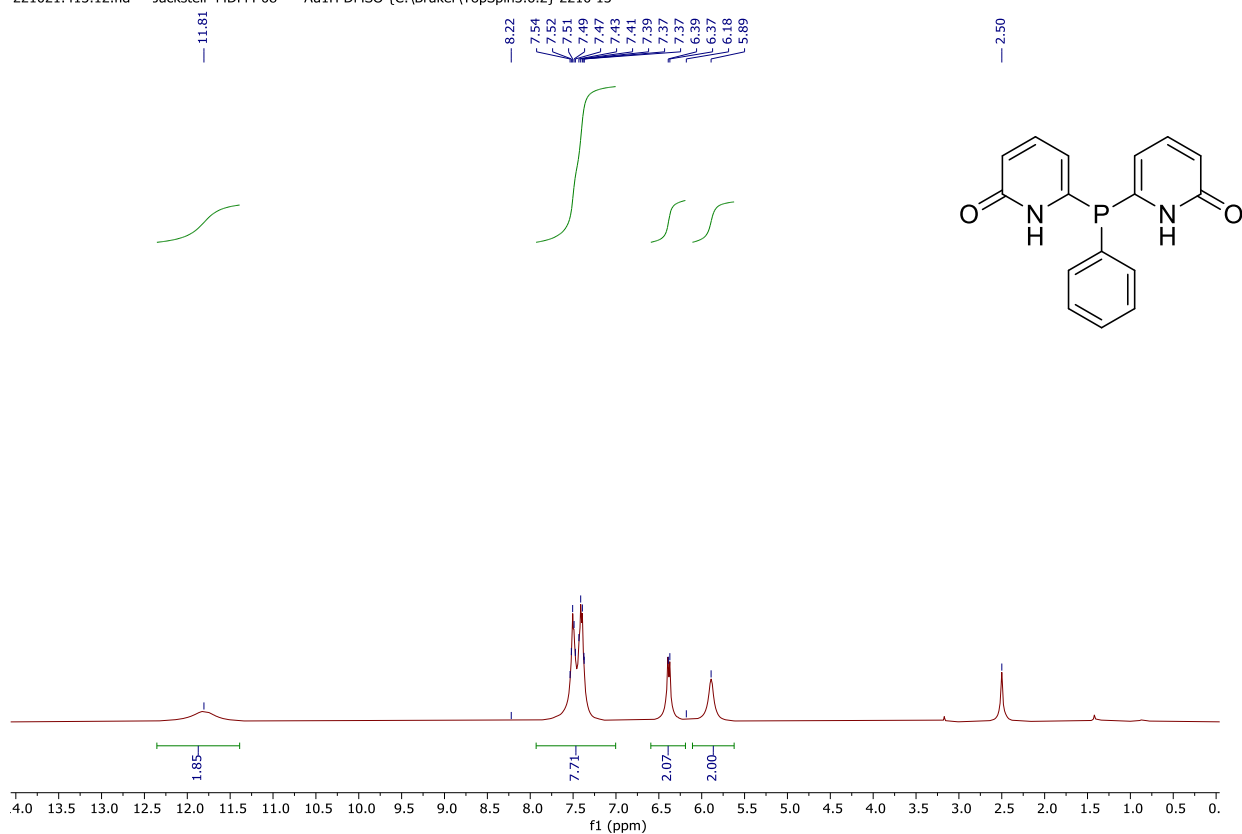

Supplementary Figure 17. <sup>1</sup>H NMR spectrum of L6 in DMSO-d<sub>6</sub> at RT and AP.

221021.413.13.fid — Jackstell MDFM-08 — Au13C DMSO {C:\Bruker\TopSpin3.6.2} 2210 13

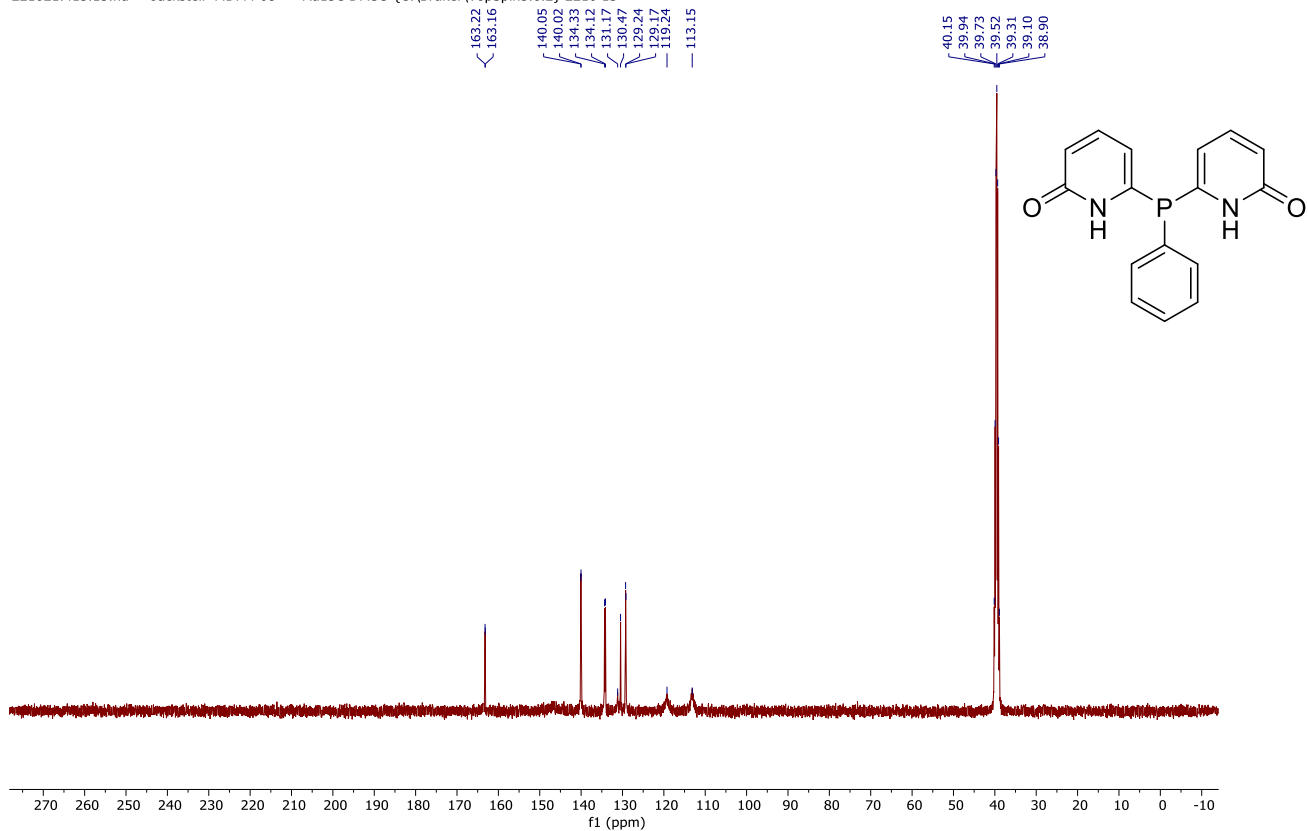

221021.413.10.fid — Jackstell MDFM-08 — Au31P DMSO {C:\Bruker\TopSpin3.6.2} 2210 13

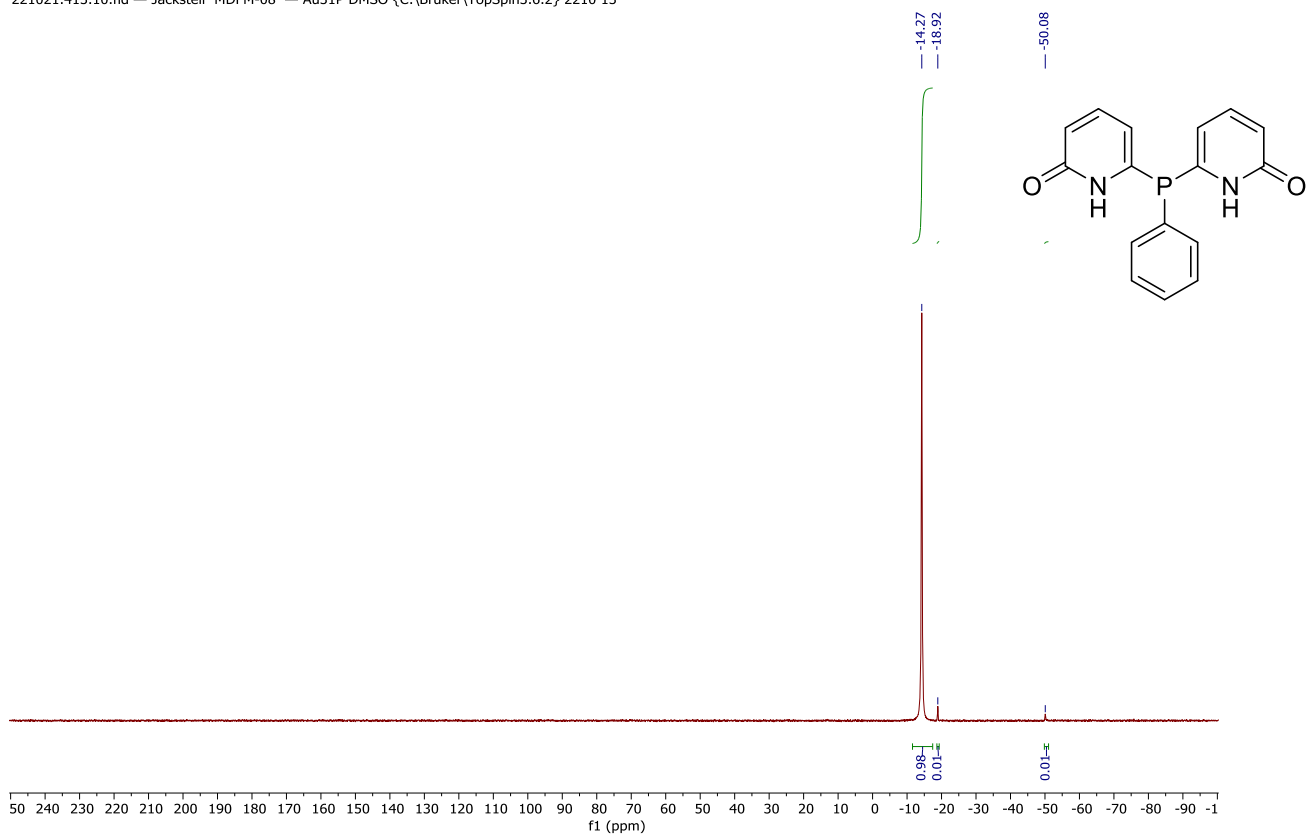

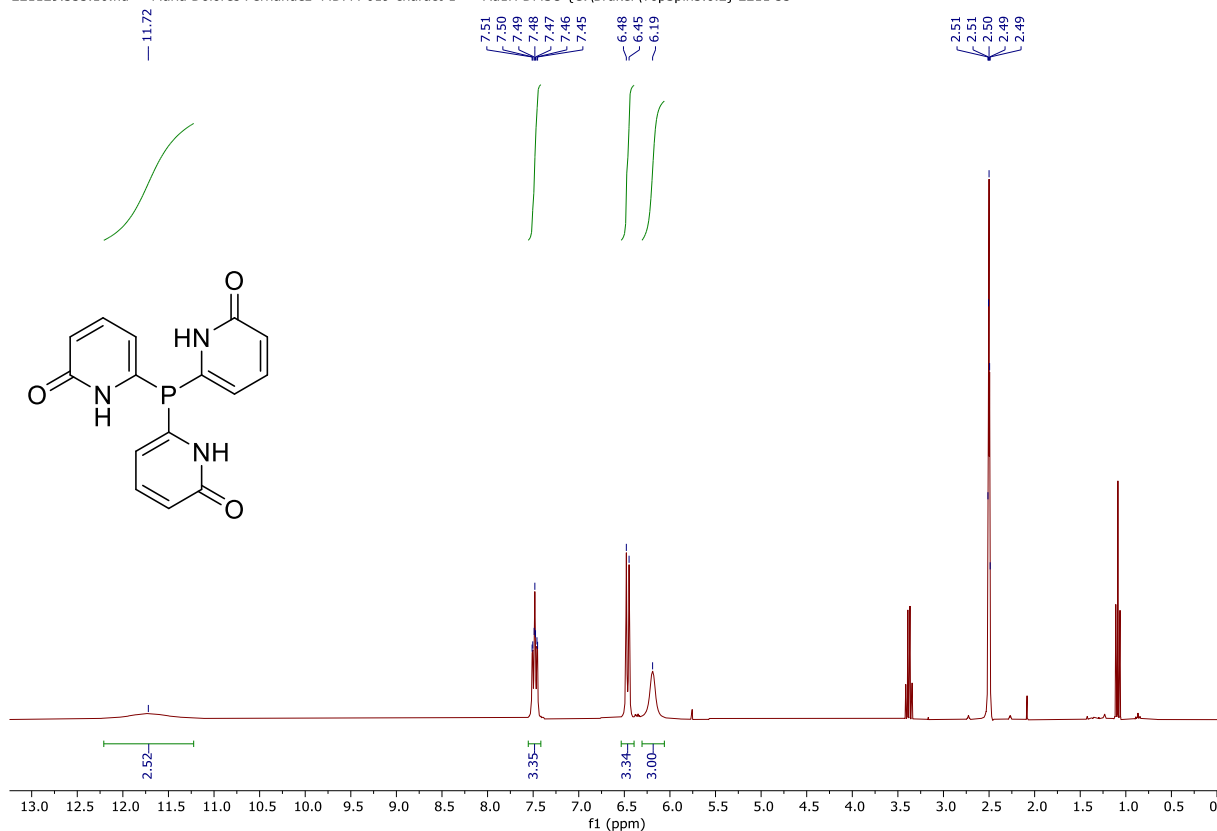

**Supplementary Figure 20. <sup>1</sup>H NMR spectrum of L7 in DMSO-d<sub>6</sub> at RT and AP.**

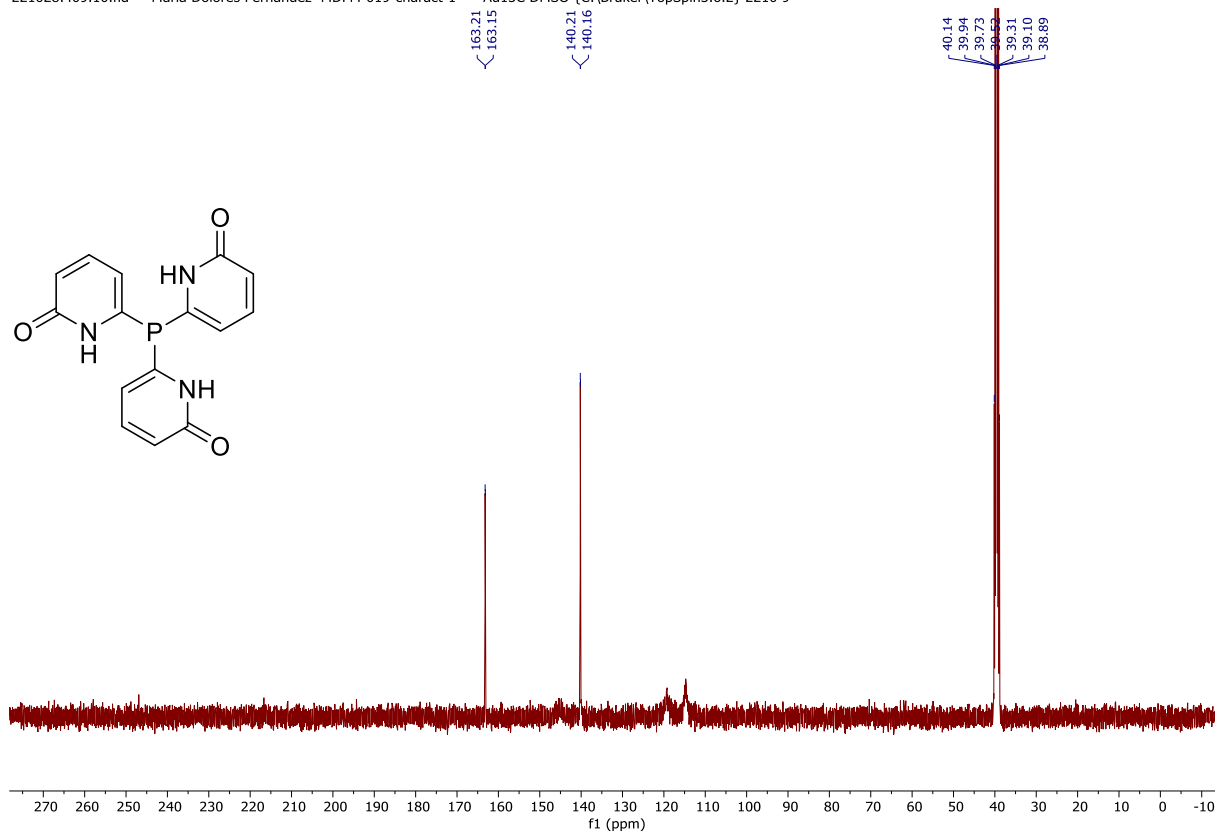

**Supplementary Figure 21. <sup>13</sup>C NMR spectrum of L7 in DMSO-d<sub>6</sub> at RT and AP.**

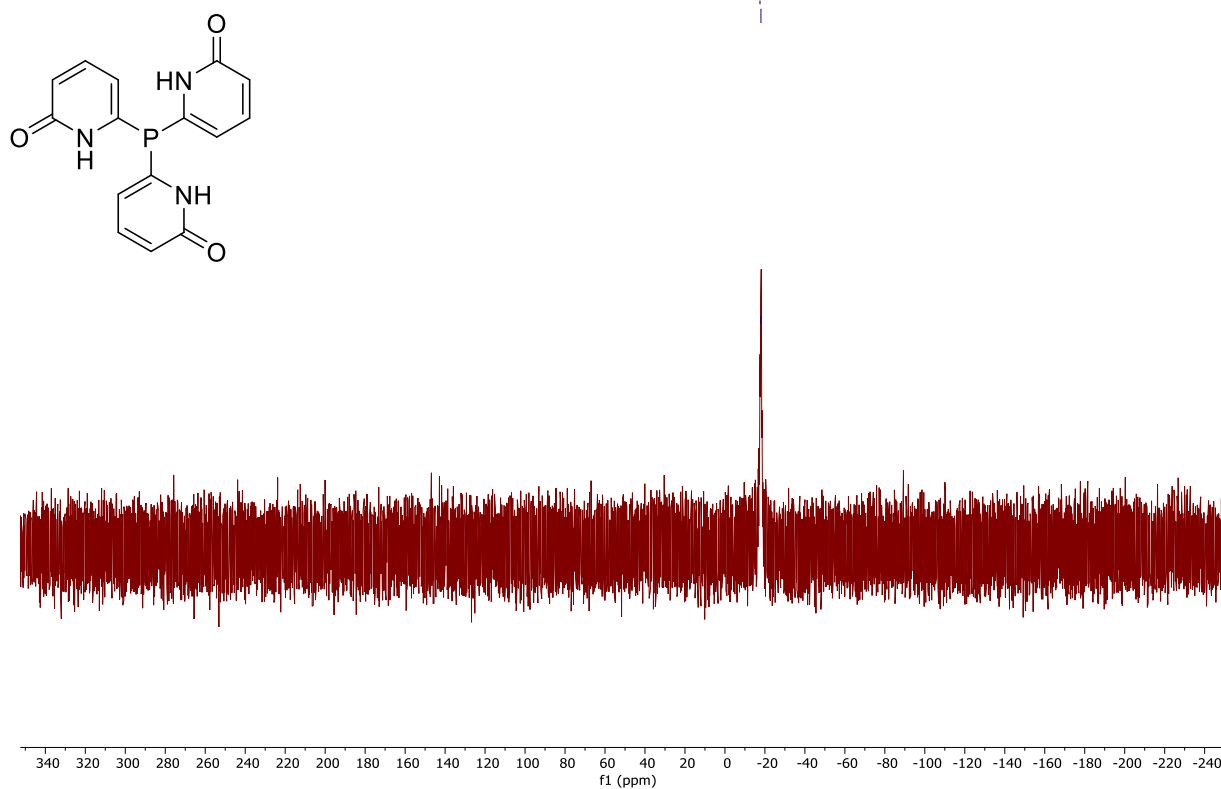

**Supplementary Figure 22.  $^{31}\text{P}$ -NMR spectrum of L7 in DMSO- $\text{d}_6$  at RT and AP.**

# SI-D: HR-MS (ESI) of the phosphine ligands (L1-L7)

## ESI-TOF Accurate Mass Report

File: 22101803

Vial: 1.F.1

Description: MeOH/0.1% HCOOH in H<sub>2</sub>O 90:10

Sample Name: MDFM-015

Date: 18-Oct-2022

UserName: Fernandez

Time: 12:42:26

Page 2

## Sample Report:

(Time: 0.34) Combine (31-79:83) - Dead time test passed

1: TOF MS ES+  
1.5e+008

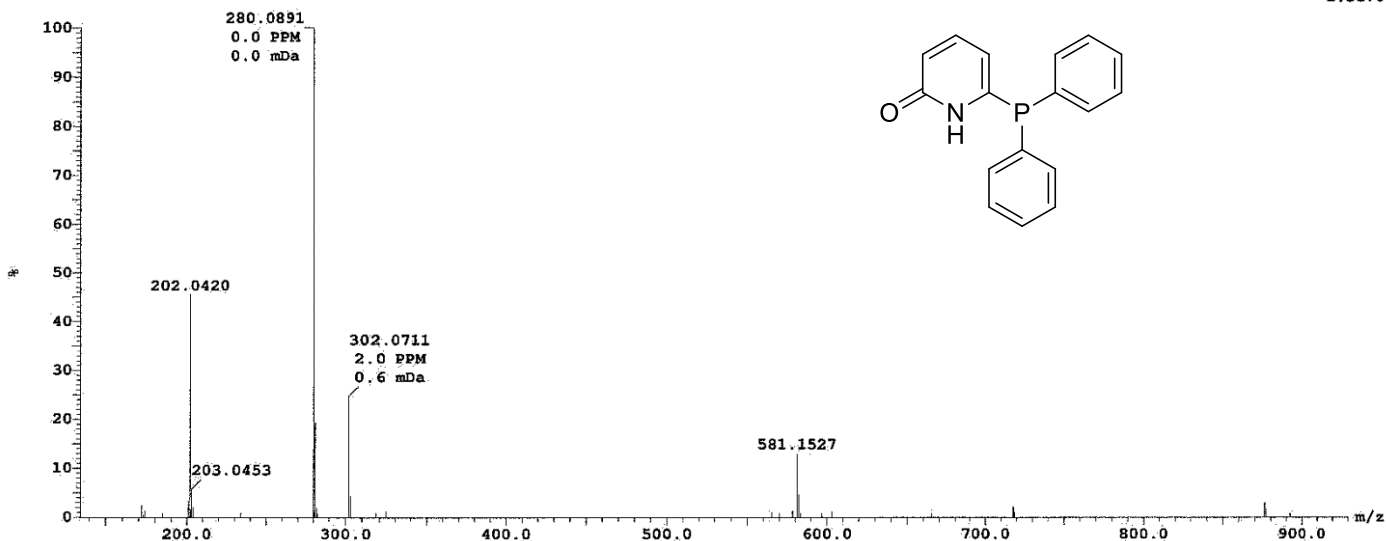

## ESI-TOF Accurate Mass Report

Page 1

Results file: E:\Projects\2210.PRO\SampleDB\2210.rpt  
Last modified: Tuesday, October 18, 2022 12:45:14

## Sample Summary:

| Sample | File     | Sample Name | User      | Target   | Formula                             | Expected Mass        | Observed Mass        | Error PPM  | Error mDa  |
|--------|----------|-------------|-----------|----------|-------------------------------------|----------------------|----------------------|------------|------------|
| 33     | 22101803 | MDFM-015    | Fernandez | 279.0813 | C <sub>17</sub> H <sub>14</sub> PON | 280.0891<br>302.0705 | 280.0891<br>302.0711 | 0.0<br>2.0 | 0.0<br>0.6 |

## Supplementary Figure 23.a Accurate Mass Report of L1

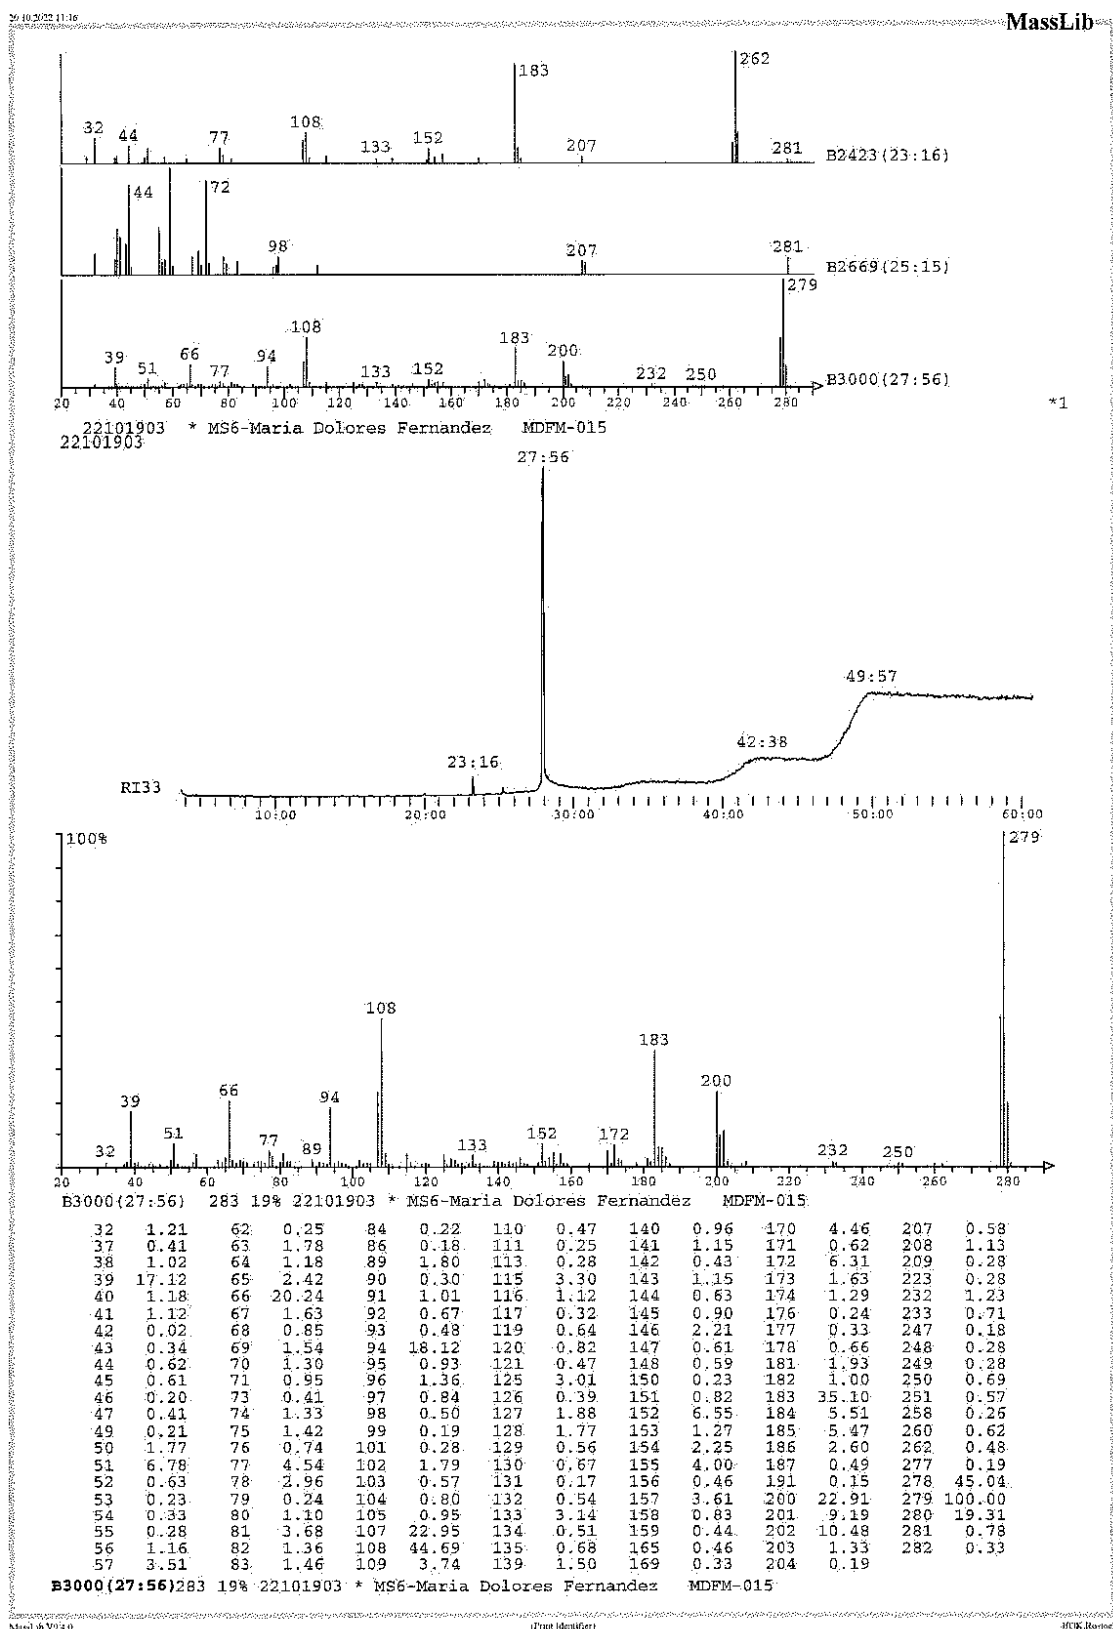

Supplementary Figure 23.b HR-MS spectrum of L1

## ESI-TOF Accurate Mass Report

File:22101802

Vial:1:F,1

Description:MeOH/0.1%HCOOH in H2O 90:10

Sample Name:MDFM-014

Date:18-Oct-2022

UserName:Fernandez

Time:11:57:26

Page 2

## Sample Report:

(Time: 0.50) Combine (45-94:97) - Dead time test passed

1:TOF MS ES+  
2.6e+008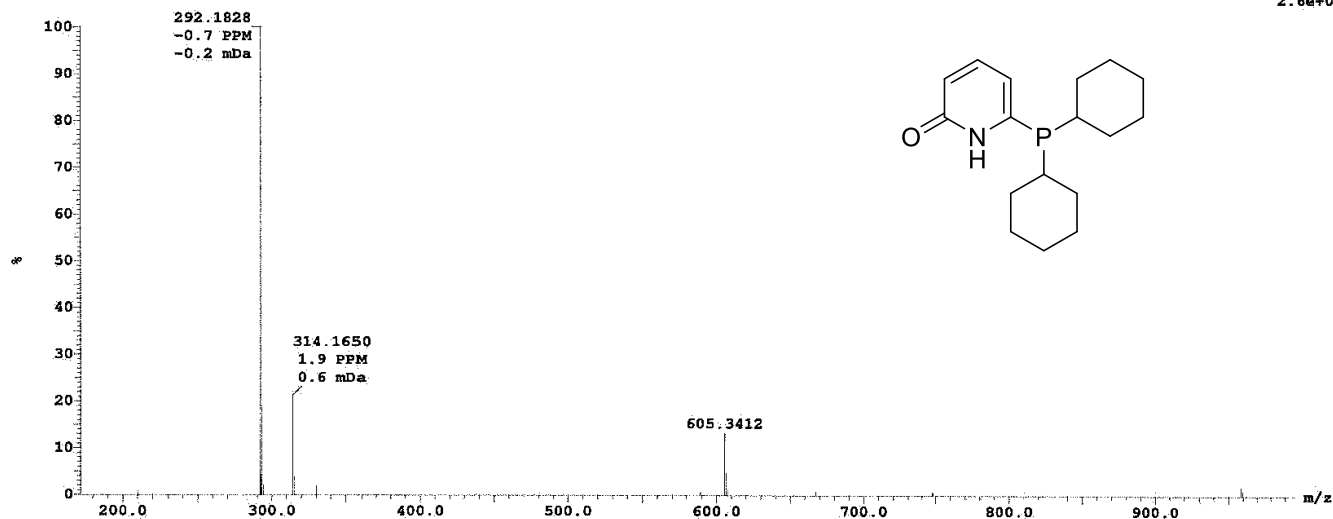

## ESI-TOF Accurate Mass Report

Page 1

Results file: E:\Projects\2210.PRO\SampleDB\2210.rpt  
Last modified: Tuesday, October 18, 2022 12:01:04

## Sample Summary:

| Sample | File     | Sample Name | User      | Target   | Formula   | Expected Mass        | Observed Mass        | Error PPM   | Error mDa   |
|--------|----------|-------------|-----------|----------|-----------|----------------------|----------------------|-------------|-------------|
| 32     | 22101802 | MDFM-014    | Fernandez | 291.1752 | C17H26PON | 292.1830<br>314.1644 | 292.1828<br>314.1650 | -0.7<br>1.9 | -0.2<br>0.6 |

## Supplementary Figure 24.a Accurate Mass Report of L2

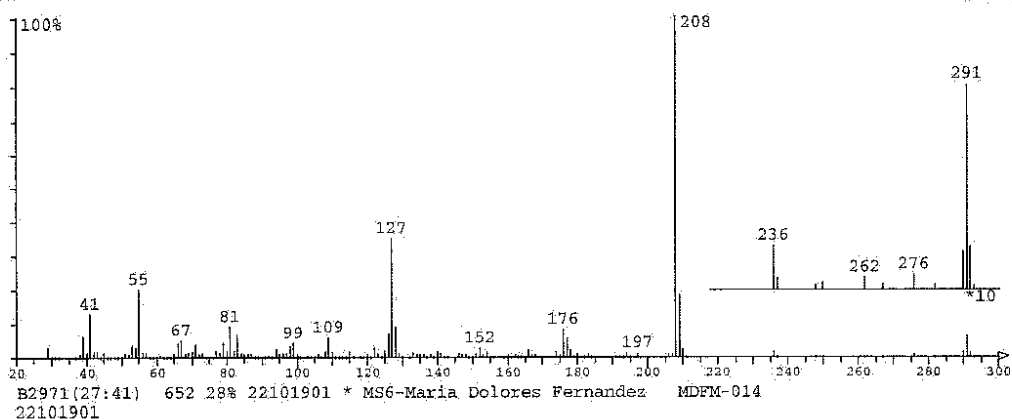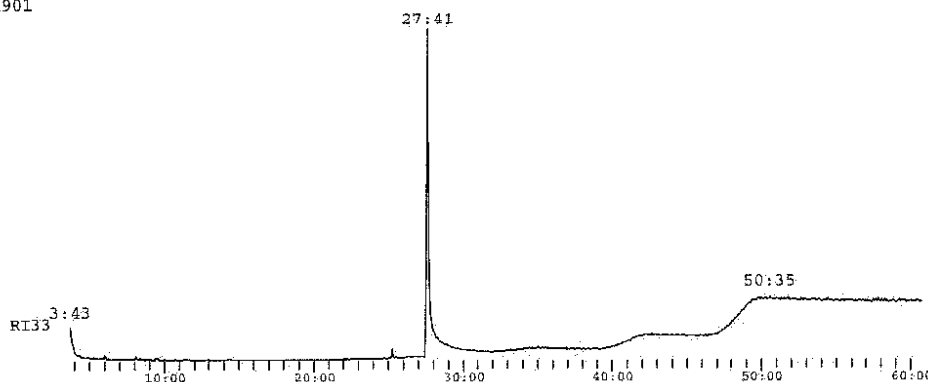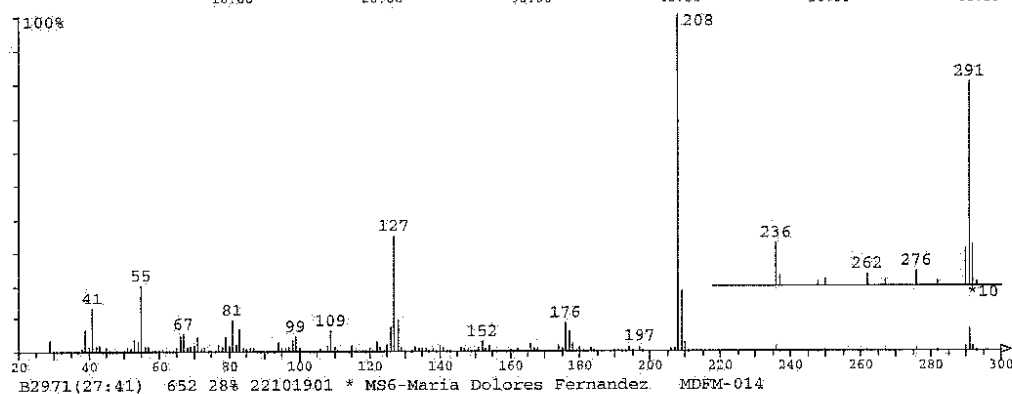

|    |       |    |      |     |      |     |       |     |      |     |      |     |        |
|----|-------|----|------|-----|------|-----|-------|-----|------|-----|------|-----|--------|
| 29 | 2.91  | 56 | 1.23 | 81  | 8.88 | 106 | 0.37  | 128 | 8.87 | 153 | 0.56 | 183 | 0.39   |
| 30 | 0.22  | 57 | 1.22 | 82  | 1.66 | 107 | 0.26  | 129 | 0.91 | 154 | 1.45 | 192 | 0.26   |
| 32 | 0.27  | 58 | 0.21 | 83  | 6.26 | 108 | 1.52  | 132 | 0.28 | 155 | 0.16 | 193 | 0.15   |
| 37 | 0.17  | 59 | 0.28 | 84  | 0.70 | 109 | 5.65  | 133 | 1.11 | 156 | 0.17 | 194 | 0.67   |
| 38 | 0.50  | 61 | 0.36 | 85  | 0.64 | 110 | 1.16  | 134 | 0.64 | 160 | 0.36 | 197 | 0.94   |
| 39 | 6.05  | 64 | 0.33 | 86  | 0.38 | 111 | 0.16  | 135 | 0.39 | 161 | 0.15 | 198 | 0.15   |
| 40 | 0.98  | 65 | 0.88 | 87  | 0.67 | 112 | 0.16  | 136 | 0.49 | 162 | 0.57 | 206 | 0.37   |
| 41 | 12.70 | 66 | 4.10 | 88  | 0.13 | 113 | 0.31  | 137 | 0.17 | 163 | 0.20 | 207 | 0.49   |
| 42 | 1.06  | 67 | 4.79 | 91  | 0.22 | 114 | 0.21  | 138 | 0.49 | 164 | 0.22 | 208 | 100.00 |
| 43 | 1.26  | 68 | 0.75 | 93  | 0.28 | 115 | 1.46  | 139 | 0.18 | 165 | 0.26 | 209 | 18.32  |
| 44 | 0.22  | 69 | 1.01 | 94  | 2.27 | 116 | 0.30  | 140 | 1.41 | 166 | 1.89 | 210 | 2.20   |
| 45 | 0.70  | 70 | 1.30 | 95  | 0.94 | 117 | 0.45  | 141 | 0.82 | 167 | 0.49 | 211 | 0.30   |
| 46 | 0.34  | 71 | 3.63 | 96  | 0.78 | 119 | 0.18  | 142 | 0.17 | 168 | 0.38 | 236 | 1.24   |
| 47 | 0.35  | 72 | 0.61 | 97  | 0.93 | 120 | 0.39  | 143 | 0.17 | 174 | 1.37 | 237 | 0.27   |
| 49 | 0.15  | 73 | 0.83 | 98  | 3.27 | 121 | 0.33  | 146 | 0.73 | 175 | 0.40 | 250 | 0.17   |
| 50 | 0.18  | 74 | 0.20 | 99  | 3.93 | 122 | 2.40  | 147 | 0.42 | 176 | 7.96 | 262 | 0.33   |
| 51 | 0.86  | 75 | 0.16 | 100 | 0.51 | 123 | 0.93  | 148 | 0.64 | 177 | 5.54 | 276 | 0.39   |
| 52 | 0.49  | 77 | 1.58 | 101 | 0.23 | 124 | 0.34  | 149 | 0.30 | 178 | 1.94 | 290 | 1.07   |
| 53 | 3.21  | 78 | 1.09 | 103 | 0.24 | 125 | 1.69  | 150 | 0.33 | 179 | 0.16 | 291 | 6.01   |
| 54 | 2.60  | 79 | 4.11 | 104 | 0.31 | 126 | 6.87  | 151 | 0.82 | 180 | 0.76 | 292 | 1.21   |
| 55 | 19.98 | 80 | 1.46 | 105 | 0.23 | 127 | 34.86 | 152 | 2.46 | 181 | 0.33 |     |        |

B2971(27:41)652 28% 22101901 \* MS6-Maria Dolores Fernandez MDFM-014

lim: 0.13%

Supplementary Figure 24.b HR-MS spectrum of L2

## ESI-TOF Accurate Mass Report

File: 22101804

Vial: 1.F, 1

Description: MeOH/0.1% HCOOH in H<sub>2</sub>O 90:10Sample Name: MDFM-016  
Date: 18-Oct-2022User Name: Fernandez  
Time: 12:50:19

Page 2

## Sample Report:

(Time: 0.35) Combine (31:33-80:84) - Dead time test passed

1: TOF MS ES+  
2.2e+08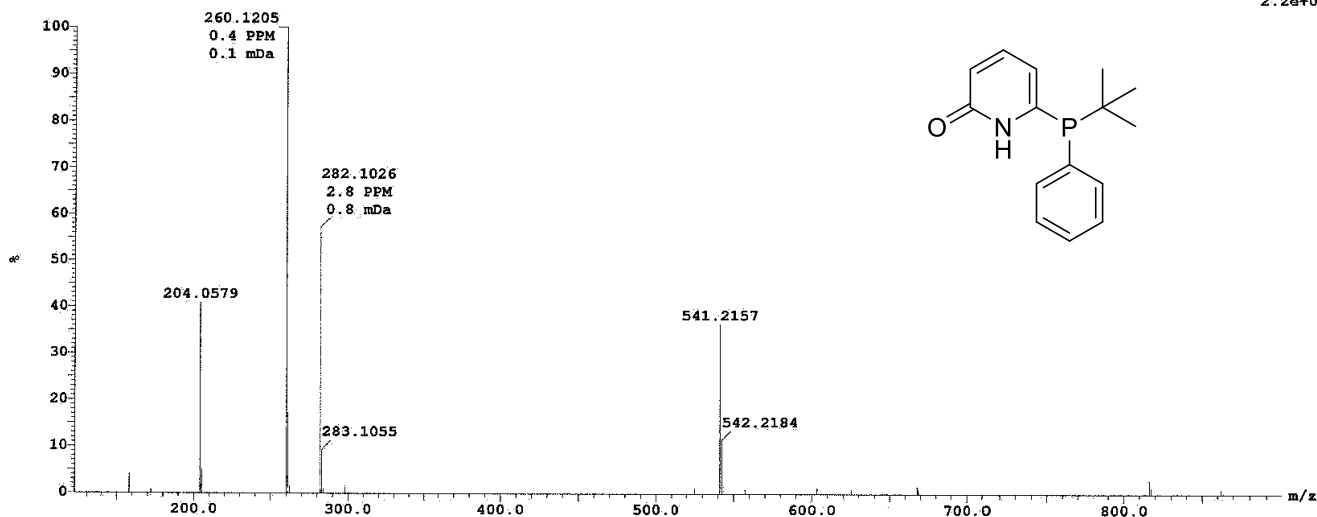

## ESI-TOF Accurate Mass Report

Page 1

Results file: E:\Projects\2210.PRO\SampleDB\2210.rpt  
Last modified: Tuesday, October 18, 2022 12:53:13

## Sample Summary:

| Sample | File     | Sample Name | User      | Target   | Formula   | Expected Mass        | Observed Mass        | Error PPM  | Error mDa  |
|--------|----------|-------------|-----------|----------|-----------|----------------------|----------------------|------------|------------|
| 34     | 22101804 | MDFM-016    | Fernandez | 259.1126 | C15H18PON | 260.1204<br>282.1018 | 260.1205<br>282.1026 | 0.4<br>2.8 | 0.1<br>0.8 |

## Supplementary Figure 25.a Accurate Mass Report of L3

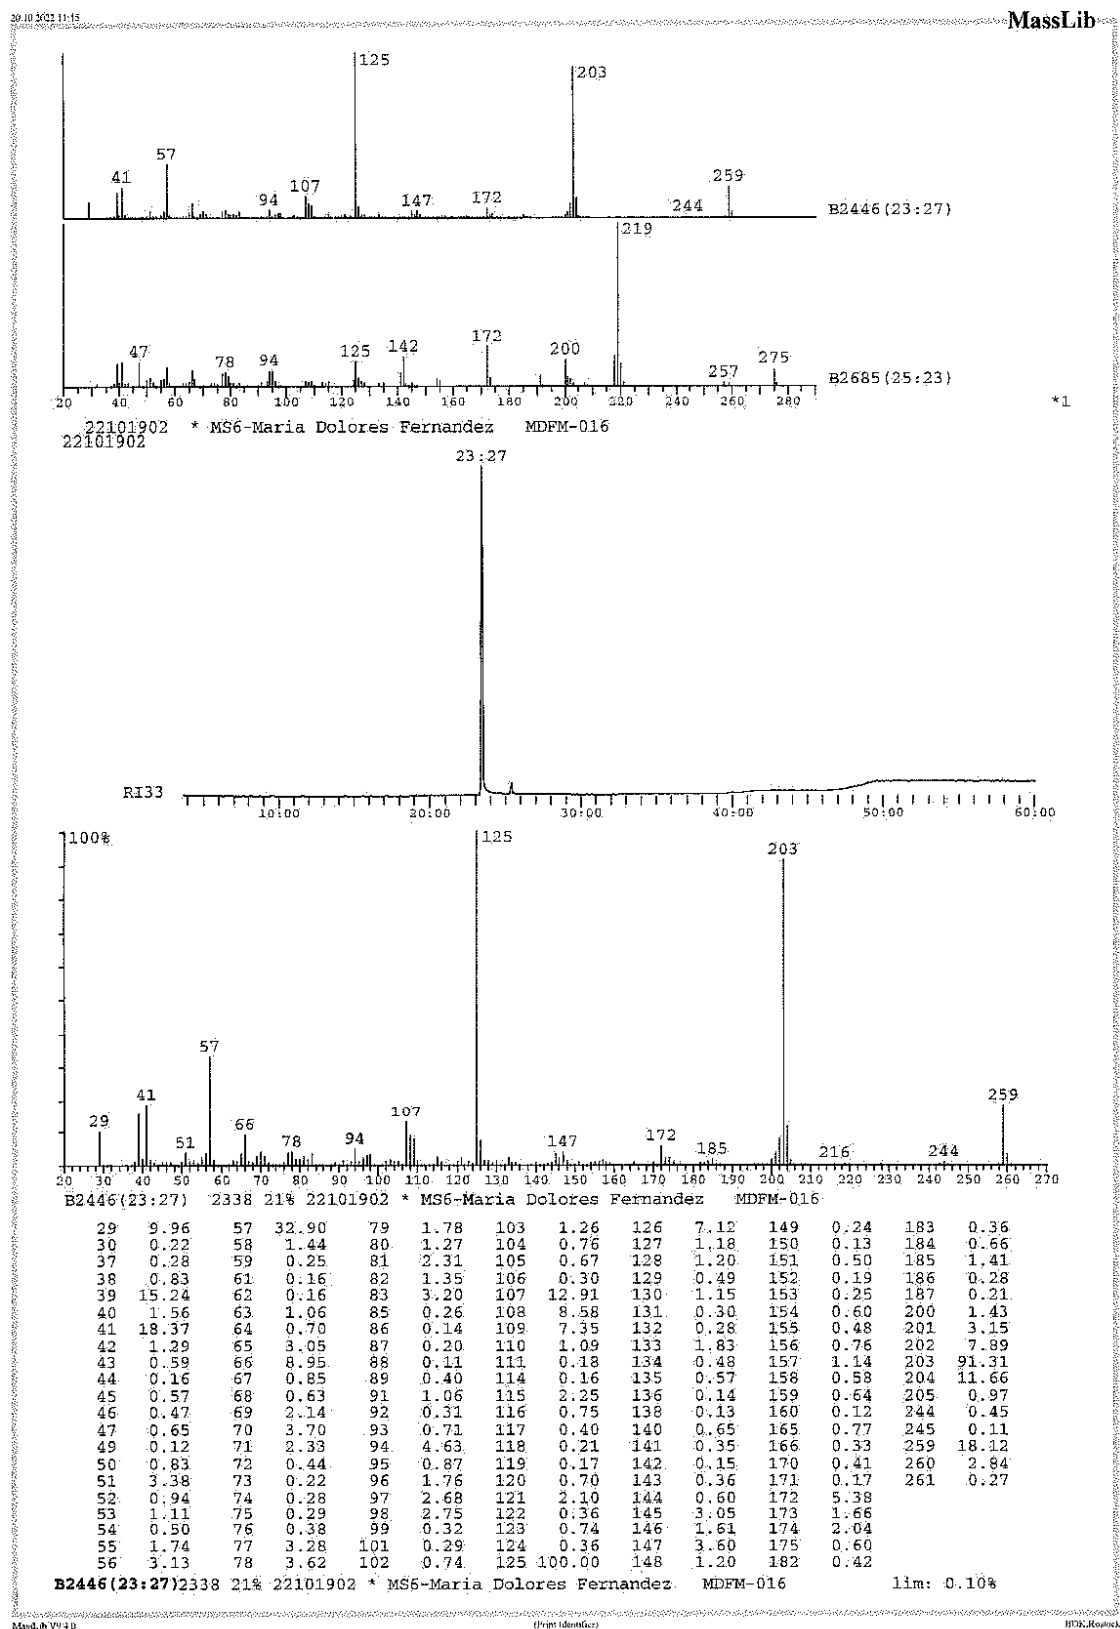

Supplementary Figure 25.b HR-MS spectrum of L3

## ESI-TOF Accurate Mass Report

File:22101801

Vial:1:F,1

Description:MeOH/0.1%HCOOH in H2O 90:10

Sample Name:MDFM-012

Date:18-Oct-2022

UserName:Fernandez

Time:11:49:55

Page 2

## Sample Report:

(Time: 0.35) Combine (31:32-80:84) 240.1521  
1.7 PPM  
0.4 mDa

1:TOF MS ES+  
1.4e+008

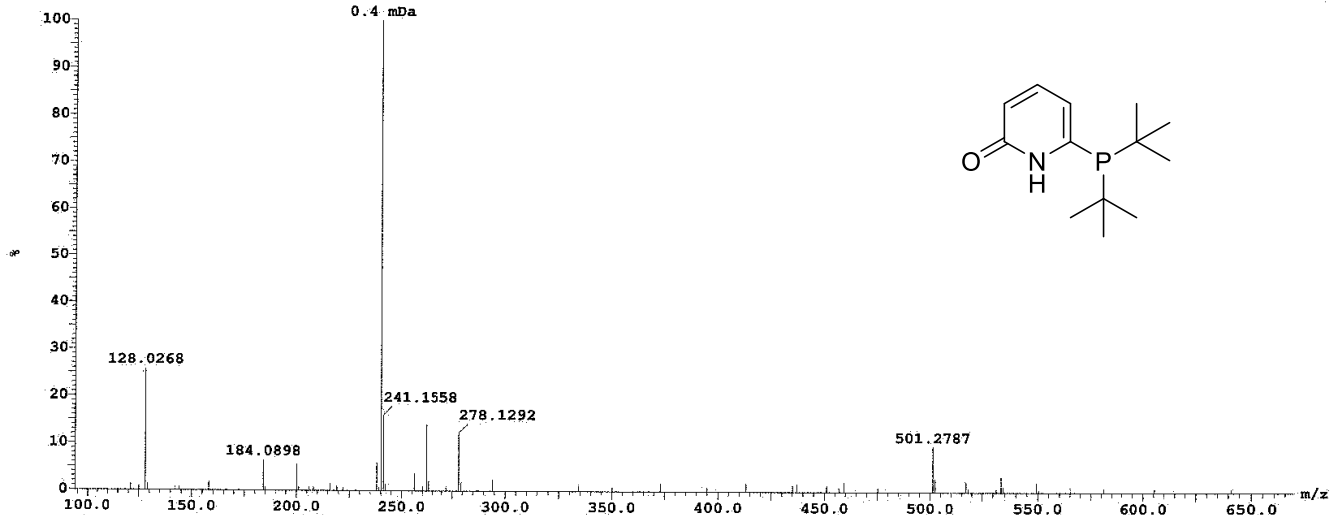

## ESI-TOF Accurate Mass Report

Page 1

Results file: E:\Projects\2210.PRO\SampleDB\2210.rpt

Last modified: Tuesday, October 18, 2022 11:54:50

## Sample Summary:

| Sample | File     | Sample Name | User      | Target   | Formula   | Expected Mass | Observed Mass | Error PPM | Error mDa |
|--------|----------|-------------|-----------|----------|-----------|---------------|---------------|-----------|-----------|
| 31     | 22101801 | MDFM-012    | Fernandez | 239.1439 | C13H22ONP | 240.1517      | 240.1521      | 1.7       | 0.4       |

## Supplementary Figure 26.a Accurate Mass Report of L4

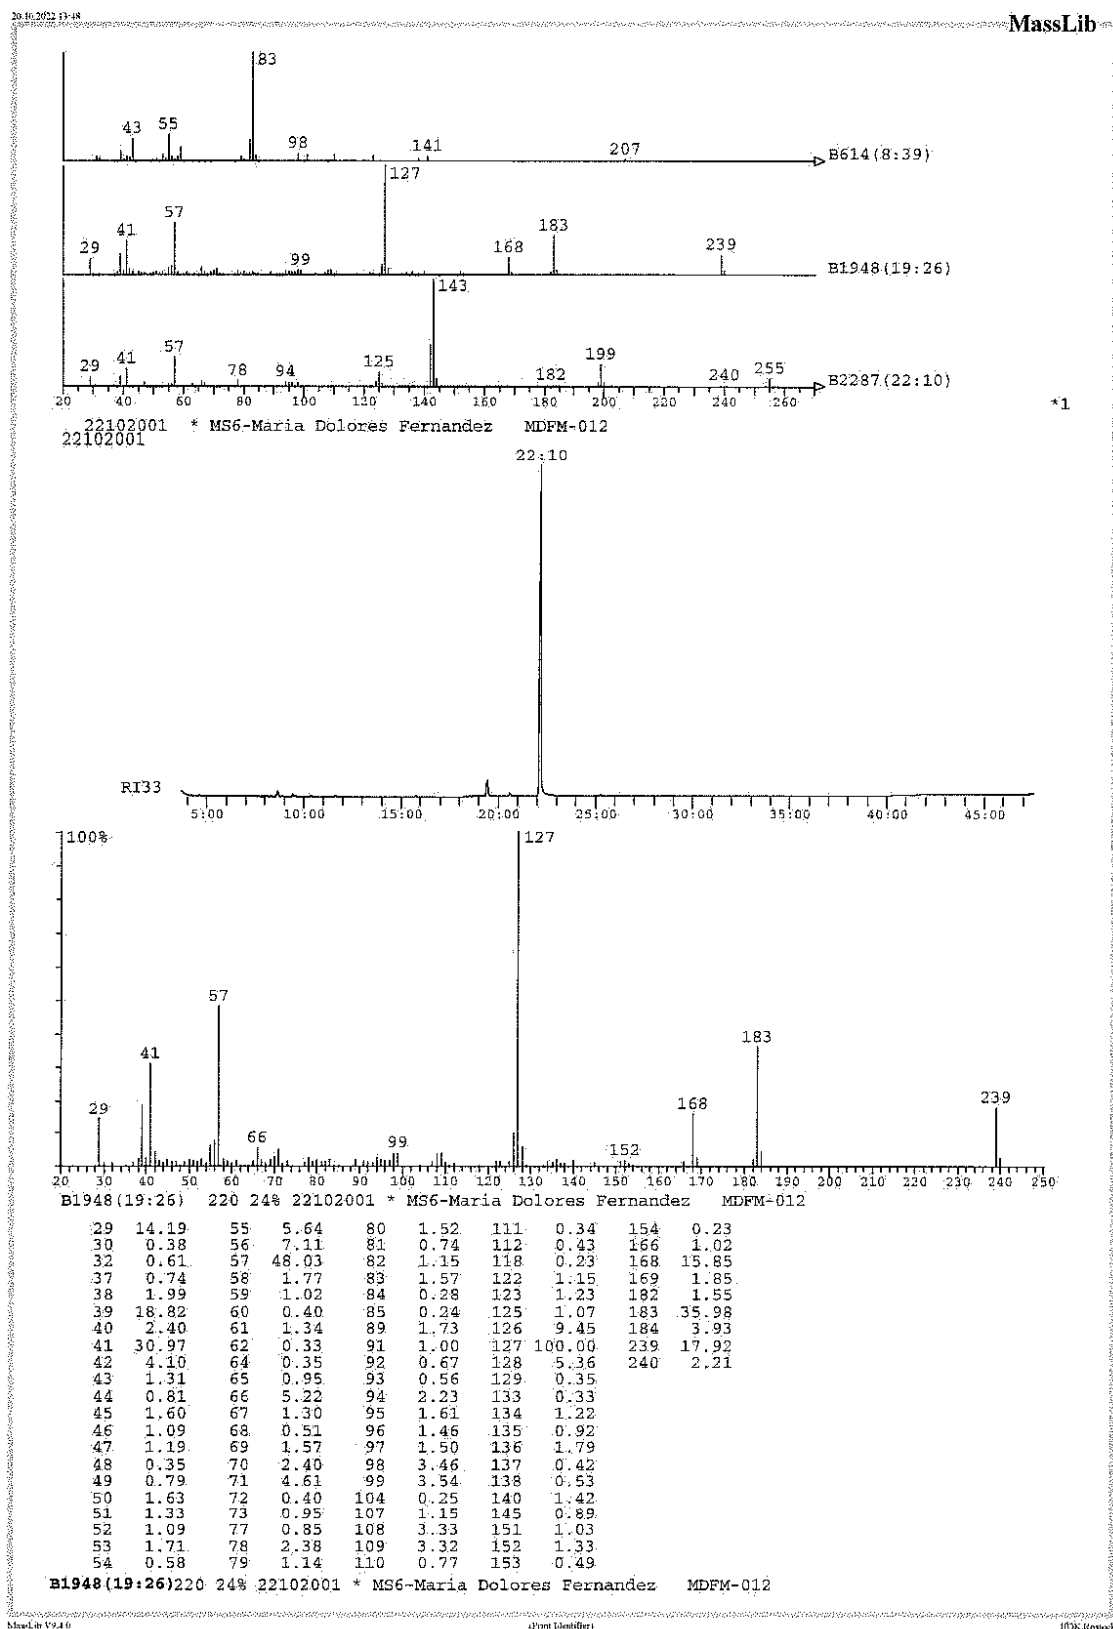

Fernandez

HDFTI-028

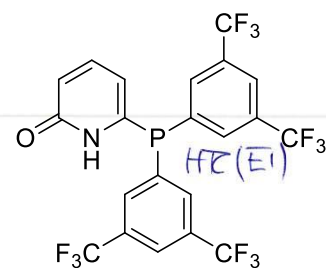

File : D:\Xcalibur\data\2211\22112206eihr-av2.RAW  
Full ms [539.500 - 571.500 ] - Range: 539.500 - 571.500  
Scan No. 1 of 1

| Mass      | Absolute<br>Intensity | Relative<br>Intensity | Theoretical<br>Mass | Delta<br>[ppm] | Delta<br>[mmu] | RDB  | Composition                                                                                  |
|-----------|-----------------------|-----------------------|---------------------|----------------|----------------|------|----------------------------------------------------------------------------------------------|
| 551.03032 | 497622                | 100.0                 | 551.03029           | 0.0            | 0.0            | 12.0 | C <sub>21</sub> H <sub>10</sub> O <sub>1</sub> N <sub>1</sub> F <sub>12</sub> P <sub>1</sub> |

## Supplementary Figure 27.a Accurate Mass Report of L5

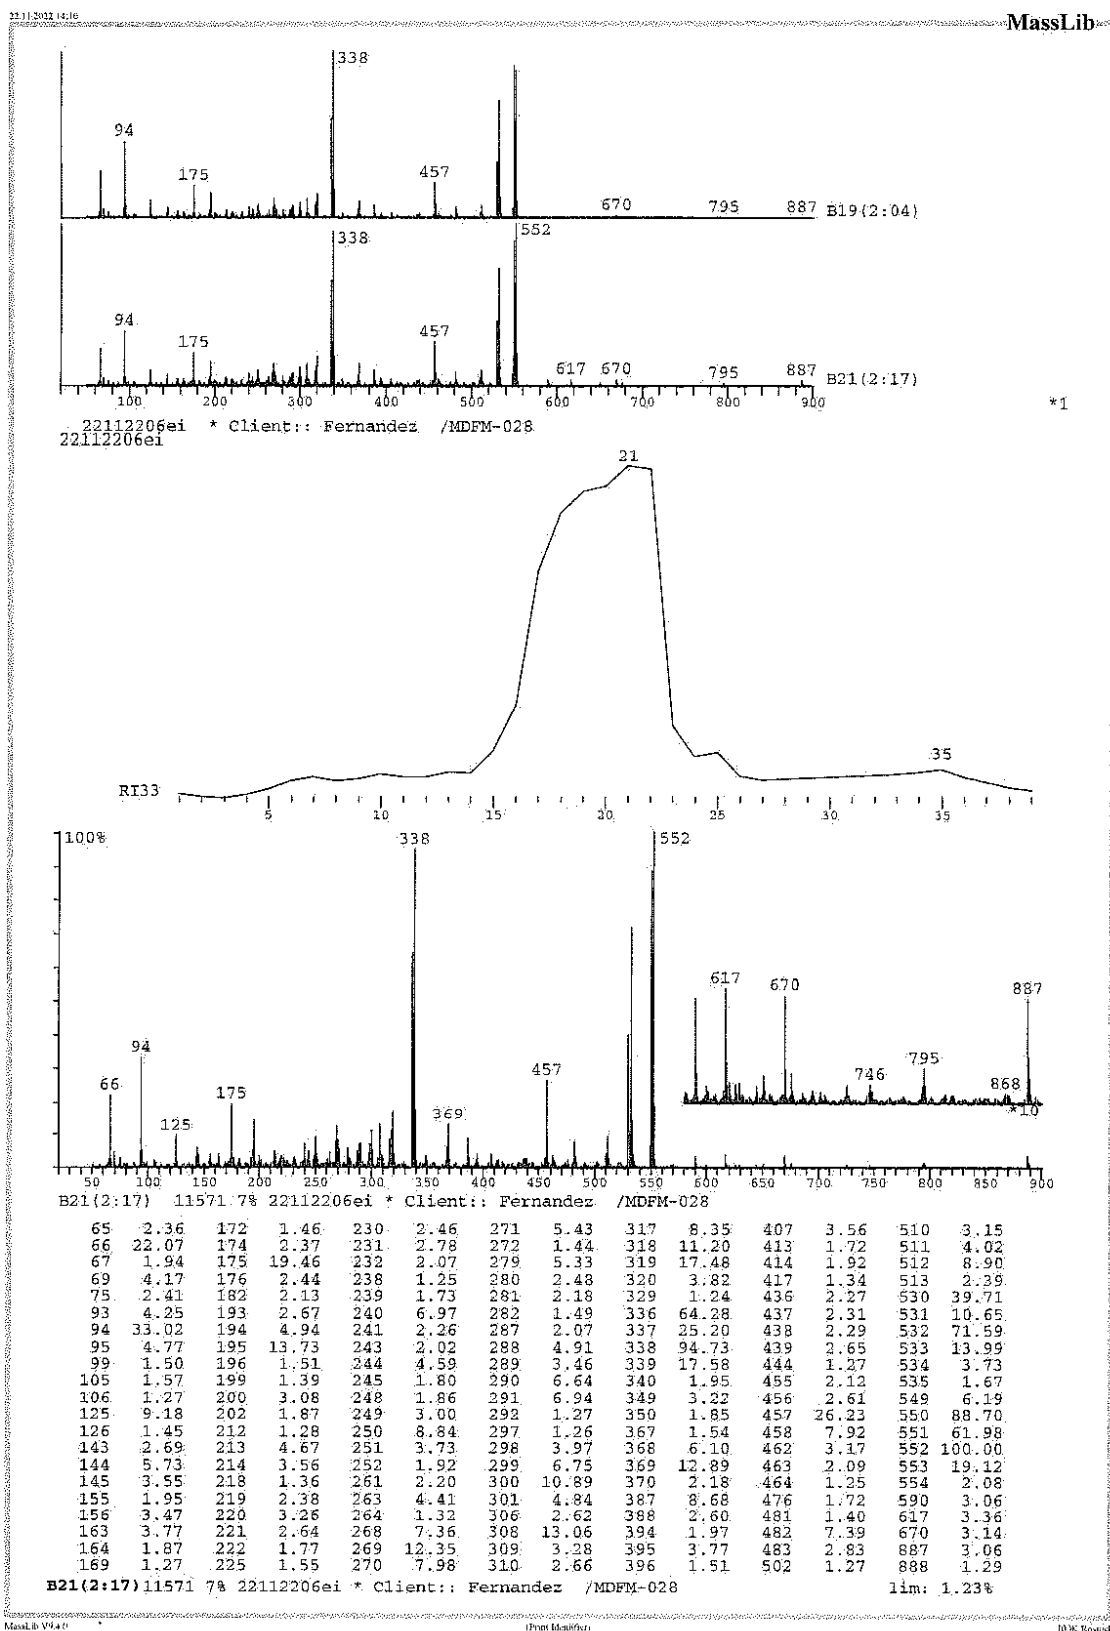

Supplementary Figure 27.b HR-MS spectrum of L5

## ESI-TOF Accurate Mass Report

File: 22110102  
Vial: 1.F.1  
Description: MeOH/0.1% HCOOH in H<sub>2</sub>O 90:10

Sample Name: MDFM-018  
Date: 01-Nov-2022

UserName: Fernandez  
Time: 16:48:29

Page 2

## Sample Report:

(Time: 0.29) Combine (25:29-78:82) - Dead time test passed

1: TOF MS ES+  
6.9e+007

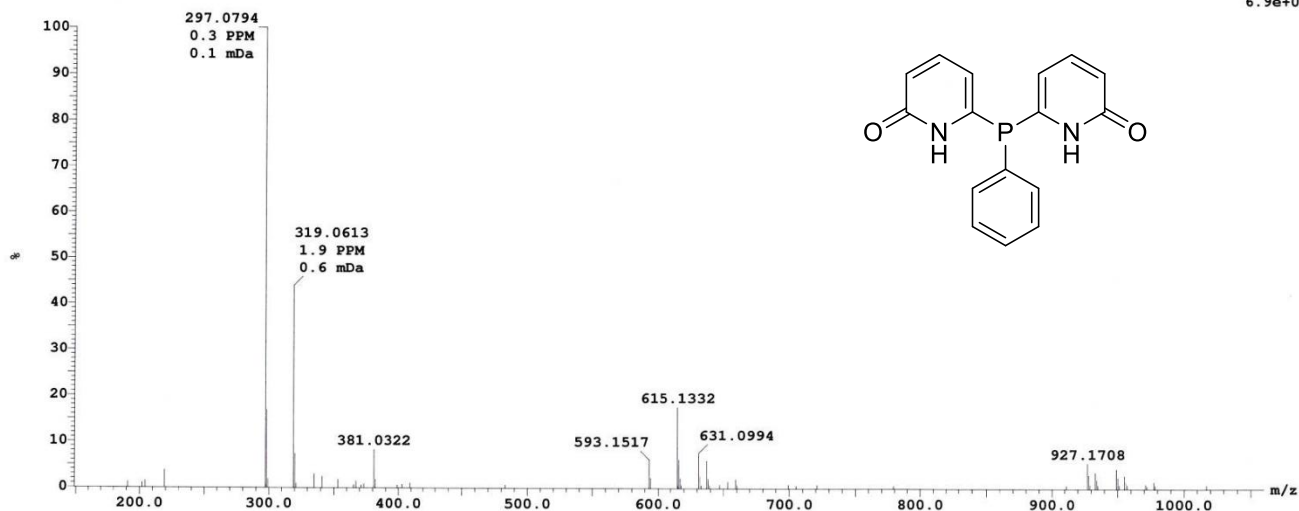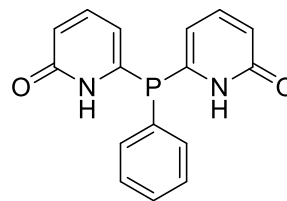

## ESI-TOF Accurate Mass Report

Page 1

Results file: E:\Projects\2211.PRO\SampleDB\2211.rpt  
Last modified: Tuesday, November 01, 2022 16:50:36

## Sample Summary:

| Sample | File     | Sample Name | User      | Target   | Formula                                                        | Expected Mass        | Observed Mass        | Error PPM  | Error mDa  |
|--------|----------|-------------|-----------|----------|----------------------------------------------------------------|----------------------|----------------------|------------|------------|
| 2      | 22110102 | MDFM-018    | Fernandez | 296.0715 | C <sub>16</sub> H <sub>13</sub> PO <sub>2</sub> N <sub>2</sub> | 297.0793<br>319.0607 | 297.0794<br>319.0613 | 0.3<br>1.9 | 0.1<br>0.6 |

## Supplementary Figure 28.a Accurate Mass Report of L6

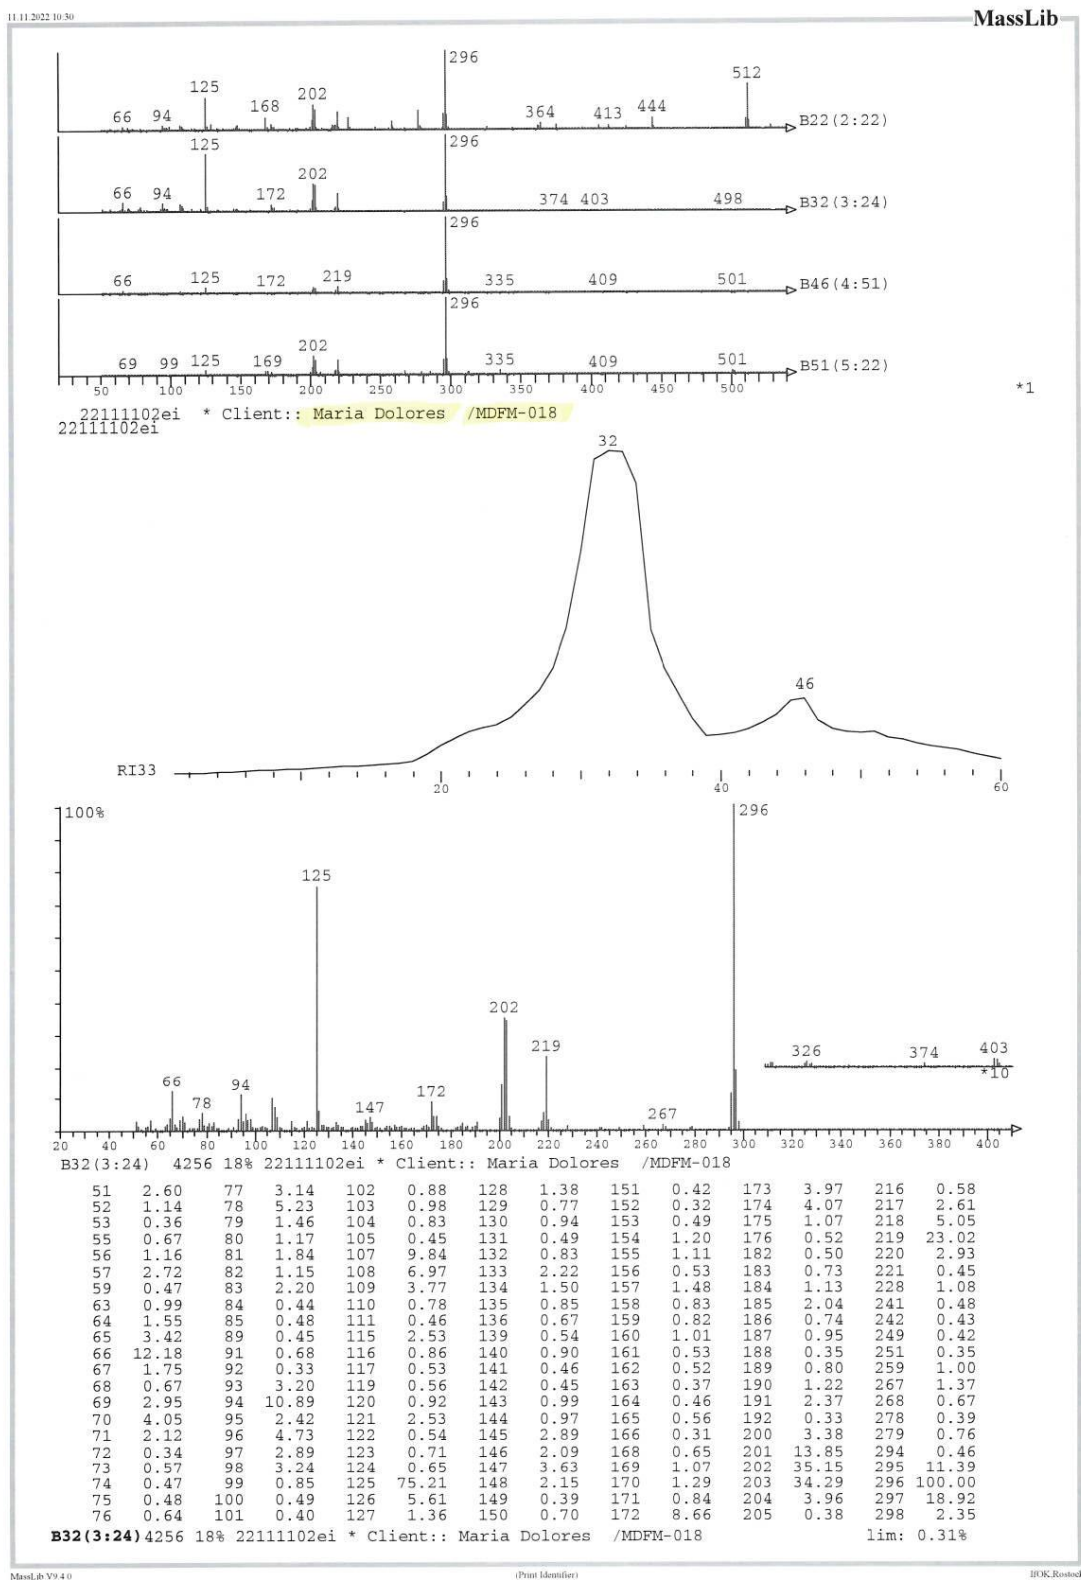

Supplementary Figure 28.b HR-MS spectrum of L6

Sample Report:

(Time: 0.28) Combine (25-73.76) - Dead time test passed

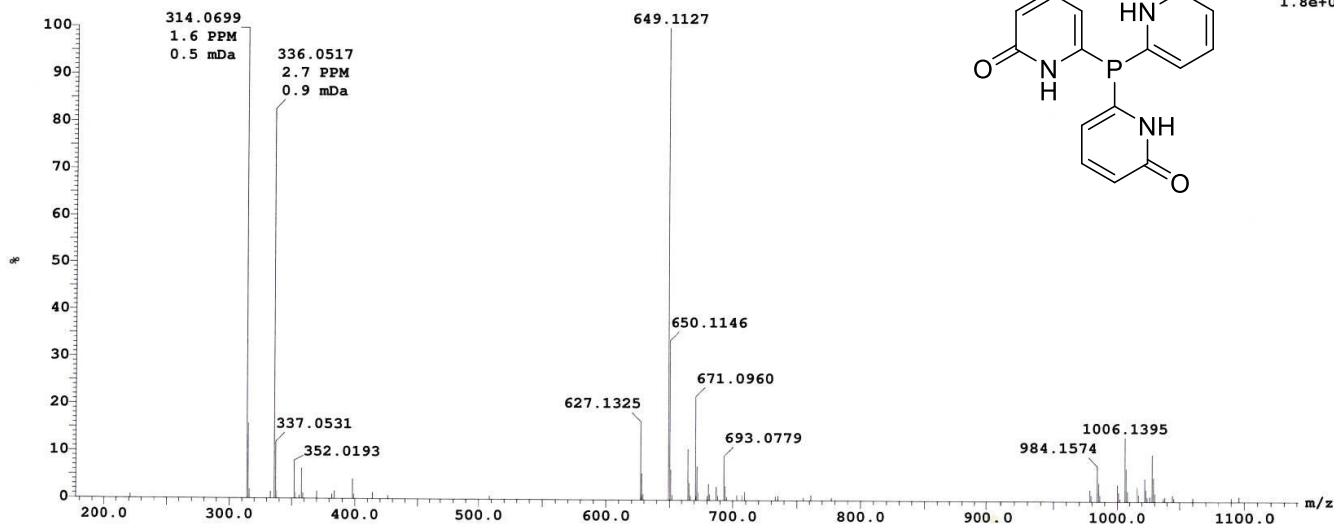

ESI-TOF Accurate Mass Report

Page 1

Results file: E:\Projects\2211.PRO\SampleDB\2211.rpt  
 Last modified: Tuesday, November 01, 2022 16:56:12

Sample Summary:

| Sample | File     | Sample Name | User      | Target   | Formula     | Expected Mass        | Observed Mass        | Error PPM  | Error mDa  |
|--------|----------|-------------|-----------|----------|-------------|----------------------|----------------------|------------|------------|
| 3      | 22110103 | MDFM-019    | Fernandez | 313.0616 | C15H12N3O3P | 314.0694<br>336.0508 | 314.0699<br>336.0517 | 1.6<br>2.7 | 0.5<br>0.9 |

Supplementary Figure 29.a Accurate Mass Report of L7

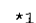

22111104e1

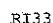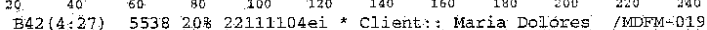

B42(4:27)5538 208 22111104ei \* Client:: Maria Dolores /MDFM-019 lim: 0.238

MDK-Rising

36

## SI-E: Single Crystal X-ray Diffraction (SC-XRD) of new phosphine ligands (L2,L3,L4,L5)

Data were collected on a Bruker Kappa APEX II Duo diffractometer. The structures were solved by intrinsic phasing (SHELXT: Sheldrick, G. M. *Acta Cryst.* **2015**, A71, 3.) and refined by full-matrix least-squares procedures on  $F^2$  (SHELXL-2019: Sheldrick, G. M. *Acta Cryst.* **2015**, C71, 3.). XP (Bruker AXS) was used for graphical representations.

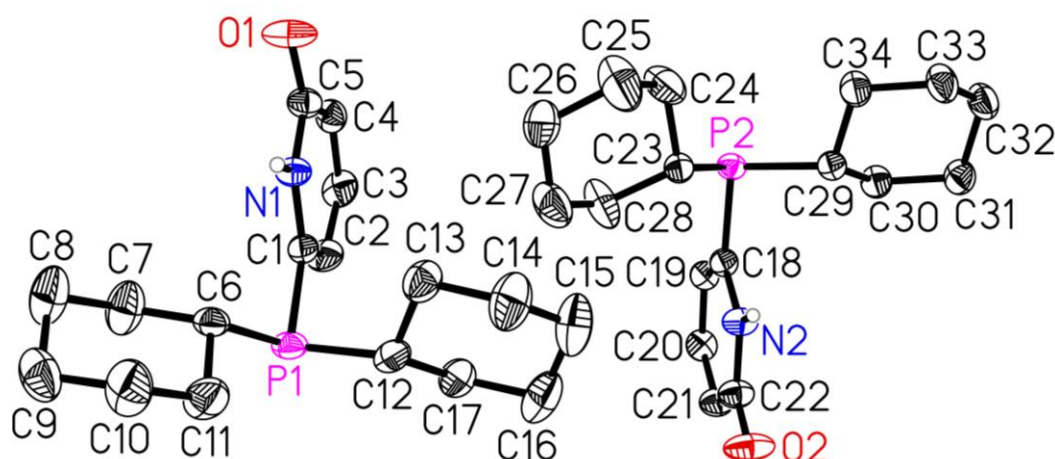

**Supplementary Figure 30. Molecular structure of ligand L2. Displacement ellipsoids correspond to 50% probability. C-bound hydrogen atoms are omitted for clarity.**

|                                 |                                                                                                                                                             |  |
|---------------------------------|-------------------------------------------------------------------------------------------------------------------------------------------------------------|--|
| Empirical formula               | C <sub>17</sub> H <sub>26</sub> NOP                                                                                                                         |  |
| Formula weight                  | 291.36                                                                                                                                                      |  |
| Temperature                     | 150(2) K                                                                                                                                                    |  |
| Wavelength                      | 1.54178 Å                                                                                                                                                   |  |
| Crystal system                  | monoclinic                                                                                                                                                  |  |
| Space group                     | C2/c                                                                                                                                                        |  |
| Unit cell dimensions            | $a = 28.2403(7) \text{ Å}$ $\alpha = 90^\circ$<br>$b = 12.1632(3) \text{ Å}$ $\beta = 116.2798(10)^\circ$<br>$c = 21.6308(5) \text{ Å}$ $\gamma = 90^\circ$ |  |
| Volume                          | 6662.1(3) Å <sup>3</sup>                                                                                                                                    |  |
| Z                               | 16                                                                                                                                                          |  |
| Density (calculated)            | 1.162 g/cm <sup>3</sup>                                                                                                                                     |  |
| Absorption coefficient          | 1.418 mm <sup>-1</sup>                                                                                                                                      |  |
| F(000)                          | 2528                                                                                                                                                        |  |
| Crystal size                    | 0.27 x 0.10 x 0.06 mm                                                                                                                                       |  |
| Theta range for data collection | 3.49 to 67.00°                                                                                                                                              |  |
| Index ranges                    | -33 ≤ h ≤ 31, -14 ≤ k ≤ 14, -25 ≤ l ≤ 25                                                                                                                    |  |
| Reflections collected           | 35692                                                                                                                                                       |  |
| Independent reflections         | 5949 ( $R_{int} = 0.0439$ )                                                                                                                                 |  |
| Completeness to theta = 67.00°  | 99.9 %                                                                                                                                                      |  |
| Max. and min. transmission      | 0.92 and 0.70                                                                                                                                               |  |
| Data / restraints / parameters  | 5949 / 0 / 369                                                                                                                                              |  |

|                                        |                                                    |                 |
|----------------------------------------|----------------------------------------------------|-----------------|
| Goodness-of-fit on $F^2$               | 1.030                                              |                 |
| Final $R$ indices [ $I > 2\sigma(I)$ ] | $R_1 = 0.0439$                                     | $wR_2 = 0.1137$ |
| $R$ indices (all data)                 | $R_1 = 0.0501$                                     | $wR_2 = 0.1201$ |
| Largest diff. peak and hole            | 0.829 and $-0.536 \text{ e} \cdot \text{\AA}^{-3}$ |                 |
| CCDC no.                               |                                                    |                 |

**Supplementary Table 1. Crystal data for L2.** Single crystals of the ligand **L2** were obtained from the recrystallization in acetone.

#### Hydrogen-bond geometry ( $\text{\AA}$ , $^\circ$ )

| $D-H\cdots A$        | $D-H$   | $H\cdots A$ | $D\cdots A$ | $D-H\cdots A$ |
|----------------------|---------|-------------|-------------|---------------|
| $N1-H1A\cdots O1^i$  | 0.84(2) | 1.98(2)     | 2.805(2)    | 169(2)        |
| $N2-H2A\cdots O2^j$  | 0.88(2) | 1.92(3)     | 2.798(2)    | 175(2)        |
| $C6-H6\cdots O1^i$   | 1.00    | 2.26        | 3.223(2)    | 161           |
| $C23-H23\cdots O2^j$ | 1.00    | 2.40        | 3.317(3)    | 152           |

Symmetry codes: (i)  $1/2-x, 3/2-y, 1-z$ ; (j)  $-x, 1-y, -z$

Strong intermolecular N-H...O hydrogen bonds are formed resulting in dimeric structures.

For **L2** only dimers by strong intermolecular N-H...O hydrogen bonds stabilized by additional weak intermolecular C-H...O hydrogen bonds were found.

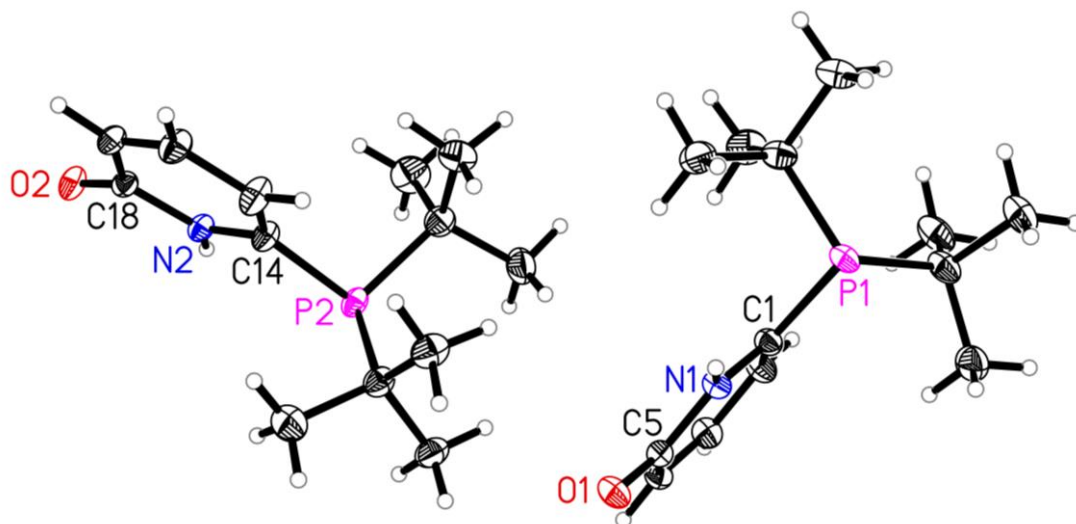

**Supplementary Figure 32. Molecular structure of ligand L4.** Displacement ellipsoids correspond to 50% probability.

|                   |                   |
|-------------------|-------------------|
| Empirical formula | $C_{13}H_{22}NOP$ |
| Formula weight    | 239.28            |
| Temperature       | 110(2) K          |

|                                     |                                                                                                                                                  |
|-------------------------------------|--------------------------------------------------------------------------------------------------------------------------------------------------|
| Wavelength                          | 0.71073 Å                                                                                                                                        |
| Crystal system                      | triclinic                                                                                                                                        |
| Space group                         | $P\bar{1}$                                                                                                                                       |
| Unit cell dimensions                | $a = 7.6695(7)$ Å $\alpha = 94.676(2)^\circ$<br>$b = 13.2632(12)$ Å $\beta = 101.927(2)^\circ$<br>$c = 14.0998(12)$ Å $\gamma = 93.562(2)^\circ$ |
| Volume                              | 1394.0(2) Å <sup>3</sup>                                                                                                                         |
| Z                                   | 4                                                                                                                                                |
| Density (calculated)                | 1.140 g/cm <sup>3</sup>                                                                                                                          |
| Absorption coefficient              | 0.179 mm <sup>-1</sup>                                                                                                                           |
| F(000)                              | 520                                                                                                                                              |
| Crystal size                        | 0.47 x 0.29 x 0.06 mm                                                                                                                            |
| Theta range for data collection     | 1.48 to 28.99°                                                                                                                                   |
| Index ranges                        | -10 ≤ h ≤ 10, -18 ≤ k ≤ 18, -19 ≤ l ≤ 19                                                                                                         |
| Reflections collected               | 64917                                                                                                                                            |
| Independent reflections             | 7434 ( $R_{int} = 0.0439$ )                                                                                                                      |
| Completeness to theta = 25.24°      | 100 %                                                                                                                                            |
| Max. and min. transmission          | 0.99 and 0.92                                                                                                                                    |
| Data / restraints / parameters      | 7434 / 0 / 309                                                                                                                                   |
| Goodness-of-fit on $F^2$            | 1.026                                                                                                                                            |
| Final $R$ indices [ $>2\sigma(I)$ ] | $R_1 = 0.0373$ $wR_2 = 0.0924$                                                                                                                   |
| $R$ indices (all data)              | $R_1 = 0.0502$ $wR_2 = 0.1013$                                                                                                                   |
| Largest diff. peak and hole         | 0.405 and -0.186 e·Å <sup>-3</sup>                                                                                                               |
| CCDC no.                            |                                                                                                                                                  |

**Supplementary Table 3. Crystal data for L4.** Single crystals of the ligand **L4** were obtained from the recrystallization in acetone.

#### Hydrogen-bond geometry (Å, °)

| $D-H\cdots A$                     | $D-H$   | $H\cdots A$ | $D\cdots A$ | $D-H\cdots A$ |
|-----------------------------------|---------|-------------|-------------|---------------|
| N1—H1 $\cdots$ O1 <sup>i</sup>    | 0.84(2) | 2.01(2)     | 2.8437(14)  | 173.1(17)     |
| N2—H2A $\cdots$ O2 <sup>j</sup>   | 0.86(2) | 1.94(2)     | 2.7915(13)  | 173.1(16)     |
| C16— H16 $\cdots$ P2 <sup>k</sup> | 0.95    | 2.81        | 3.7295(14)  | 163           |
| C17— H17 $\cdots$ O2 <sup>l</sup> | 0.95    | 2.38        | 3.3188(16)  | 170           |

Symmetry codes: (i) 1-x, 1-y, 2-z; (j) 1-x, 2-y, 1-z; (k) 1+x,y,z; (l) 2-x,2-y,1-z

Strong intermolecular N-H...O hydrogen bonds are formed resulting in dimeric structures.

For **L4**, for one molecule of the asymmetric unit, these dimers are linked by further weak intermolecular C-H...O and C-H...P hydrogen bonds.

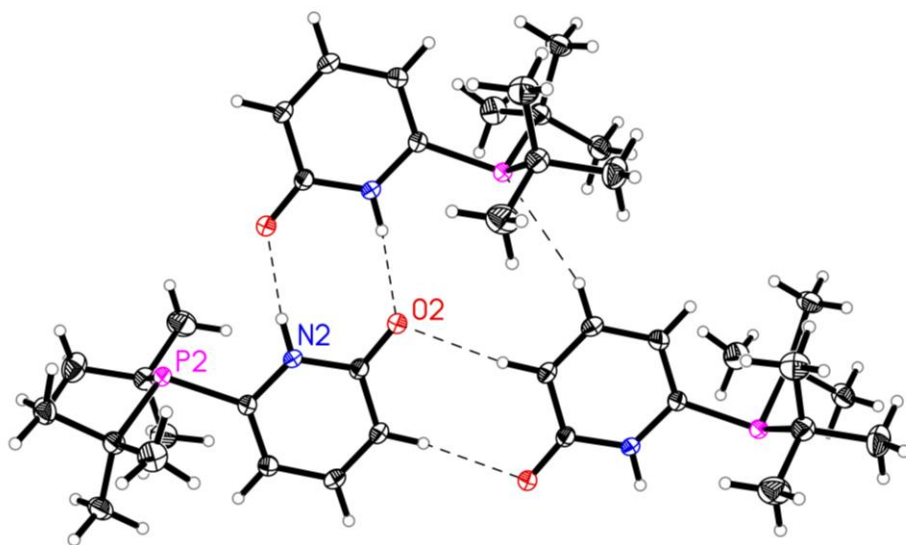

**Supplementary Figure 33.** Molecular structure of one molecule of the asymmetric unit of L4 and two further molecules which are generated by symmetry (symmetry codes: 1-x, 2-y, 1-z; 2-x,2-y,1-z). The thermal ellipsoids correspond to 50% probability. Intermolecular hydrogen bonds are depicted as dashed lines.

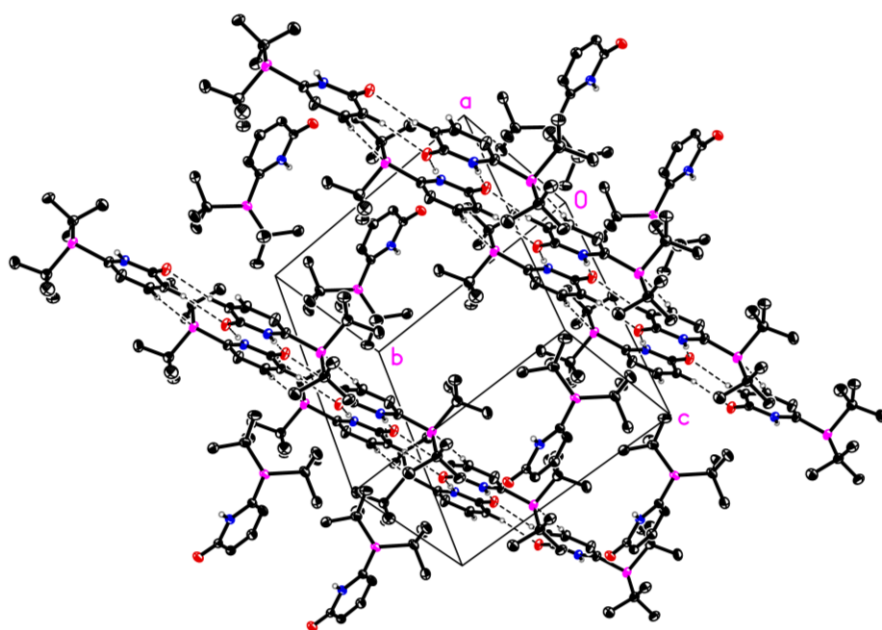

**Supplementary Figure 34.** Part of the packing diagram of L4. The thermal ellipsoids correspond to 50% probability. Intermolecular hydrogen bonds are depicted as dashed lines. Hydrogen atoms which are not involved in hydrogen bonds are omitted for clarity.

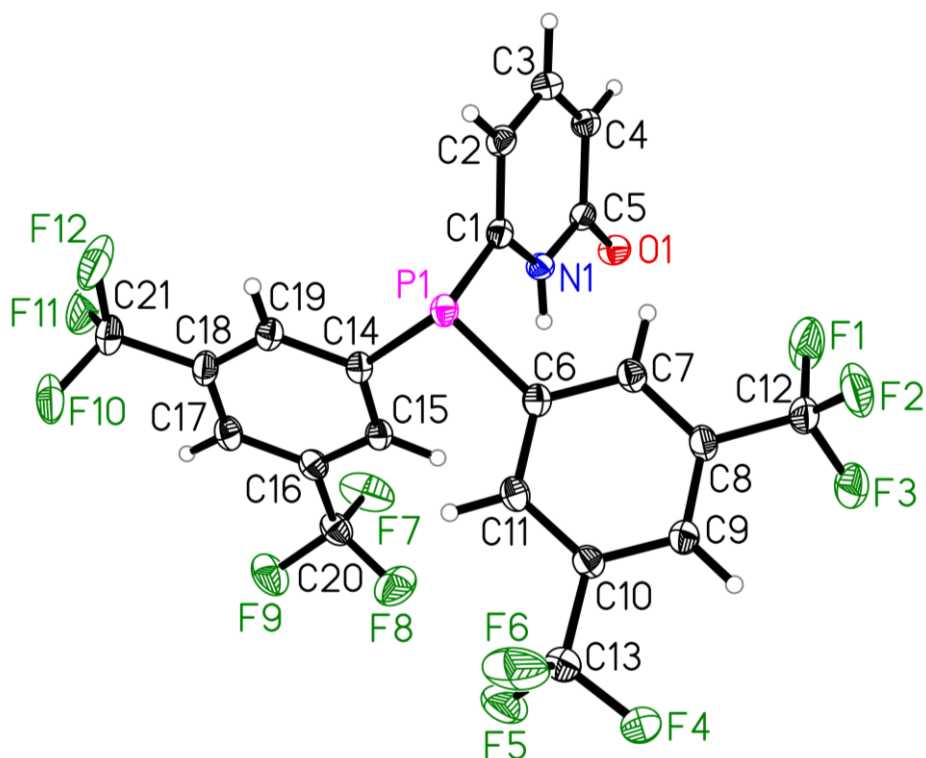

**Supplementary Figure 35. Molecular structure of ligand L5. Displacement ellipsoids correspond to 50% probability.**

|                                 |                                                                                                                                                  |  |
|---------------------------------|--------------------------------------------------------------------------------------------------------------------------------------------------|--|
| Empirical formula               | $C_{21}H_{10}F_{12}NOP$                                                                                                                          |  |
| Formula weight                  | 551.27                                                                                                                                           |  |
| Temperature                     | 110(2) K                                                                                                                                         |  |
| Wavelength                      | 0.71073 Å                                                                                                                                        |  |
| Crystal system                  | triclinic                                                                                                                                        |  |
| Space group                     | $P\bar{1}$                                                                                                                                       |  |
| Unit cell dimensions            | $a = 9.8822(10)$ Å $\alpha = 69.592(2)^\circ$<br>$b = 10.1987(10)$ Å $\beta = 77.058(3)^\circ$<br>$c = 11.9192(12)$ Å $\gamma = 89.014(3)^\circ$ |  |
| Volume                          | $1094.85(19)$ Å <sup>3</sup>                                                                                                                     |  |
| Z                               | 2                                                                                                                                                |  |
| Density (calculated)            | 1.672 g/cm <sup>3</sup>                                                                                                                          |  |
| Absorption coefficient          | 0.243 mm <sup>-1</sup>                                                                                                                           |  |
| F(000)                          | 548                                                                                                                                              |  |
| Crystal size                    | 0.39 x 0.35 x 0.33 mm                                                                                                                            |  |
| Theta range for data collection | 1.87 to 30.00°                                                                                                                                   |  |
| Index ranges                    | $-13 \leq h \leq 13, -14 \leq k \leq 14, -16 \leq l \leq 16$                                                                                     |  |
| Reflections collected           | 57852                                                                                                                                            |  |
| Independent reflections         | 6380 ( $R_{int} = 0.0279$ )                                                                                                                      |  |
| Completeness to theta = 25.24°  | 100 %                                                                                                                                            |  |
| Max. and min. transmission      | 0.92 and 0.91                                                                                                                                    |  |

|                                     |                                           |                 |
|-------------------------------------|-------------------------------------------|-----------------|
| Data / restraints / parameters      | 6380/ 0 / 329                             |                 |
| Goodness-of-fit on $F^2$            | 1.044                                     |                 |
| Final $R$ indices [ $>2\sigma(I)$ ] | $R_1 = 0.0443$                            | $wR_2 = 0.1158$ |
| $R$ indices (all data)              | $R_1 = 0.0512$                            | $wR_2 = 0.1226$ |
| Largest diff. peak and hole         | 0.792 and -0.440 e $\cdot\text{\AA}^{-3}$ |                 |
| CCDC no.                            |                                           |                 |

**Supplementary Table 4. Crystal data for L5.** Single crystals of the ligand **L5** were obtained from the recrystallization in acetone.

#### Hydrogen-bond geometry ( $\text{\AA}$ , $^\circ$ )

| $D-H\cdots A$        | $D-H$   | $H\cdots A$ | $D\cdots A$ | $D-H\cdots A$ |
|----------------------|---------|-------------|-------------|---------------|
| $N1-H1\cdots O1^i$   | 0.85(2) | 1.98(2)     | 2.8211(16)  | 170(2)        |
| $C15-H15\cdots O1^i$ | 0.95    | 2.26        | 3.1137(17)  | 150           |
| $C17-H17\cdots F5^j$ | 0.95    | 2.42        | 3.345(2)    | 163           |

Symmetry code: (i) 1-x, 2-y, -z; (j) 1-x,1-y,1-z

For **L5**, dimers are formed by strong intermolecular  $N-H\cdots O$  hydrogen bonds, which are linked by further weak intermolecular  $C-H\cdots F$  interactions. Furthermore, weak intermolecular  $C-H\cdots O$  hydrogen bonds are observed.

## SI-F: General procedures for hydroformylation experiments

Under argon atmosphere, vials (15 mL) were charged with  $[\text{Rh}(\text{CO})_2\text{acac}]$  (0.2 mg, 0.014 mol%), monodentate ligand (0.071 mol%) and a stirring bar. Then **1a** (6.0 mmol) and toluene (4.3 mL) were added. The vials were placed in an alloyed plate, which was then transferred into an argon-flushed autoclave (300 mL). The autoclave was flushed with syngas three times at room temperature and then pressurized with syngas to 10 bar. The reaction was performed at 120 °C for 4 h. After the reaction finished, the autoclave was cooled to room temperature on an ice bath and the pressure was carefully released. Isooctane was added to the reaction mixture as an internal standard and yield and regioselectivity were measured by GC.

### a) Influence of temperature

| #  | Ligand           | Conversion (%) | Isomers (%) | Octane (%) | Lin. selec. (%) | Yield 2 (%) | Ligand |
|----|------------------|----------------|-------------|------------|-----------------|-------------|--------|
| 1  | L1               | 40             | 1           | -          | -               | >99         | <1     |
| 2  | L6               | 40             | 1           | -          | -               | >99         | <1     |
| 3  | L7               | 40             | 1           | <1         | -               | -           | -      |
| 4  | PPh <sub>3</sub> | 40             | <1          | -          | -               | -           | -      |
| 6  | -                | 40             | <1          | -          | -               | -           | -      |
| 7  | L1               | 60             | 31          | 1          | 1               | 99          | 29     |
| 8  | L6               | 60             | 11          | <1         | <1              | >99         | 10     |
| 9  | L7               | 60             | 16          | 3          | 9               | 74          | 3      |
| 10 | PPh <sub>3</sub> | 60             | 16          | <1         | <1              | 75          | 15     |
| 11 | -                | 60             | 24          | 14         | 4               | 74          | 5      |
| 12 | L1               | 80             | 95          | 4          | 6               | 92          | 85     |
| 13 | L6               | 80             | 38          | 1          | 2               | 99          | 35     |
| 14 | L7               | 80             | 93          | 40         | 37              | 59          | 15     |
| 15 | PPh <sub>3</sub> | 80             | 99          | 10         | 11              | 54          | 77     |
| 16 | -                | 80             | 99          | 44         | 32              | 53          | 21     |
| 17 | L1               | 100            | 98          | 5          | 7               | 89          | 86     |
| 18 | L6               | 100            | 58          | 3          | 3               | 99          | 52     |
| 19 | L7               | 100            | 95          | 48         | 33              | 49          | 13     |
| 20 | PPh <sub>3</sub> | 100            | >99         | 10         | 9               | 58          | 80     |
| 21 | -                | 100            | 98          | 51         | 35              | 44          | 13     |
| 22 | L1               | 120            | 98          | 4          | 13              | 81          | 80     |
| 23 | L6               | 120            | 90          | 4          | 13              | 99          | 73     |
| 24 | L7               | 120            | 98          | 68         | 29              | 1           | 5      |
| 25 | PPh <sub>3</sub> | 120            | 99          | 3          | 23              | 66          | 73     |
| 26 | -                | 120            | 98          | 7          | 86              | 40          | 5      |
| 27 | L1               | 140            | 98          | 16         | 24              | 81          | 58     |
| 28 | L6               | 140            | 98          | 11         | 18              | 98          | 69     |
| 29 | L7               | 140            | 97          | 65         | 32              | 53          | 4      |
| 30 | PPh <sub>3</sub> | 140            | 98          | 50         | 25              | 62          | 23     |
| 31 | -                | 140            | 98          | 59         | 28              | 39          | 11     |

**Supplementary Table 5. Temperature screening for the hydroformylation of 1-octene**

Variation from general conditions: Temperature was adjusted to the working temperature.

## b) Variation of ligands

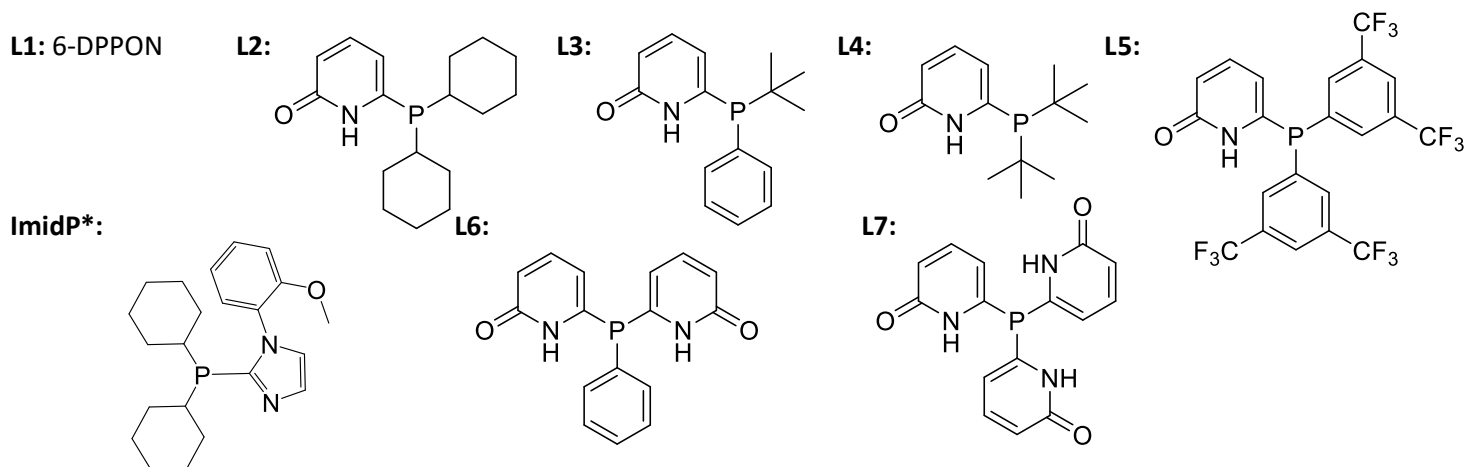

| #  | Ligand           | Conversion (%) | Isomers (%) | Octane (%) | Lin. selec. (%) | Yield 2 (%) |
|----|------------------|----------------|-------------|------------|-----------------|-------------|
| 1  | L1               | 95             | 7           | 7          | 99              | 81          |
| 2  | PPh <sub>3</sub> | 34             | <1          | 1          | 74              | 33          |
| 3  | PCy <sub>3</sub> | 61             | <1          | <1         | 57              | 60          |
| 4  | ImidP*           | 33             | <1          | 1          | 50              | 29          |
| 5  | L2               | 12             | 4           | <1         | 60              | 8           |
| 6  | L3               | 6              | <1          | 1          | 76              | 5           |
| 7  | L4               | 11             | <1          | <1         | 74              | 11          |
| 8  | L6               | 15             | <1          | 1          | 99              | 14          |
| 9  | L7               | 49             | 7           | 35         | 75              | 7           |
| 10 | -                | 94             | 14          | 60         | 71              | 20          |

**Supplementary Table 6. Preliminary ligand screening for the hydroformylation of 1-octene**

Variation from general conditions: 1-octene (3.5 mmol), [Rh(COD)2BF4](0.05 mol%), L:Rh (20:1), CO/H<sub>2</sub> (10 bar), Toluene (2.5 mL), 65 °C, 4h. The conversion, yields and regioselectivity of the products were measured by GC analysis using MeOH as solvent and isooctane as internal standard.

### c) Ligand-Metal ratio influence

| #  | Ligand | L:M  | Conv. (%) | L. selec. (%) | Yield (%) |
|----|--------|------|-----------|---------------|-----------|
| 1  | L1     | 10:1 | 99        | 81            | 98        |
| 2  | L6     |      | 90        | 99            | 73        |
| 3  | L1     | 5:1  | 99        | 80            | 83        |
| 4  | L6     |      | 95        | 98            | 77        |
| 5  | L1     | 3:1  | 98        | 52            | 32        |
| 6  | L6     |      | 95        | 98            | 75        |
| 7  | L1     | 2:1  | 98        | 48            | 30        |
| 8  | L6     |      | 71        | 76            | 10        |
| 9  | L1     | 1:1  | 98        | 38            | 14        |
| 10 | L6     |      | 54        | 78            | 7         |

**Supplementary Table 7. Ligand-Metal ratio screening for the hydroformylation of 1-octene**

Variation from general conditions: Adjusted ligand loading.

### d) Influence of pressure

| #  | Ligand | P <sub>CO/H<sub>2</sub></sub> (bar) | Conv. (%) | L. selec. (%) | Yield (%) |
|----|--------|-------------------------------------|-----------|---------------|-----------|
| 1  | L1     | 40                                  | 99        | 73            | 93        |
| 2  | L6     |                                     | 98        | 96            | 94        |
| 3  | L1     | 20                                  | 98        | 82            | 83        |
| 4  | L6     |                                     | 98        | 98            | 87        |
| 5  | L1     | 15                                  | 98        | 80            | 80        |
| 6  | L6     |                                     | 98        | 98            | 85        |
| 7  | L1     | 10                                  | 99        | 80            | 72        |
| 8  | L6     |                                     | 95        | 98            | 77        |
| 9  | L1     | 5                                   | 99        | 81            | 54        |
| 10 | L6     |                                     | 92        | 98            | 54        |
| 11 | L1     | 1                                   | 8         | -             | -         |
| 12 | L6     |                                     | 35        | -             | -         |

**Supplementary Table 8. Influence of syngas pressure on the hydroformylation of 1-octene**

Variation from general conditions: Adjusted syngas pressure.

### e) Solvent screening

| #  | Ligand | solvent          | Conv. (%) | L. selec. (%) | Yield (%) |
|----|--------|------------------|-----------|---------------|-----------|
| 1  | L6     | Toluene          | 95        | 98            | 77        |
| 2  | L6     | Dioxane          | 78        | 93            | 57        |
| 3  | L6     | THF              | 73        | 92            | 57        |
| 4  | L6     | PC               | 82        | 93            | 55        |
| 5  | L6     | MeOH             | 30        | 75            | 7         |
| 6  | L6     | H <sub>2</sub> O | 97        | 73            | 67        |
| 7  | L6     | NMP              | 21        | 79            | 13        |
| 8  | L6     | HFIP             | 66        | 81            | 33        |
| 9  | L6     | Heptane          | 49        | 88            | 35        |
| 10 | L6     | -                | [75-98]   | [85-90]       | [60-82]   |

**Supplementary Table 9. Influence of solvents on the hydroformylation of 1-octene**

Variation from general conditions: Appropriate solvent used.

### f) Ligand screening in optimized conditions

| # | Ligand           | Conv. (%) | Iso. (%) | L. selec. (%) | Yield (%) |
|---|------------------|-----------|----------|---------------|-----------|
| 1 | L1               | 95        | 7        | 84            | 81        |
| 2 | L2               | 98        | 8        | 67            | 77        |
| 3 | L3               | 98        | 14       | 66            | 70        |
| 4 | L4               | 44        | 14       | 72            | 3         |
| 5 | L5               | 78        | 18       | 90            | 34        |
| 6 | L6               | 88        | 6        | 99            | 78        |
| 7 | L7               | 98        | 57       | 33            | 1         |
| 8 | PPh <sub>3</sub> | 98        | 49       | 6             | 39        |

**Supplementary Table 10. Ligand screening for the hydroformylation of 1-octene in optimized conditions**

## SI-G: Kinetic profile and gas consumption experiments

| t(h) | Conv.<br>(%) | Hydrog.<br>(%) | Iso.<br>(%) | Yield<br>(%) | L. selec.<br>(%) | nonanal<br>(%) |
|------|--------------|----------------|-------------|--------------|------------------|----------------|
| 0    | 0            | 0              | 0           | 0            | 0                | 0              |
| 1    | 55           | 8              | 4           | 44           | 97               | 43             |
| 2    | 70           | 10             | 6           | 53           | 97               | 51             |
| 3    | 77           | 13             | 6           | 58           | 96               | 56             |
| 4    | 82           | 13             | 7           | 62           | 96               | 60             |
| 5    | 84           | 14             | 7           | 63           | 96               | 60             |

**Supplementary Table 11.** Kinetic profile experiment for the hydroformylation of 1-octene with Rh/L6

| t(h) | Conv.<br>(%) | Hydrog.<br>(%) | Iso.<br>(%) | Yield<br>(%) | L. selec.<br>(%) | nonanal<br>(%) |
|------|--------------|----------------|-------------|--------------|------------------|----------------|
| 0    | 0            | 0              | 0           | 0            | 0                | 0              |
| 1    | 64           | 15             | 7           | 42           | 82               | 34             |
| 2    | 85           | 20             | 9           | 56           | 80               | 45             |
| 3    | 92           | 21             | 9           | 62           | 79               | 49             |
| 4    | 94           | 21             | 9           | 64           | 79               | 51             |
| 5    | 96           | 22             | 9           | 65           | 79               | 51             |

**Supplementary Table 12.** Kinetic profile experiment for the hydroformylation of 1-octene with Rh/L1

Variation from general conditions:  $c_{Rh} = 6 \cdot 10^{-5} \text{ mol.L}^{-1}$ , **1a** (10.0 mmol) and toluene (24 mL).

A 100 mL was used for those experiments. A pressure probe and a sampling cannula were adapted. The precursor, ligand and solvent were added as a solution along with **1a** under a strong flow of argon. The autoclave was first flushed with  $N_2$ , then pressurized to 10 bars of syngas, brought to working temperature (120 °C). Finally, the pressure was adjusted to 25 bars of syngas and stirring was turned on. Samples were collected hourly, including a first one at  $t = 0 \text{ h}$  (approximately one to two minutes after the start of the reaction) and analyzed on GC. Pressure was monitored and provided data points every minute.

|           | L1         |                           | L6         |                           |
|-----------|------------|---------------------------|------------|---------------------------|
| t<br>(mn) | P<br>(bar) | Gas<br>consumption<br>(%) | P<br>(bar) | Gas<br>consumption<br>(%) |
| 0         | 25.3       | 0%                        | 24.1       | 0%                        |
| 1         | 25.2       | 0%                        | 24         | 0%                        |
| 2         | 25.2       | 0%                        | 24         | 0%                        |
| 3         | 25.1       | 1%                        | 24         | 0%                        |
| 4         | 25.1       | 1%                        | 24         | 0%                        |
| 5         | 25         | 1%                        | 24.1       | 0%                        |
| 6         | 24.9       | 2%                        | 24         | 0%                        |
| 7         | 24.9       | 2%                        | 24         | 0%                        |
| 8         | 24.8       | 2%                        | 24         | 0%                        |
| 9         | 24.8       | 2%                        | 23.9       | 1%                        |
| 10        | 24.7       | 2%                        | 23.8       | 1%                        |
| 11        | 24.7       | 2%                        | 23.8       | 1%                        |
| 12        | 24.6       | 3%                        | 23.7       | 2%                        |
| 13        | 24.6       | 3%                        | 23.7       | 2%                        |
| 14        | 24.6       | 3%                        | 23.5       | 2%                        |
| 15        | 24.6       | 3%                        | 23.5       | 2%                        |
| 16        | 24.5       | 3%                        | 23.4       | 3%                        |
| 17        | 24.5       | 3%                        | 23.3       | 3%                        |
| 18        | 24.4       | 4%                        | 23.3       | 3%                        |
| 19        | 24.4       | 4%                        | 23.2       | 4%                        |
| 20        | 24.4       | 4%                        | 23.1       | 4%                        |
| 21        | 24.3       | 4%                        | 23.1       | 4%                        |
| 22        | 24.3       | 4%                        | 23.1       | 4%                        |
| 23        | 24.3       | 4%                        | 23         | 5%                        |
| 24        | 24.2       | 4%                        | 22.9       | 5%                        |
| 25        | 24.2       | 4%                        | 23         | 5%                        |
| 26        | 24.2       | 4%                        | 22.9       | 5%                        |
| 27        | 24.2       | 4%                        | 22.8       | 5%                        |
| 28        | 24.2       | 4%                        | 22.8       | 5%                        |
| 29        | 24.1       | 5%                        | 22.7       | 6%                        |
| 30        | 24.1       | 5%                        | 22.7       | 6%                        |
| 31        | 24         | 5%                        | 22.7       | 6%                        |
| 32        | 24         | 5%                        | 22.7       | 6%                        |
| 33        | 24         | 5%                        | 22.7       | 6%                        |
| 34        | 24         | 5%                        | 22.6       | 6%                        |
| 35        | 24         | 5%                        | 22.6       | 6%                        |
| 36        | 23.9       | 6%                        | 22.6       | 6%                        |
| 37        | 23.9       | 6%                        | 22.6       | 6%                        |
| 38        | 23.9       | 6%                        | 22.6       | 6%                        |
| 39        | 23.8       | 6%                        | 22.5       | 7%                        |

|    |      |     |      |     |
|----|------|-----|------|-----|
| 40 | 23.9 | 6%  | 22.6 | 6%  |
| 41 | 23.9 | 6%  | 22.5 | 7%  |
| 42 | 23.9 | 6%  | 22.5 | 7%  |
| 43 | 23.8 | 6%  | 22.5 | 7%  |
| 44 | 23.7 | 6%  | 22.5 | 7%  |
| 45 | 23.7 | 6%  | 22.5 | 7%  |
| 46 | 23.7 | 6%  | 22.4 | 7%  |
| 47 | 23.7 | 6%  | 22.4 | 7%  |
| 48 | 23.7 | 6%  | 22.4 | 7%  |
| 49 | 23.6 | 7%  | 22.4 | 7%  |
| 50 | 23.6 | 7%  | 22.3 | 7%  |
| 51 | 23.6 | 7%  | 22.3 | 7%  |
| 52 | 23.5 | 7%  | 22.3 | 7%  |
| 53 | 23.6 | 7%  | 22.3 | 7%  |
| 54 | 23.5 | 7%  | 22.2 | 8%  |
| 55 | 23.5 | 7%  | 22.2 | 8%  |
| 56 | 23.5 | 7%  | 22.2 | 8%  |
| 57 | 23.5 | 7%  | 22.2 | 8%  |
| 58 | 23.4 | 8%  | 22.2 | 8%  |
| 59 | 23.3 | 8%  | 22.2 | 8%  |
| 60 | 23.3 | 8%  | 22.2 | 8%  |
| 61 | 23.2 | 8%  | 22.1 | 8%  |
| 62 | 23.3 | 8%  | 22.1 | 8%  |
| 63 | 23.2 | 8%  | 22.2 | 8%  |
| 64 | 23.2 | 8%  | 22   | 9%  |
| 65 | 23.2 | 8%  | 21.9 | 9%  |
| 66 | 23.2 | 8%  | 21.9 | 9%  |
| 67 | 23.1 | 9%  | 21.9 | 9%  |
| 68 | 23.1 | 9%  | 21.8 | 10% |
| 69 | 23.1 | 9%  | 21.8 | 10% |
| 70 | 23.1 | 9%  | 21.9 | 9%  |
| 71 | 23   | 9%  | 21.9 | 9%  |
| 72 | 23.1 | 9%  | 21.8 | 10% |
| 73 | 23   | 9%  | 21.8 | 10% |
| 74 | 23   | 9%  | 21.8 | 10% |
| 75 | 23   | 9%  | 21.8 | 10% |
| 76 | 23   | 9%  | 21.8 | 10% |
| 77 | 23   | 9%  | 21.8 | 10% |
| 78 | 23   | 9%  | 21.7 | 10% |
| 79 | 23   | 9%  | 21.7 | 10% |
| 80 | 23   | 9%  | 21.7 | 10% |
| 81 | 22.9 | 9%  | 21.7 | 10% |
| 82 | 22.9 | 9%  | 21.8 | 10% |
| 83 | 22.9 | 9%  | 21.7 | 10% |
| 84 | 22.8 | 10% | 21.7 | 10% |
| 85 | 22.9 | 9%  | 21.7 | 10% |

|     |      |     |      |     |
|-----|------|-----|------|-----|
| 86  | 22.8 | 10% | 21.7 | 10% |
| 87  | 22.9 | 9%  | 21.6 | 10% |
| 88  | 22.9 | 9%  | 21.7 | 10% |
| 89  | 22.8 | 10% | 21.7 | 10% |
| 90  | 22.9 | 9%  | 21.6 | 10% |
| 91  | 22.8 | 10% | 21.6 | 10% |
| 92  | 22.8 | 10% | 21.6 | 10% |
| 93  | 22.8 | 10% | 21.6 | 10% |
| 94  | 22.8 | 10% | 21.7 | 10% |
| 95  | 22.8 | 10% | 21.6 | 10% |
| 96  | 22.7 | 10% | 21.6 | 10% |
| 97  | 22.7 | 10% | 21.6 | 10% |
| 98  | 22.7 | 10% | 21.6 | 10% |
| 99  | 22.7 | 10% | 21.5 | 11% |
| 100 | 22.7 | 10% | 21.5 | 11% |
| 101 | 22.7 | 10% | 21.6 | 10% |
| 102 | 22.7 | 10% | 21.5 | 11% |
| 103 | 22.7 | 10% | 21.5 | 11% |
| 104 | 22.7 | 10% | 21.5 | 11% |
| 105 | 22.6 | 11% | 21.5 | 11% |
| 106 | 22.7 | 10% | 21.5 | 11% |
| 107 | 22.7 | 10% | 21.5 | 11% |
| 108 | 22.7 | 10% | 21.5 | 11% |
| 109 | 22.6 | 11% | 21.5 | 11% |
| 110 | 22.6 | 11% | 21.4 | 11% |
| 111 | 22.6 | 11% | 21.4 | 11% |
| 112 | 22.6 | 11% | 21.4 | 11% |
| 113 | 22.7 | 10% | 21.4 | 11% |
| 114 | 22.6 | 11% | 21.4 | 11% |
| 115 | 22.6 | 11% | 21.4 | 11% |
| 116 | 22.6 | 11% | 21.3 | 12% |
| 117 | 22.6 | 11% | 21.3 | 12% |
| 118 | 22.6 | 11% | 21.3 | 12% |
| 119 | 22.6 | 11% | 21.2 | 12% |
| 120 | 22.5 | 11% | 21.2 | 12% |
| 121 | 22.5 | 11% | 21.2 | 12% |
| 122 | 22.5 | 11% | 21.2 | 12% |
| 123 | 22.6 | 11% | 21.2 | 12% |
| 124 | 22.5 | 11% | 21.2 | 12% |
| 125 | 22.6 | 11% | 21.1 | 12% |
| 126 | 22.6 | 11% | 21.1 | 12% |
| 127 | 22.5 | 11% | 21.2 | 12% |
| 128 | 22.6 | 11% | 21.1 | 12% |
| 129 | 22.5 | 11% | 21.2 | 12% |
| 130 | 22.5 | 11% | 21.1 | 12% |
| 131 | 22.5 | 11% | 21.1 | 12% |

|     |      |     |      |     |
|-----|------|-----|------|-----|
| 132 | 22.5 | 11% | 21.1 | 12% |
| 133 | 22.5 | 11% | 21   | 13% |
| 134 | 22.5 | 11% | 21.1 | 12% |
| 135 | 22.5 | 11% | 21.1 | 12% |
| 136 | 22.5 | 11% | 21.1 | 12% |
| 137 | 22.5 | 11% | 21.1 | 12% |
| 138 | 22.5 | 11% | 21   | 13% |
| 139 | 22.4 | 11% | 21   | 13% |
| 140 | 22.4 | 11% | 21   | 13% |
| 141 | 22.4 | 11% | 21   | 13% |
| 142 | 22.5 | 11% | 21   | 13% |
| 143 | 22.4 | 11% | 21   | 13% |
| 144 | 22.5 | 11% | 21   | 13% |
| 145 | 22.4 | 11% | 21   | 13% |
| 146 | 22.4 | 11% | 21   | 13% |
| 147 | 22.4 | 11% | 21   | 13% |
| 148 | 22.4 | 11% | 20.9 | 13% |
| 149 | 22.4 | 11% | 21   | 13% |
| 150 | 22.4 | 11% | 20.9 | 13% |
| 151 | 22.5 | 11% | 21   | 13% |
| 152 | 22.4 | 11% | 21   | 13% |
| 153 | 22.4 | 11% | 20.9 | 13% |
| 154 | 22.5 | 11% | 21   | 13% |
| 155 | 22.4 | 11% | 20.9 | 13% |
| 156 | 22.4 | 11% | 20.9 | 13% |
| 157 | 22.3 | 12% | 20.9 | 13% |
| 158 | 22.3 | 12% | 21   | 13% |
| 159 | 22.4 | 11% | 20.9 | 13% |
| 160 | 22.3 | 12% | 21   | 13% |
| 161 | 22.4 | 11% | 21   | 13% |
| 162 | 22.4 | 11% | 20.9 | 13% |
| 163 | 22.4 | 11% | 20.9 | 13% |
| 164 | 22.3 | 12% | 20.9 | 13% |
| 165 | 22.2 | 12% | 20.9 | 13% |
| 166 | 22.2 | 12% | 20.8 | 14% |
| 167 | 22.2 | 12% | 20.8 | 14% |
| 168 | 22.2 | 12% | 20.9 | 13% |
| 169 | 22.2 | 12% | 20.9 | 13% |
| 170 | 22.2 | 12% | 20.8 | 14% |
| 171 | 22.2 | 12% | 20.8 | 14% |
| 172 | 22.2 | 12% | 20.8 | 14% |
| 173 | 22.2 | 12% | 20.8 | 14% |
| 174 | 22.3 | 12% | 20.8 | 14% |
| 175 | 22.2 | 12% | 20.8 | 14% |
| 176 | 22.2 | 12% | 20.8 | 14% |
| 177 | 22.1 | 13% | 20.8 | 14% |

|     |      |     |      |     |
|-----|------|-----|------|-----|
| 178 | 22.2 | 12% | 20.8 | 14% |
| 179 | 22.2 | 12% | 20.8 | 14% |
| 180 | 22.1 | 13% | 20.7 | 14% |
| 181 | 22.2 | 12% | 20.7 | 14% |
| 182 | 22.2 | 12% | 20.8 | 14% |
| 183 | 22.1 | 13% | 20.7 | 14% |
| 184 | 22.2 | 12% | 20.7 | 14% |
| 185 | 22.2 | 12% | 20.7 | 14% |
| 186 | 22.2 | 12% | 20.8 | 14% |
| 187 | 22.2 | 12% | 20.7 | 14% |
| 188 | 22.2 | 12% | 20.8 | 14% |
| 189 | 22.2 | 12% | 20.7 | 14% |
| 190 | 22.3 | 12% | 20.7 | 14% |
| 191 | 22.2 | 12% | 20.8 | 14% |
| 192 | 22.2 | 12% | 20.7 | 14% |
| 193 | 22.3 | 12% | 20.7 | 14% |
| 194 | 22.2 | 12% | 20.8 | 14% |
| 195 | 22.2 | 12% | 20.7 | 14% |
| 196 | 22.2 | 12% | 20.8 | 14% |
| 197 | 22.2 | 12% | 20.8 | 14% |
| 198 | 22.2 | 12% | 20.7 | 14% |
| 199 | 22.2 | 12% | 20.7 | 14% |
| 200 | 22.3 | 12% | 20.7 | 14% |
| 201 | 22.2 | 12% | 20.7 | 14% |
| 202 | 22.3 | 12% | 20.8 | 14% |
| 203 | 22.3 | 12% | 20.7 | 14% |
| 204 | 22.2 | 12% | 20.8 | 14% |
| 205 | 22.2 | 12% | 20.7 | 14% |
| 206 | 22.2 | 12% | 20.7 | 14% |
| 207 | 22.2 | 12% | 20.7 | 14% |
| 208 | 22.3 | 12% | 20.8 | 14% |
| 209 | 22.2 | 12% | 20.7 | 14% |
| 210 | 22.2 | 12% | 20.8 | 14% |
| 211 | 22.2 | 12% | 20.7 | 14% |
| 212 | 22.2 | 12% | 20.8 | 14% |
| 213 | 22.3 | 12% | 20.8 | 14% |
| 214 | 22.2 | 12% | 20.8 | 14% |
| 215 | 22.2 | 12% | 20.8 | 14% |
| 216 | 22.2 | 12% | 20.8 | 14% |
| 217 | 22.2 | 12% | 20.7 | 14% |
| 218 | 22.3 | 12% | 20.8 | 14% |
| 219 | 22.2 | 12% | 20.8 | 14% |
| 220 | 22.2 | 12% | 20.8 | 14% |
| 221 | 22.2 | 12% | 20.8 | 14% |
| 222 | 22.2 | 12% | 20.8 | 14% |
| 223 | 22.2 | 12% | 20.7 | 14% |

|     |      |     |      |     |
|-----|------|-----|------|-----|
| 224 | 22.2 | 12% | 20.7 | 14% |
| 225 | 22.2 | 12% | 20.7 | 14% |
| 226 | 22.2 | 12% | 20.7 | 14% |
| 227 | 22.2 | 12% | 20.7 | 14% |
| 228 | 22.1 | 13% | 20.7 | 14% |
| 229 | 22.1 | 13% | 20.8 | 14% |
| 230 | 22   | 13% | 20.8 | 14% |
| 231 | 22   | 13% | 20.7 | 14% |
| 232 | 22   | 13% | 20.7 | 14% |
| 233 | 22   | 13% | 20.7 | 14% |
| 234 | 22   | 13% | 20.8 | 14% |
| 235 | 22   | 13% | 20.7 | 14% |
| 236 | 22   | 13% | 20.7 | 14% |
| 237 | 22   | 13% | 20.6 | 15% |
| 238 | 21.9 | 13% | 20.5 | 15% |
| 239 | 22   | 13% | 20.5 | 15% |
| 240 | 21.9 | 13% | 20.5 | 15% |
| 241 | 21.9 | 13% | 20.5 | 15% |
| 242 | 22   | 13% | 20.5 | 15% |
| 243 | 21.9 | 13% | 20.5 | 15% |
| 244 | 22   | 13% | 20.5 | 15% |
| 245 | 22   | 13% | 20.5 | 15% |
| 246 | 21.9 | 13% | 20.5 | 15% |
| 247 | 22   | 13% | 20.5 | 15% |
| 248 | 22   | 13% | 20.5 | 15% |
| 249 | 22   | 13% | 20.5 | 15% |
| 250 | 21.9 | 13% | 20.5 | 15% |
| 251 | 21.9 | 13% | 20.5 | 15% |
| 252 | 22   | 13% | 20.5 | 15% |
| 253 | 21.9 | 13% | 20.5 | 15% |
| 254 | 21.9 | 13% | 20.5 | 15% |
| 255 | 21.9 | 13% | 20.4 | 15% |
| 256 | 21.9 | 13% | 20.4 | 15% |
| 257 | 21.9 | 13% | 20.4 | 15% |
| 258 | 21.9 | 13% | 20.5 | 15% |
| 259 | 21.9 | 13% | 20.4 | 15% |
| 260 | 21.9 | 13% | 20.5 | 15% |
| 261 | 21.9 | 13% | 20.4 | 15% |
| 262 | 21.9 | 13% | 20.4 | 15% |
| 263 | 21.9 | 13% | 20.4 | 15% |
| 264 | 21.8 | 14% | 20.4 | 15% |
| 265 | 21.9 | 13% | 20.4 | 15% |
| 266 | 21.8 | 14% | 20.4 | 15% |
| 267 | 21.9 | 13% | 20.4 | 15% |
| 268 | 21.8 | 14% | 20.4 | 15% |
| 269 | 21.8 | 14% | 20.4 | 15% |

|     |      |     |      |     |
|-----|------|-----|------|-----|
| 270 | 21.9 | 13% | 20.4 | 15% |
| 271 | 21.9 | 13% | 20.5 | 15% |
| 272 | 21.8 | 14% | 20.4 | 15% |
| 273 | 21.8 | 14% | 20.5 | 15% |
| 274 | 21.8 | 14% | 20.4 | 15% |
| 275 | 21.8 | 14% | 20.4 | 15% |
| 276 | 21.8 | 14% | 20.4 | 15% |
| 277 | 21.8 | 14% | 20.5 | 15% |
| 278 | 21.8 | 14% | 20.4 | 15% |
| 279 | 21.8 | 14% | 20.4 | 15% |
| 280 | 21.8 | 14% | 20.5 | 15% |
| 281 | 21.8 | 14% | 20.4 | 15% |
| 282 | 21.8 | 14% | 20.4 | 15% |
| 283 | 21.9 | 13% | 20.5 | 15% |
| 284 | 21.8 | 14% | 20.4 | 15% |
| 285 | 21.8 | 14% | 20.4 | 15% |
| 286 | 21.9 | 13% | 20.4 | 15% |
| 287 | 21.9 | 13% | 20.4 | 15% |
| 288 | 21.8 | 14% | 20.4 | 15% |
| 289 | 21.4 | 15% | 20.4 | 15% |
| 290 | 21.3 | 16% | 20.4 | 15% |
| 291 | 21.4 | 15% | 20.4 | 15% |
| 292 | 21.5 | 15% | 20.5 | 15% |
| 293 | 21.4 | 15% | 20.4 | 15% |
| 294 | 21.4 | 15% | 20.4 | 15% |
| 295 | 21.4 | 15% | 20.5 | 15% |
| 296 | 21.4 | 15% | 20.4 | 15% |
| 297 | 21.3 | 16% | 20.4 | 15% |
| 298 | 21.3 | 16% | 20.4 | 15% |
| 299 | 21.4 | 15% | 20.4 | 15% |
| 300 | 21.4 | 15% | 20.4 | 15% |
| 301 | 21.3 | 16% | 20.3 | 16% |
| 302 | 21.3 | 16% | 20.3 | 16% |
| 303 | 21.3 | 16% | 20.3 | 16% |
| 304 | 21.4 | 15% | 20.3 | 16% |
| 305 | 21.4 | 15% | 20.3 | 16% |
| 306 | 21.4 | 15% | 20.3 | 16% |
| 307 | 21.4 | 15% | 20.3 | 16% |
| 308 | 21.4 | 15% | 20.3 | 16% |
| 309 | 21.4 | 15% | 20.2 | 16% |
| 310 | 21.4 | 15% | 20.2 | 16% |
| 311 | 21.4 | 15% | 20.3 | 16% |
| 312 | 21.4 | 15% | 20.2 | 16% |
| 313 | 21.4 | 15% | 20.2 | 16% |
| 314 | 21.3 | 16% | 20.3 | 16% |
| 315 | 21.3 | 16% | 20.3 | 16% |

|     |      |     |      |     |
|-----|------|-----|------|-----|
| 316 | 21.3 | 16% | 20.3 | 16% |
| 317 | 21.3 | 16% | 20.3 | 16% |
| 318 | 21.4 | 15% | 20.3 | 16% |
| 319 | 21.4 | 15% | 20.3 | 16% |
| 320 | 21.3 | 16% | 20.3 | 16% |
| 321 | 21.4 | 15% | 20.3 | 16% |
| 322 | 21.3 | 16% | 20.3 | 16% |
| 323 | 21.4 | 15% | 20.3 | 16% |
| 324 | 21.3 | 16% | 20.3 | 16% |
| 325 | 21.3 | 16% | 20.3 | 16% |

**Supplementary Table 13.** Gas consumption experiment for **L1** and **L6**

## SI-H: DFT and experimental IR spectra

### a) Computational details

In our calculation, geometry optimization was carried out using the M06L<sup>[1]</sup> functional with all electron TZVP<sup>[2]</sup> basis set in gas phase as well as in the solution of THF and toluene based on solute electron density (SMD<sup>[3]</sup>). All optimized structures were further characterized either as energy minimums without imaginary frequencies at the corresponding level, which provided zero-point vibrational energies and thermodynamic corrections to enthalpy and Gibbs free energy at 298.15 K under 1 atmosphere. We used the M06L/TZVP computed Gibbs free energies for comparison and discussion. All calculations were carried out using Gaussian 16 program.<sup>[4]</sup>

**Supplementary Table 14.** M06L/TZVP computed total electronic energies (HF, au), zero-point vibrational energies (ZPE, au), sum of electronic and thermal enthalpies (Htot, au), sum of electronic and thermal free energies (Gtot, au), number of Imaginary frequencies (NImag) in gas phase as well as in the solution of THF and toluene.

|                                                                                     | M06L/TZVP<br>gas phase                                                                   | M06L-SCRF/TZVP<br>THF                                                                    | M06L-SCRF/TZVP<br>toluene                                                                |
|-------------------------------------------------------------------------------------|------------------------------------------------------------------------------------------|------------------------------------------------------------------------------------------|------------------------------------------------------------------------------------------|
| 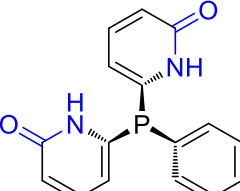 | HF=-1219.0098437<br>ZPE= 0.258939<br>NImag=0<br>Htot= -1218.732156<br>Gtot= -1218.799132 | HF=-1219.0383712<br>ZPE= 0.258935<br>NImag=0<br>Htot= -1218.760770<br>Gtot= -1218.827400 | HF=-1219.0334687<br>ZPE= 0.259066<br>NImag=0<br>Htot= -1218.755706<br>Gtot= -1218.822559 |

<sup>[1]</sup> Zhao, Y.; Truhlar, D. G. *J. Chem. Phys.*, **125** (2006), 194101: 1-18

<sup>[2]</sup> Schäfer, A., Huber, C., Ahlrichs, R. Fully optimized contracted Gaussian basis sets of triple zeta valence quality for atoms Li to Kr. *J. Chem. Phys.* **100**, 5829-5835

<sup>[3]</sup> Marenich, A. V., Cramer, C. J., Truhlar, D. G. Universal Solvation Model Based on Solute Electron Density and on a Continuum Model of the Solvent Defined by the Bulk Dielectric Constant and Atomic Surface Tensions. *J. Phys. Chem. B* **113**, 6378-6396, doi:10.1021/jp810292n (2009)

<sup>[4]</sup> Frisch, M. J. et al. Gaussian 16, Revision A.03. Gaussian Inc. Gaussian, Inc., Wallingford CT, 2016

|                                                                                     |                                                                                          |                                                                                          |                                                                                          |
|-------------------------------------------------------------------------------------|------------------------------------------------------------------------------------------|------------------------------------------------------------------------------------------|------------------------------------------------------------------------------------------|
| <b>L-a</b>                                                                          |                                                                                          |                                                                                          |                                                                                          |
| 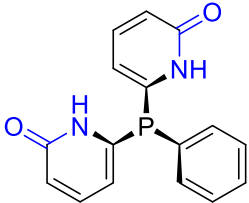   | HF=-1219.0088966<br>ZPE= 0.258920<br>NImag=0<br>Htot= -1218.731107<br>Gtot= -1218.798952 | HF=-1219.0385151<br>ZPE= 0.259030<br>NImag=0<br>Htot= -1218.760762<br>Gtot= -1218.827572 | HF=-1219.0331181<br>ZPE= 0.259136<br>NImag=0<br>Htot= -1218.755213<br>Gtot= -1218.822400 |
| <b>L-a1</b>                                                                         |                                                                                          |                                                                                          |                                                                                          |
| 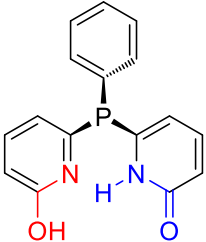   | HF=-1219.0125129<br>ZPE= 0.259094<br>NImag=0<br>Htot= -1218.734830<br>Gtot= -1218.800966 | HF=-1219.0348591<br>ZPE= 0.258553<br>NImag=0<br>Htot= -1218.757675<br>Gtot= -1218.824229 | HF=-1219.0325556<br>ZPE= 0.258893<br>NImag=0<br>Htot= -1218.755036<br>Gtot= -1218.821567 |
| <b>L-b</b>                                                                          |                                                                                          |                                                                                          |                                                                                          |
| 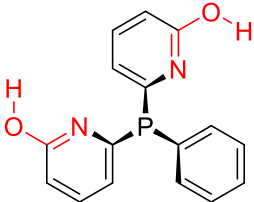  | HF=-1219.0027536<br>ZPE= 0.258743<br>NImag=0<br>Htot= -1218.725313<br>Gtot= -1218.792855 | HF=-1219.0226262<br>ZPE= 0.258149<br>NImag=0<br>Htot= -1218.745742<br>Gtot= -1218.812676 | HF=-1219.0207315<br>ZPE= 0.258481<br>NImag=0<br>Htot= -1218.743520<br>Gtot= -1218.811180 |
| <b>L-b1</b>                                                                         |                                                                                          |                                                                                          |                                                                                          |
| 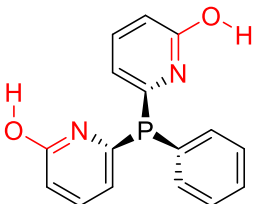 | HF=-1219.0027534<br>ZPE= 0.258743<br>NImag=0<br>Htot= -1218.725313<br>Gtot= -1218.792863 | HF=-1219.0226262<br>ZPE= 0.258149<br>NImag=0<br>Htot= -1218.745742<br>Gtot= -1218.812676 | HF=-1219.0207315<br>ZPE= 0.258481<br>NImag=0<br>Htot= -1218.743520<br>Gtot= -1218.811180 |
| <b>L-b2</b>                                                                         |                                                                                          |                                                                                          |                                                                                          |
| 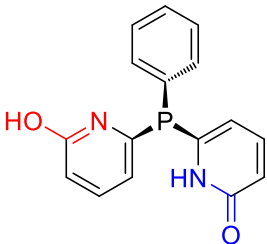 | HF=-1219.0066152<br>ZPE= 0.258805<br>NImag=0<br>Htot= -1218.729021<br>Gtot= -1218.797023 | HF=-1219.0310499<br>ZPE= 0.258475<br>NImag=0<br>Htot= -1218.753814<br>Gtot= -1218.821074 | HF=-1219.0276058<br>ZPE= 0.258725<br>NImag=0<br>Htot= -1218.750109<br>Gtot= -1218.817563 |
| <b>L-b3</b>                                                                         |                                                                                          |                                                                                          |                                                                                          |

|                                                                                                     |                                                                                       |                                                                                        |                                                                                        |
|-----------------------------------------------------------------------------------------------------|---------------------------------------------------------------------------------------|----------------------------------------------------------------------------------------|----------------------------------------------------------------------------------------|
| 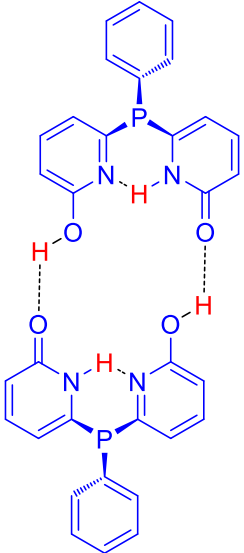 <p><b>L6D</b></p> | HF=-2438.059633<br>ZPE=0.520308<br>NImag=0<br>Htot=-2437.501994<br>Gtot= -2437.613112 | HF=-2438.0935405<br>ZPE=0.519303<br>NImag=0<br>Htot=-2437.536832<br>Gtot= -2437.647851 | HF=-2438.0922235<br>ZPE=0.519860<br>NImag=0<br>Htot=-2437.534959<br>Gtot= -2437.646144 |
|-----------------------------------------------------------------------------------------------------|---------------------------------------------------------------------------------------|----------------------------------------------------------------------------------------|----------------------------------------------------------------------------------------|

**Supplementary Table 15.** M06L/TZVP optimized Cartesian Coordinates in gas phase.

|                                                                                                      | M06L/TZVP gas phase                                                                                                                                                                                                                                                                                                                                                                                                                                                                                                                                                                                                                                                                                                                                                                                                                                                                                                                                                                                                                                                                                                                                                                                                                                                                                                                                                                                                                                                                                                                                                                                                                                              |
|------------------------------------------------------------------------------------------------------|------------------------------------------------------------------------------------------------------------------------------------------------------------------------------------------------------------------------------------------------------------------------------------------------------------------------------------------------------------------------------------------------------------------------------------------------------------------------------------------------------------------------------------------------------------------------------------------------------------------------------------------------------------------------------------------------------------------------------------------------------------------------------------------------------------------------------------------------------------------------------------------------------------------------------------------------------------------------------------------------------------------------------------------------------------------------------------------------------------------------------------------------------------------------------------------------------------------------------------------------------------------------------------------------------------------------------------------------------------------------------------------------------------------------------------------------------------------------------------------------------------------------------------------------------------------------------------------------------------------------------------------------------------------|
| 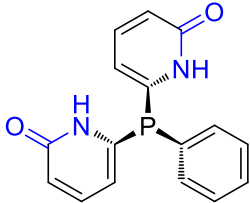 <p><b>L-a</b></p> | P,0,-1.4998236555,-0.0090968569,-0.0364906546<br>C,0,-0.656695519,-1.2620956111,1.0360675978<br>C,0,-0.7496115108,1.5546763448,0.5770810162<br>C,0,-0.5570689886,-0.2755419315,-1.6066894467<br>C,0,0.3604937439,-3.3400808231,2.5916464873<br>C,0,0.2762110295,4.0238354804,1.3726591256<br>C,0,0.8851227174,-0.712348675,-3.9508397406<br>N,0,-0.1626346545,-2.3943904721,0.4720434692<br>C,0,0.5357454365,1.6470463748,1.1190694435<br>N,0,0.5614334751,0.4405484022,-1.892361842<br>C,0,-0.6582604161,-1.1498779211,2.3986127489<br>C,0,-1.511766743,2.7159905542,0.4437788373<br>C,0,-0.9801746998,-1.2240200502,-2.4964587924<br>C,0,-0.1292378204,-2.2099006135,3.167693738<br>C,0,-1.0005765606,3.9432657638,0.8380990972<br>C,0,-0.2244119264,-1.4438183057,-3.6737309222<br>C,0,0.3728040504,-3.5114374675,1.1628578922<br>C,0,1.0430399939,2.8753295002,1.5132799014<br>C,0,1.3564427706,0.3188296208,-3.059135441<br>H,0,-1.0549548968,-0.2616214894,2.8687213139<br>H,0,-2.5128074213,2.6537264899,0.0323781924<br>H,0,-1.8890311847,-1.7763443039,-2.3018414791<br>H,0,-0.1215229584,-2.1153294221,4.2478173015<br>H,0,-1.6026250662,4.8366006709,0.730674619<br>H,0,-0.5506456701,-2.2081372878,-4.3695105622<br>H,0,0.7615771436,-4.1537582963,3.1787947543<br>H,0,0.674899477,4.9816564621,1.6820914297<br>H,0,1.4609894277,-0.8675785948,-4.8520792805<br>H,0,2.0410828761,2.9350783648,1.9285773901<br>O,0,2.3221740361,1.0443099768,-3.2096304029<br>O,0,0.7826528047,-4.4679696459,0.5291065408<br>H,0,1.135327025,0.7521689019,1.2425203063<br>H,0,0.8743165258,1.1534856442,-1.2431565305<br>H,0,-0.139939241,-2.4784286838,-0.5389731081 |

|                                                                                                       |                                                                                                                                                                                                                                                                                                                                                                                                                                                                                                                                                                                                                                                                                                                                                                                                                                                                                                                                                                                                                                                                                                                                                                                                                                                                                                                                                                                                                                                                                                                                                                                                                                                                                                                                       |
|-------------------------------------------------------------------------------------------------------|---------------------------------------------------------------------------------------------------------------------------------------------------------------------------------------------------------------------------------------------------------------------------------------------------------------------------------------------------------------------------------------------------------------------------------------------------------------------------------------------------------------------------------------------------------------------------------------------------------------------------------------------------------------------------------------------------------------------------------------------------------------------------------------------------------------------------------------------------------------------------------------------------------------------------------------------------------------------------------------------------------------------------------------------------------------------------------------------------------------------------------------------------------------------------------------------------------------------------------------------------------------------------------------------------------------------------------------------------------------------------------------------------------------------------------------------------------------------------------------------------------------------------------------------------------------------------------------------------------------------------------------------------------------------------------------------------------------------------------------|
| 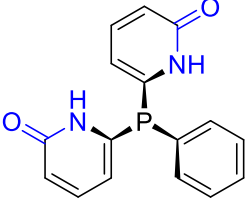 <p><b>L-a1</b></p>  | <p>P,0,1.0734432089,0.0047987098,0.0921679136<br/> C,0,0.1563817949,0.7532790365,1.5040905469<br/> C,0,0.2666834221,-1.6413327629,-0.0423747894<br/> C,0,0.2621785368,0.8940148834,-1.3093654239<br/> C,0,-0.9753845816,2.0751248764,3.6833627946<br/> C,0,-0.8619663886,-4.1845250014,-0.1546429505<br/> C,0,-0.7191590117,2.1013153696,-3.6251757229<br/> C,0,-0.7993926358,0.128041634,2.24973567<br/> C,0,-0.9825606477,-1.8317343681,-0.633786419<br/> C,0,-0.7335608238,1.8227231368,-1.2165326598<br/> N,0,0.543949722,2.0145767707,1.8557873413<br/> C,0,0.9471103074,-2.7392075062,0.4839991468<br/> N,0,0.7562305106,0.5837511209,-2.5429451078<br/> C,0,0.0304956116,2.7807207011,2.9293791542<br/> C,0,0.3805547021,-4.0039071548,0.434850791<br/> C,0,0.3268065305,1.1216153593,-3.77965782<br/> C,0,-1.359903104,0.8153745955,3.3530237263<br/> C,0,-1.5406830035,-3.0987972695,-0.6909661388<br/> C,0,-1.2134549542,2.4277300206,-2.4033313277<br/> H,0,-1.1185185145,-0.8706906561,1.9936719403<br/> H,0,-1.5188132405,-0.9838292729,-1.0454702062<br/> H,0,-1.1534788111,2.0784584046,-0.2554240323<br/> H,0,1.26203105,2.4878938054,1.321934659<br/> H,0,1.9240283019,-2.6000920974,0.9331342852<br/> H,0,1.5032557919,-0.0937630995,-2.6296978879<br/> O,0,0.4529603288,3.9059872425,3.1261747335<br/> H,0,0.9144920928,-4.8497527168,0.8491206508<br/> O,0,0.8450325393,0.7446166536,-4.8153176348<br/> H,0,-2.1193300605,0.3167671817,3.9448687133<br/> H,0,-2.5090533458,-3.2388921091,-1.1547641562<br/> H,0,-2.001327427,3.1685148174,-2.3263790313<br/> H,0,-1.4008411063,2.6008874367,4.5263172172<br/> H,0,-1.3001409338,-5.1735402118,-0.2017806107<br/> H,0,-1.0836163611,2.5630808699,-4.5317384648</p> |
| 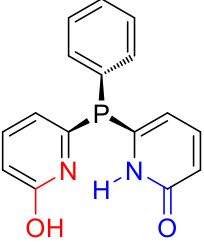 <p><b>L-b</b></p> | <p>P,0,1.3797121937,-0.0878288695,0.0257987431<br/> C,0,0.5178679979,0.5370308392,-1.4931345464<br/> C,0,0.7232222402,1.0407254328,1.3184745504<br/> C,0,0.4278815858,-1.6303263998,0.3890894746<br/> C,0,0.1470917002,1.8660735069,-1.6378648348<br/> H,0,0.2449373966,2.5585250515,-0.8133468139<br/> C,0,-0.3599672463,2.2786002668,-2.8659341859<br/> H,0,-0.6567650648,3.3103834656,-3.0091891844<br/> C,0,-0.4928931928,1.3777416093,-3.899502801<br/> H,0,-0.8859374039,1.6540262268,-4.8671093089<br/> C,0,1.6353886206,1.7828358726,2.0656446803<br/> H,0,2.6967930495,1.6672094043,1.8782493056<br/> C,0,-0.6429680393,1.1928335072,1.5695899656<br/> H,0,-1.3610586665,0.6166702366,0.9972012116<br/> C,0,-1.0812400574,2.0703831345,2.5462163261<br/> C,0,1.194430917,2.6634133037,3.0448345958<br/> H,0,1.9125072448,3.2341571624,3.6201510526<br/> C,0,-0.1624888113,2.8071286669,3.2848199378<br/> H,0,-0.5082740395,3.4920580605,4.0490587745<br/> H,0,-2.1420314197,2.1810213186,2.7342070732<br/> N,0,0.1597122782,-2.4610774656,-0.6491158462<br/> H,0,0.3180710583,-2.101898424,-1.589431848<br/> C,0,-0.4464092316,-3.7314789733,-0.5695439863</p>                                                                                                                                                                                                                                                                                                                                                                                                                                                                                                                                                               |

|                                                                                                        |                                                                                                                                                                                                                                                                                                                                                                                                                                                                                                                                                                                                                                                                                                                                                                                                                                                                                                                                                                                                                                                                                                                                                                                                                                                                                                                                                                                                                                                                                                                                                                                                                                                                                                                                                |
|--------------------------------------------------------------------------------------------------------|------------------------------------------------------------------------------------------------------------------------------------------------------------------------------------------------------------------------------------------------------------------------------------------------------------------------------------------------------------------------------------------------------------------------------------------------------------------------------------------------------------------------------------------------------------------------------------------------------------------------------------------------------------------------------------------------------------------------------------------------------------------------------------------------------------------------------------------------------------------------------------------------------------------------------------------------------------------------------------------------------------------------------------------------------------------------------------------------------------------------------------------------------------------------------------------------------------------------------------------------------------------------------------------------------------------------------------------------------------------------------------------------------------------------------------------------------------------------------------------------------------------------------------------------------------------------------------------------------------------------------------------------------------------------------------------------------------------------------------------------|
|                                                                                                        | <p>O,0,-0.6781443565,-4.3515677825,-1.5977344847<br/> C,0,0.1390206923,-2.0439853295,1.6617260295<br/> H,0,0.3526610006,-1.4050542925,2.5056733417<br/> C,0,-0.4430114523,-3.318482704,1.835770463<br/> H,0,-0.6731925972,-3.6506799665,2.8422487649<br/> C,0,-0.7221120734,-4.1355016919,0.783146616<br/> H,0,-1.1696216387,-5.1097453394,0.9195653083<br/> N,0,0.4111461129,-0.3461205858,-2.5020509812<br/> C,0,-0.0995728696,0.0621636449,-3.655467787<br/> O,0,-0.2371469462,-0.8432476349,-4.6366650998<br/> H,0,0.0572264183,-1.695318152,-4.2848195064</p>                                                                                                                                                                                                                                                                                                                                                                                                                                                                                                                                                                                                                                                                                                                                                                                                                                                                                                                                                                                                                                                                                                                                                                             |
| 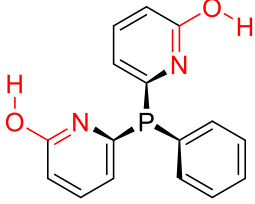 <p><b>L-b1</b></p>   | <p>P,0,-0.0769049993,1.0829638443,0.1332712978<br/> C,0,-0.6776437053,0.1236983311,1.5971731291<br/> C,0,-1.0340137878,0.3138388168,-1.2535650848<br/> C,0,1.5714960724,0.309477536,-0.1440954288<br/> C,0,-1.7304378684,-1.031630937,3.8524764825<br/> C,0,-2.2874203089,-0.6088552748,-3.5089443909<br/> C,0,4.1240256732,-0.7855874767,-0.4305558776<br/> C,0,0.1190132846,-0.7257455534,2.3532626207<br/> C,0,-2.1976533593,-0.427908015,-1.1157811417<br/> C,0,1.7417156273,-0.9538459057,-0.7124278197<br/> N,0,-1.946628748,0.4063476276,1.9430765159<br/> N,0,-0.509475042,0.6085268159,-2.4541555799<br/> C,0,2.6984386466,1.0159089664,0.2717764971<br/> C,0,-2.4461207901,-0.1660670825,3.025946669<br/> C,0,-1.1188609447,0.1521926403,-3.5349513679<br/> C,0,3.9674199681,0.4700550203,0.1353783266<br/> C,0,-0.4283273605,-1.3047227053,3.4941435694<br/> C,0,-2.8211896828,-0.8916534111,-2.2703636164<br/> C,0,3.0084796473,-1.4954500692,-0.8565488553<br/> H,0,1.1372868722,-0.935812729,2.057632583<br/> H,0,-2.6057967376,-0.6331219776,-0.1373872414<br/> H,0,0.8750142556,-1.5166448956,-1.0405426485<br/> O,0,-3.7251046485,0.1222369349,3.3393542518<br/> O,0,-0.5652300756,0.4532086261,-4.7263547615<br/> H,0,4.8338355982,1.0303823769,0.4645734841<br/> H,0,0.1699463093,-1.9718744472,4.102941213<br/> H,0,-3.7280882218,-1.4797475932,-2.1960556828<br/> H,0,3.1271956067,-2.4765821789,-1.3001386434<br/> H,0,-2.1955071228,-1.4561500007,4.7306901145<br/> H,0,-2.7379058311,-0.9493155583,-4.4303072615<br/> H,0,5.1135176455,-1.2109171473,-0.5442673287<br/> H,0,-4.0217402724,0.7516323867,2.6667693062<br/> H,0,0.2201747246,0.9797731853,-4.5203394851<br/> H,0,2.5780848754,2.00310495,0.7040333552</p> |
| 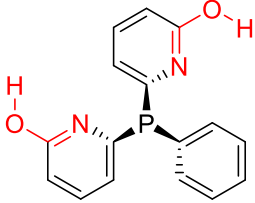 <p><b>L-b2</b></p> | <p>P,0,0.283971468,1.3789682455,-0.1516510684<br/> C,0,-1.3905073742,0.8410118548,-0.7267930484<br/> C,0,0.3264489005,0.653553195,1.5408104936<br/> C,0,1.3977447596,0.1954238736,-1.040310603<br/> C,0,-3.8783447503,0.3136631498,-1.7573560919<br/> C,0,0.2846799396,-0.3308547895,4.1534383888<br/> C,0,3.3014074239,-1.3979359557,-2.2006405587<br/> N,0,-1.638953653,1.1376462507,-2.0152745235<br/> C,0,0.5125682436,-0.7071771804,1.7892050081<br/> N,0,2.6313199373,0.167177001,-0.5103576813<br/> C,0,-2.358396505,0.2868882326,0.1002460502<br/> C,0,0.1255670042,1.5117028637,2.6202745332</p>                                                                                                                                                                                                                                                                                                                                                                                                                                                                                                                                                                                                                                                                                                                                                                                                                                                                                                                                                                                                                                                                                                                                      |

|                                                                                                       |                                                                                                                                                                                                                                                                                                                                                                                                                                                                                                                                                                                                                                                                                                                                                                                                                                                                                                                                                                                                                                                                                                                                                                                                                                                                                                                                                                                                                                                                                                                                                                                                                                                                |
|-------------------------------------------------------------------------------------------------------|----------------------------------------------------------------------------------------------------------------------------------------------------------------------------------------------------------------------------------------------------------------------------------------------------------------------------------------------------------------------------------------------------------------------------------------------------------------------------------------------------------------------------------------------------------------------------------------------------------------------------------------------------------------------------------------------------------------------------------------------------------------------------------------------------------------------------------------------------------------------------------------------------------------------------------------------------------------------------------------------------------------------------------------------------------------------------------------------------------------------------------------------------------------------------------------------------------------------------------------------------------------------------------------------------------------------------------------------------------------------------------------------------------------------------------------------------------------------------------------------------------------------------------------------------------------------------------------------------------------------------------------------------------------|
|                                                                                                       | C,O,1.0578472475,-0.5416558721,-2.164776714<br>C,O,-3.6153401329,0.0245254238,-0.4361122756<br>C,O,0.0986281221,1.0226326423,3.9190902913<br>C,O,2.0347788565,-1.3480679335,-2.7411513129<br>C,O,-2.8385041357,0.8678344111,-2.5031433345<br>C,O,0.4942560487,-1.1945028739,3.0857409444<br>C,O,3.5395828613,-0.6104448468,-1.0743604558<br>H,O,-2.1369255547,0.0597425173,1.1335734364<br>H,O,-0.008569958,2.5723809486,2.4390104541<br>H,O,0.0624323168,-0.4840848526,-2.5792479249<br>H,O,-4.38981362,-0.4079873603,0.1858039152<br>H,O,-0.0600247663,1.7015252437,4.7479121493<br>H,O,1.7987697894,-1.9414751438,-3.6163707639<br>H,O,-4.8397858282,0.1295026413,-2.2150482814<br>H,O,0.2708333469,-0.7139863267,5.1663299882<br>H,O,4.0892861841,-2.0104383039,-2.6151861864<br>H,O,0.64099507,-2.2526818506,3.2652126663<br>O,O,4.766093062,-0.628333217,-0.5158720984<br>O,O,-3.0541937167,1.1601030875,-3.801295736<br>H,O,4.7161262442,-0.0213001443,0.2361833529<br>H,O,-2.2299940396,1.5554999446,-4.1188783276<br>H,O,0.6694747081,-1.3881862758,0.9602406147                                                                                                                                                                                                                                                                                                                                                                                                                                                                                                                                                                                      |
| 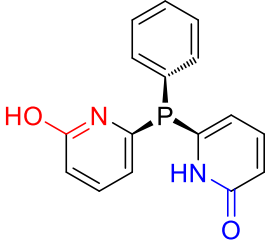 <p><b>L-b3</b></p> | P,O,1.3265893962,-0.1920703921,0.0505100088<br>C,O,0.547116639,0.493733924,-1.478461218<br>C,O,0.7486888259,0.9958361389,1.3370333068<br>C,O,0.1859917836,-1.6005673535,0.4062885629<br>C,O,-0.1254144749,1.7046243569,-1.5335398661<br>H,O,-0.2848763987,2.2912181442,-0.6397702209<br>C,O,-0.5960295344,2.13773585,-2.7707670859<br>H,O,-1.1257850723,3.0792201467,-2.8495586879<br>C,O,-0.3902334166,1.3698721949,-3.8950001119<br>H,O,-0.7361813283,1.6670399983,-4.8746992439<br>C,O,1.6572555678,1.9554063788,1.7836558825<br>H,O,2.6681401413,1.9570559139,1.391003994<br>C,O,-0.5444213181,0.9928453477,1.8631770352<br>H,O,-1.2612993827,0.2528295239,1.5239258282<br>C,O,-0.917620933,1.9316221829,2.8116014477<br>C,O,1.2784635862,2.9021798014,2.7241881478<br>H,O,1.9924172597,3.6435588658,3.0606606053<br>C,O,-0.0084130113,2.8893626935,3.2407520884<br>H,O,-0.3023326173,3.6212245227,3.9827423211<br>H,O,-1.9219364936,1.9168376013,3.2165619868<br>N,O,0.4394827935,-2.2505369784,1.5795509788<br>H,O,1.1893819228,-1.9288965346,2.1786591278<br>C,O,-0.2596189231,-3.3671171884,2.0934756998<br>O,O,0.0664837296,-3.8428102604,3.16798603<br>C,O,-0.8287889481,-2.056594198,-0.3842956944<br>H,O,-1.0478729081,-1.5678580939,-1.3203724192<br>C,O,-1.5748657527,-3.1786992972,0.0450670544<br>H,O,-2.3800972445,-3.5388144164,-0.5859207597<br>C,O,-1.3157269049,-3.8096062935,1.2204765729<br>H,O,-1.8859631303,-4.6670296854,1.5484930732<br>N,O,0.7672028638,-0.2608001232,-2.5676660144<br>C,O,0.2984769001,0.1670638911,-3.7284669451<br>O,O,0.5139509681,-0.6105336808,-4.8053489363<br>H,O,1.0124177155,-1.3747896812,-4.4827106488 |

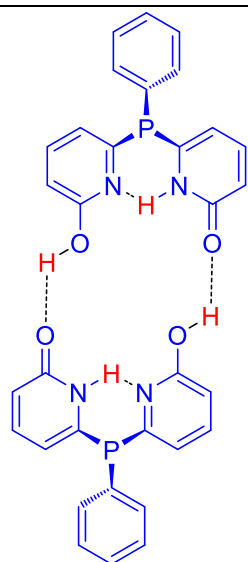

**L6D**

P,0,5.224376534,-0.1482336539,0.2776108794  
 P,0,-5.224376534,0.1482336539,-0.2776108794  
 C,0,3.9175720012,0.2780387115,-0.9605469744  
 C,0,-3.9175720012,-0.2780387115,0.9605469744  
 C,0,6.4323310111,1.2228181959,0.0670645532  
 C,0,-6.4323310111,-1.2228181959,-0.0670645532  
 C,0,4.4220382348,0.3699959836,1.8614674037  
 C,0,-4.4220382348,-0.3699959836,-1.8614674037  
 C,0,4.1986092007,0.9679827406,-2.1287323411  
 C,0,-4.1986092007,-0.9679827406,2.1287323411  
 H,0,5.1761331043,1.3960440727,-2.3027567858  
 H,0,-5.1761331043,-1.3960440727,2.3027567858  
 C,0,3.1731132338,1.0934739074,-3.062427178  
 C,0,-3.1731132338,-1.0934739074,3.062427178  
 H,0,3.3472605192,1.6283354043,-3.9886967078  
 H,0,-3.3472605192,-1.6283354043,3.9886967078  
 C,0,1.939934051,0.5358357984,-2.8169694356  
 C,0,-1.939934051,-0.5358357984,2.8169694356  
 H,0,1.1232249079,0.6048018909,-3.5229354855  
 H,0,-1.1232249079,-0.6048018909,3.5229354855  
 C,0,7.7515515001,0.8960883615,-0.2387948746  
 C,0,-7.7515515001,-0.8960883615,0.2387948746  
 H,0,8.0349328751,-0.1464063225,-0.3287366213  
 H,0,-8.0349328751,0.1464063225,0.3287366213  
 C,0,6.0764137883,2.5690764933,0.1819709096  
 C,0,-6.0764137883,-2.5690764933,-0.1819709096  
 H,0,5.0519979044,2.8350366436,0.4171737107  
 H,0,-5.0519979044,-2.8350366436,-0.4171737107  
 C,0,7.0225529202,3.5619380141,-0.0045795665  
 C,0,-7.0225529202,-3.5619380141,0.0045795665  
 C,0,8.7001050821,1.8930379046,-0.4273121416  
 C,0,-8.7001050821,-1.8930379046,0.4273121416  
 H,0,9.7226646357,1.6270620316,-0.6643460852  
 H,0,-9.7226646357,-1.6270620316,0.6643460852  
 C,0,8.3362377627,3.224627636,-0.3095311217  
 C,0,-8.3362377627,-3.224627636,0.3095311217  
 H,0,9.0746768875,4.003392158,-0.4547955792  
 H,0,-9.0746768875,-4.003392158,0.4547955792  
 H,0,6.7366587052,4.602581511,0.0863753923  
 H,0,-6.7366587052,-4.602581511,-0.0863753923  
 N,0,3.0917885402,0.1530947908,2.0269177542  
 N,0,-3.0917885402,-0.1530947908,-2.0269177542  
 H,0,2.5724484392,-0.169169887,1.1969658828  
 H,0,-2.5724484392,0.169169887,-1.1969658828  
 C,0,2.3755083712,0.3994570933,3.1950623544  
 C,0,-2.3755083712,-0.3994570933,-3.1950623544  
 O,0,1.1463615144,0.2264293116,3.2179257313  
 O,0,-1.1463615144,-0.2264293116,-3.2179257313  
 C,0,5.1589263833,0.8293845538,2.9239458777  
 C,0,-5.1589263833,-0.8293845538,-2.9239458777  
 H,0,6.2181676873,1.007830485,2.8090404531  
 H,0,-6.2181676873,-1.007830485,-2.8090404531  
 C,0,4.5080444625,1.0608732138,4.146660166  
 C,0,-4.5080444625,-1.0608732138,-4.146660166  
 H,0,5.0865589802,1.4201170341,4.9903421958  
 H,0,-5.0865589802,-1.4201170341,-4.9903421958  
 C,0,3.1677744791,0.8485268794,4.2926858293

|  |                                                                                                                                                                                                                                                                                                                                                                                                                                                                                                                                          |
|--|------------------------------------------------------------------------------------------------------------------------------------------------------------------------------------------------------------------------------------------------------------------------------------------------------------------------------------------------------------------------------------------------------------------------------------------------------------------------------------------------------------------------------------------|
|  | C,O,-3.1677744791,-0.8485268794,-4.2926858293<br>H,O,2.6546361934,1.0299241292,5.2259113999<br>H,O,-2.6546361934,-1.0299241292,-5.2259113999<br>N,O,2.7232097525,-0.2728202108,-0.7007325991<br>N,O,-2.7232097525,0.2728202108,0.7007325991<br>C,O,1.7492545628,-0.1482754179,-1.6047275171<br>C,O,-1.7492545628,0.1482754179,1.6047275171<br>O,O,0.6055693476,-0.7310757371,-1.2837755681<br>O,O,-0.6055693476,0.7310757371,1.2837755681<br>H,O,-0.0749999648,-0.5298987647,-1.9769267977<br>H,O,0.0749999648,0.5298987647,1.9769267977 |
|--|------------------------------------------------------------------------------------------------------------------------------------------------------------------------------------------------------------------------------------------------------------------------------------------------------------------------------------------------------------------------------------------------------------------------------------------------------------------------------------------------------------------------------------------|

**Supplementary Table 16.** M06L/TZVP optimized Cartesian Coordinates in THF

|                                                                                               | M06L-SCRF/TZVP in THF                                                                                                                                                                                                                                                                                                                                                                                                                                                                                                                                                                                                                                                                                                                                                                                                                                                                                                                                                                                                                                                                                                                                                                                                                                                                                                                                                                                                                                                                                                                                                                                   |
|-----------------------------------------------------------------------------------------------|---------------------------------------------------------------------------------------------------------------------------------------------------------------------------------------------------------------------------------------------------------------------------------------------------------------------------------------------------------------------------------------------------------------------------------------------------------------------------------------------------------------------------------------------------------------------------------------------------------------------------------------------------------------------------------------------------------------------------------------------------------------------------------------------------------------------------------------------------------------------------------------------------------------------------------------------------------------------------------------------------------------------------------------------------------------------------------------------------------------------------------------------------------------------------------------------------------------------------------------------------------------------------------------------------------------------------------------------------------------------------------------------------------------------------------------------------------------------------------------------------------------------------------------------------------------------------------------------------------|
| 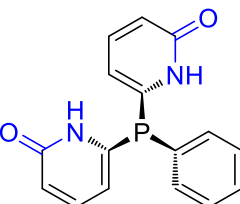 <p>L-a</p> | P,O,-1.4895014681,0.0010882126,-0.0509617867<br>C,O,-0.6701158054,-1.2577128386,1.032702597<br>C,O,-0.7305021166,1.5572365335,0.5673936671<br>C,O,-0.5568942447,-0.2862969026,-1.6228462669<br>C,O,0.3617133277,-3.3099967509,2.6033103994<br>C,O,0.2965525089,4.0087965737,1.4077696966<br>C,O,0.8586627663,-0.7236680826,-3.9762788079<br>N,O,-0.1071606324,-2.3621030718,0.4784532828<br>C,O,0.554047815,1.6358500493,1.1135033331<br>N,O,0.553347214,0.4369580523,-1.9259788328<br>C,O,-0.7363097108,-1.1623654507,2.396096686<br>C,O,-1.4920273623,2.72098575,0.4501474831<br>C,O,-0.9837787294,-1.2447611129,-2.5001427953<br>C,O,-0.1994992262,-2.2073392891,3.1741626372<br>C,O,-0.9789615209,3.9404168476,0.8670104485<br>C,O,-0.2428464274,-1.4649204785,-3.683217121<br>C,O,0.4390256199,-3.4556245884,1.1785837707<br>C,O,1.0619212854,2.8566227851,1.5302941201<br>C,O,1.3278082465,0.3101043366,-3.0934384515<br>H,O,-1.187121741,-0.2953264098,2.8576706922<br>H,O,-2.4924112496,2.6689746209,0.035448131<br>H,O,-1.879402021,-1.811410582,-2.2856627213<br>H,O,-0.2410035046,-2.1283814194,4.2547198541<br>H,O,-1.579585055,4.8366784633,0.7742075052<br>H,O,-0.5713802524,-2.2341610633,-4.3724908184<br>H,O,0.7695577722,-4.1134567499,3.2011237934<br>H,O,0.6951740273,4.9603131614,1.737361996<br>H,O,1.4214981711,-0.8798513953,-4.88637858<br>H,O,2.0586914352,2.907335175,1.9506312147<br>O,O,2.2951349643,1.0434968345,-3.2654336638<br>O,O,0.9179523823,-4.3964768138,0.5524288758<br>H,O,1.1560804599,0.7398293438,1.2165590298<br>H,O,0.8650311946,1.1557228036,-1.280846648 |

|                                                                                            |                                                                                                                                                                                                                                                                                                                                                                                                                                                                                                                                                                                                                                                                                                                                                                                                                                                                                                                                                                                                                                                                                                                                                                                                                                                                                                                                                                                                                                                                                                                                                                                                                                                                                                                                                                                                                                                                    |
|--------------------------------------------------------------------------------------------|--------------------------------------------------------------------------------------------------------------------------------------------------------------------------------------------------------------------------------------------------------------------------------------------------------------------------------------------------------------------------------------------------------------------------------------------------------------------------------------------------------------------------------------------------------------------------------------------------------------------------------------------------------------------------------------------------------------------------------------------------------------------------------------------------------------------------------------------------------------------------------------------------------------------------------------------------------------------------------------------------------------------------------------------------------------------------------------------------------------------------------------------------------------------------------------------------------------------------------------------------------------------------------------------------------------------------------------------------------------------------------------------------------------------------------------------------------------------------------------------------------------------------------------------------------------------------------------------------------------------------------------------------------------------------------------------------------------------------------------------------------------------------------------------------------------------------------------------------------------------|
| <div data-bbox="116 226 363 427"> </div> <p data-bbox="108 465 159 495"><b>L-a1</b></p>    | <p>H,0,-0.0511745224,-2.4317844434,-0.5332297206</p> <p>P,0,1.0597703333,0.0122395084,0.0953269675</p> <p>C,0,0.1410320369,0.7605706651,1.5075154337</p> <p>C,0,0.2619636345,-1.6369463696,-0.0428543111</p> <p>C,0,0.2574034746,0.9016152176,-1.3120546419</p> <p>C,0,-0.9763107227,2.0698579975,3.6944938466</p> <p>C,0,-0.8463840361,-4.1884161558,-0.1635736497</p> <p>C,0,-0.7079414384,2.0990979526,-3.6329869041</p> <p>C,0,-0.8090305791,0.1286192141,2.2565438203</p> <p>C,0,-0.9866534227,-1.8340753451,-0.6341825326</p> <p>C,0,-0.7123099096,1.8591967862,-1.2228722174</p> <p>N,0,0.5287227539,2.0206577639,1.8613362316</p> <p>C,0,0.9527087343,-2.7306144335,0.4792297872</p> <p>N,0,0.7335192117,0.5610225384,-2.54443869</p> <p>C,0,0.0223832519,2.7715091746,2.9357662076</p> <p>C,0,0.3957034518,-3.9999504873,0.4255075131</p> <p>C,0,0.3078854311,1.0928034353,-3.7738471364</p> <p>C,0,-1.3636233747,0.8087860243,3.3636029652</p> <p>C,0,-1.5348093772,-3.105758853,-0.6951728129</p> <p>C,0,-1.1862286827,2.4580100578,-2.411325818</p> <p>H,0,-1.1282038957,-0.8705431625,2.0014452219</p> <p>H,0,-1.5338448964,-0.9911235052,-1.0418910954</p> <p>H,0,-1.1192437262,2.1413992039,-0.2633646426</p> <p>H,0,1.2459424399,2.4892274274,1.319264118</p> <p>H,0,1.9287340347,-2.5859674374,0.9288042655</p> <p>H,0,1.4595859559,-0.1429395089,-2.6179358481</p> <p>O,0,0.4466855075,3.9040685152,3.1427769271</p> <p>H,0,0.9370049351,-4.8429178269,0.8368778742</p> <p>O,0,0.8073689776,0.6888949631,-4.8192794208</p> <p>H,0,-2.1186403474,0.3080362653,3.9590822723</p> <p>H,0,-2.503686675,-3.2513069143,-1.1569093767</p> <p>H,0,-1.9559813387,3.2182262314,-2.3405367615</p> <p>H,0,-1.3995619203,2.5894381206,4.5432492518</p> <p>H,0,-1.2774057962,-5.1808023348,-0.2130256024</p> <p>H,0,-1.0721045255,2.5572936717,-4.542302342</p> |
| <div data-bbox="116 1335 320 1570"> </div> <p data-bbox="108 1608 159 1637"><b>L-b</b></p> | <p>P,0,1.3569853073,-0.0761941728,0.0116084657</p> <p>C,0,0.5015890298,0.5433480118,-1.5093586607</p> <p>C,0,0.7158486483,1.0454142018,1.3145081424</p> <p>C,0,0.4142955141,-1.6234150806,0.3806819602</p> <p>C,0,0.0986123328,1.8622117011,-1.650467294</p> <p>H,0,0.171330629,2.555582299,-0.8240976242</p> <p>C,0,-0.405067753,2.2678867709,-2.8826238292</p> <p>H,0,-0.7286111367,3.2917870517,-3.0239720029</p> <p>C,0,-0.4961636453,1.3699077264,-3.9235069045</p> <p>H,0,-0.8802751776,1.6467904473,-4.8951120095</p> <p>C,0,1.6386170098,1.7561094253,2.0792614298</p> <p>H,0,2.6993388353,1.627075806,1.8962384223</p> <p>C,0,-0.6495684545,1.216144629,1.558984928</p> <p>H,0,-1.3763810743,0.6676575607,0.9701923437</p> <p>C,0,-1.0774706019,2.0830466959,2.5502378959</p> <p>C,0,1.2067820982,2.6252770795,3.0730715347</p> <p>H,0,1.931852108,3.1721019411,3.6631008317</p> <p>C,0,-0.1493114525,2.7883072725,3.3084735573</p> <p>H,0,-0.4873138095,3.4647226372,4.0840468414</p> <p>H,0,-2.1374161445,2.209995388,2.7338187145</p> <p>N,0,0.1085496613,-2.4513009962,-0.650734365</p> <p>H,0,0.261206173,-2.0975238993,-1.5964909434</p>                                                                                                                                                                                                                                                                                                                                                                                                                                                                                                                                                                                                                                                                                                            |

|                                                                                                        |                                                                                                                                                                                                                                                                                                                                                                                                                                                                                                                                                                                                                                                                                                                                                                                                                                                                                                                                                                                                                                                                                                                                                                                                                                                                                                                                                                                                                                                                                                                                                                                                                                                                        |
|--------------------------------------------------------------------------------------------------------|------------------------------------------------------------------------------------------------------------------------------------------------------------------------------------------------------------------------------------------------------------------------------------------------------------------------------------------------------------------------------------------------------------------------------------------------------------------------------------------------------------------------------------------------------------------------------------------------------------------------------------------------------------------------------------------------------------------------------------------------------------------------------------------------------------------------------------------------------------------------------------------------------------------------------------------------------------------------------------------------------------------------------------------------------------------------------------------------------------------------------------------------------------------------------------------------------------------------------------------------------------------------------------------------------------------------------------------------------------------------------------------------------------------------------------------------------------------------------------------------------------------------------------------------------------------------------------------------------------------------------------------------------------------------|
|                                                                                                        | C,O,-0.4825164191,-3.7203991984,-0.5451966558<br>O,O,-0.7342680783,-4.3596107564,-1.5656222709<br>C,O,0.1629929893,-2.0377304475,1.6623858139<br>H,O,0.4067997525,-1.4006451435,2.4998548198<br>C,O,-0.4168588621,-3.3067636675,1.856413328<br>H,O,-0.6194812245,-3.6382934494,2.8689421821<br>C,O,-0.7272648446,-4.1229728109,0.8092553341<br>H,O,-1.1711672021,-5.0973249664,0.9616916208<br>N,O,0.4336813881,-0.3389043999,-2.5233829671<br>C,O,-0.0651271749,0.0661501544,-3.6833067913<br>O,O,-0.1479535909,-0.8350011088,-4.6762582101<br>H,O,0.1985705694,-1.672769602,-4.3320826377                                                                                                                                                                                                                                                                                                                                                                                                                                                                                                                                                                                                                                                                                                                                                                                                                                                                                                                                                                                                                                                                            |
| 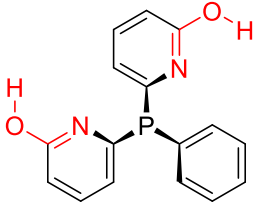 <p><b>L-b1</b></p>   | P,O,-0.0526533425,1.0783537384,0.1239024189<br>C,O,-0.6736835321,0.1518224828,1.5982081913<br>C,O,-1.0171110594,0.2966272479,-1.2488086128<br>C,O,1.5934330828,0.2988332926,-0.1464473427<br>C,O,-1.7837955959,-0.9774034297,3.8343819009<br>C,O,-2.2707959819,-0.6596510576,-3.4882229004<br>C,O,4.1417868642,-0.8048546486,-0.4309329068<br>C,O,0.0778616514,-0.7486472499,2.3371909679<br>C,O,-2.0856728885,-0.5721068394,-1.09613964<br>C,O,1.7624265474,-0.9441861867,-0.7590218028<br>N,O,-1.9259622241,0.5000403837,1.9486151857<br>N,O,-0.581475613,0.6960144101,-2.4565763859<br>C,O,2.7181909667,0.9825842589,0.3143965152<br>C,O,-2.4557234531,-0.0619351589,3.023420666<br>C,O,-1.1895135286,0.2210878279,-3.5314617308<br>C,O,3.9848182586,0.4309646581,0.1792715818<br>C,O,-0.4983114792,-1.3141031431,3.4720663477<br>C,O,-2.7135715716,-1.05016466,-2.2436165746<br>C,O,3.0287006046,-1.4899478022,-0.9018194951<br>H,O,1.0837543521,-1.0092852142,2.0382995168<br>H,O,-2.4202558901,-0.8751186933,-0.1145104035<br>H,O,0.8990878449,-1.4913510439,-1.1216815951<br>O,O,-3.7155606845,0.2856962299,3.3464780999<br>O,O,-0.7305750401,0.6241216038,-4.7312500653<br>H,O,4.8495486021,0.9718867253,0.5440855761<br>H,O,0.0636599371,-2.020562245,4.0708712076<br>H,O,-3.5483713034,-1.7353178457,-2.1585913318<br>H,O,3.1473603102,-2.4551886429,-1.379376759<br>H,O,-2.2668428379,-1.3925751884,4.7079694347<br>H,O,-2.7296612947,-1.0096987076,-4.4024287973<br>H,O,5.1302214148,-1.2333877176,-0.543761219<br>H,O,-3.9992049809,0.9307729328,2.6800449863<br>H,O,0.0095677688,1.2244529784,-4.5511138303<br>H,O,2.599919396,1.9539418041,0.7822759963 |
| 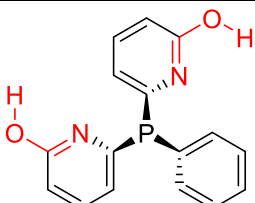 <p><b>L-b2</b></p> | P,O,0.2916389029,1.3732199309,-0.1270773748<br>C,O,-1.3835209612,0.8684323248,-0.7243592888<br>C,O,0.3257550058,0.6438815808,1.5632609724<br>C,O,1.3883416687,0.1812599349,-1.0226694276<br>C,O,-3.8455888736,0.3575700212,-1.8130347345<br>C,O,0.2792941718,-0.348548876,4.1721092302<br>C,O,3.2672598173,-1.4397005894,-2.1816881725<br>N,O,-1.6177343174,1.2298962858,-1.9997926723<br>C,O,0.5599800584,-0.7100381316,1.8101286465<br>N,O,2.6587613214,0.2463252537,-0.5870179108<br>C,O,-2.34944507,0.2583305587,0.0608337564                                                                                                                                                                                                                                                                                                                                                                                                                                                                                                                                                                                                                                                                                                                                                                                                                                                                                                                                                                                                                                                                                                                                      |

|                                                                                                       |                                                                                                                                                                                                                                                                                                                                                                                                                                                                                                                                                                                                                                                                                                                                                                                                                                                                                                                                                                                                                                                                                                                                                                                                                                                                                                                                                                                                                                                                                                                                                                                                                                                       |
|-------------------------------------------------------------------------------------------------------|-------------------------------------------------------------------------------------------------------------------------------------------------------------------------------------------------------------------------------------------------------------------------------------------------------------------------------------------------------------------------------------------------------------------------------------------------------------------------------------------------------------------------------------------------------------------------------------------------------------------------------------------------------------------------------------------------------------------------------------------------------------------------------------------------------------------------------------------------------------------------------------------------------------------------------------------------------------------------------------------------------------------------------------------------------------------------------------------------------------------------------------------------------------------------------------------------------------------------------------------------------------------------------------------------------------------------------------------------------------------------------------------------------------------------------------------------------------------------------------------------------------------------------------------------------------------------------------------------------------------------------------------------------|
|                                                                                                       | C,0,0.0752439013,1.4929030646,2.6409341068<br>C,0,0.9979390973,-0.6679163008,-2.045565488<br>C,0,-3.596766407,0.005647247,-0.5048502808<br>C,0,0.0452698348,0.9984895595,3.937677928<br>C,0,1.9640517155,-1.4862433269,-2.6256231016<br>C,0,-2.8065779223,0.9661696509,-2.518222568<br>C,0,0.5390265607,-1.2010364064,3.1063456647<br>C,0,3.5561086042,-0.5473170956,-1.1487503087<br>H,0,-2.1391913317,-0.0186955801,1.0846199879<br>H,0,-0.0974518785,2.5486435501,2.4619842732<br>H,0,-0.0285286358,-0.6990169999,-2.3813551162<br>H,0,-4.3727686688,-0.4691838325,0.0832139541<br>H,0,-0.1530788628,1.6688008653,4.7651953298<br>H,0,1.690056873,-2.1655401226,-3.4237693676<br>H,0,-4.7999366147,0.180057166,-2.2890252458<br>H,0,0.2635296441,-0.7346130429,5.1840774197<br>H,0,4.0456211632,-2.0598064914,-2.6041635396<br>H,0,0.7227370723,-2.253639714,3.2855318<br>O,0,4.8198566441,-0.4751765096,-0.6901769034<br>O,0,-3.0147145977,1.3188970655,-3.800667954<br>H,0,4.8157449979,0.1926317003,0.0131533829<br>H,0,-2.1919434849,1.7316228749,-4.1063086409<br>H,0,0.7544880715,-1.3856370152,0.9842969432                                                                                                                                                                                                                                                                                                                                                                                                                                                                                                                                 |
| 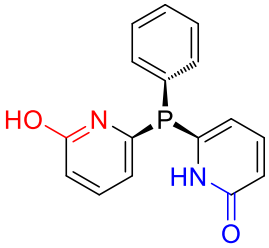 <p><b>L-b3</b></p> | P,0,1.3092847636,-0.1826531302,0.0625773566<br>C,0,0.5424554037,0.4946728536,-1.475171298<br>C,0,0.7434635665,1.0060993397,1.3501500431<br>C,0,0.1727420497,-1.596757487,0.4100366706<br>C,0,-0.149612099,1.6921996865,-1.5403964447<br>H,0,-0.3299842402,2.2803865222,-0.6513612314<br>C,0,-0.6121837338,2.1151215024,-2.7848346951<br>H,0,-1.1565071468,3.0473535868,-2.8728191103<br>C,0,-0.3796444402,1.3476502268,-3.9039106753<br>H,0,-0.7204031295,1.6407085946,-4.8871988387<br>C,0,1.6531217761,1.9751093373,1.7745017305<br>H,0,2.6563049916,1.9866609821,1.3624435039<br>C,0,-0.5399551611,0.99258619,1.899408058<br>H,0,-1.2599149306,0.2476233228,1.5778370389<br>C,0,-0.9037807387,1.9331097298,2.8506611267<br>C,0,1.28259709,2.9226607652,2.7180017695<br>H,0,1.9960679581,3.6726598933,3.0367432229<br>C,0,0.0051688371,2.9007003994,3.258944838<br>H,0,-0.2819374536,3.6344636598,4.00214025<br>H,0,-1.9013662371,1.9124321092,3.2723596904<br>N,0,0.4391860791,-2.2662756785,1.56910544<br>H,0,1.2026596298,-1.9509818821,2.1570531722<br>C,0,-0.2567026754,-3.3816562352,2.064529796<br>O,0,0.0776851735,-3.8846651424,3.1336839855<br>C,0,-0.8520204555,-2.0368185832,-0.3787641125<br>H,0,-1.0884226568,-1.5285888106,-1.3008040918<br>C,0,-1.5962131209,-3.161374825,0.0388128998<br>H,0,-2.4107038954,-3.5088184995,-0.5871466509<br>C,0,-1.3226903975,-3.8104464645,1.2033436401<br>H,0,-1.8944596036,-4.6711770535,1.5223207812<br>N,0,0.7907314037,-0.25969033,-2.5602825134<br>C,0,0.3280342147,0.1570429261,-3.7282663382<br>O,0,0.5685156424,-0.6163410928,-4.802190963<br>H,0,1.0730658366,-1.3804531131,-4.4822761509 |

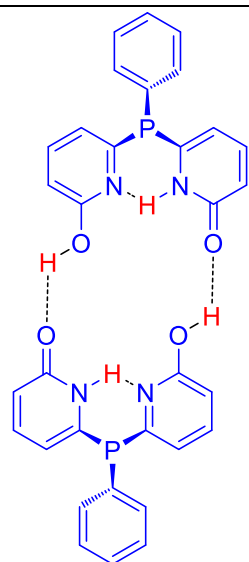

**L6D**

P,0,5.2341276093,-0.1249499177,0.2838921654  
 P,0,-5.2341276093,0.1249499177,-0.2838921654  
 C,0,3.9284133034,0.2923688031,-0.9579967827  
 C,0,-3.9284133034,-0.2923688031,0.9579967827  
 C,0,6.455011888,1.229368174,0.068518433  
 C,0,-6.455011888,-1.229368174,-0.068518433  
 C,0,4.4334002505,0.3933897075,1.8677024369  
 C,0,-4.4334002505,-0.3933897075,-1.8677024369  
 C,0,4.1986963568,1.0178426237,-2.1070641666  
 C,0,-4.1986963568,-1.0178426237,2.1070641666  
 H,0,5.1677871486,1.4694036248,-2.2681683336  
 H,0,-5.1677871486,-1.4694036248,2.2681683336  
 C,0,3.1769313485,1.1469879912,-3.0433025531  
 C,0,-3.1769313485,-1.1469879912,3.0433025531  
 H,0,3.3447756351,1.7090661521,-3.9543685461  
 H,0,-3.3447756351,-1.7090661521,3.9543685461  
 C,0,1.9537648019,0.5571482792,-2.8178294771  
 C,0,-1.9537648019,-0.5571482792,2.8178294771  
 H,0,1.1428995065,0.6299942286,-3.5302366418  
 H,0,-1.1428995065,-0.6299942286,3.5302366418  
 C,0,7.7648996694,0.8856288637,-0.2593693865  
 C,0,-7.7648996694,-0.8856288637,0.2593693865  
 H,0,8.0347786425,-0.1590925405,-0.3646227682  
 H,0,-8.0347786425,0.1590925405,0.3646227682  
 C,0,6.1168624966,2.5785731347,0.2040421771  
 C,0,-6.1168624966,-2.5785731347,-0.2040421771  
 H,0,5.0998460768,2.8573181871,0.4570107199  
 H,0,-5.0998460768,-2.8573181871,-0.4570107199  
 C,0,7.0745840777,3.560420794,0.0147079424  
 C,0,-7.0745840777,-3.560420794,-0.0147079424  
 C,0,8.7237555873,1.872543235,-0.4501498278  
 C,0,-8.7237555873,-1.872543235,0.4501498278  
 H,0,9.7394771565,1.5951460641,-0.7038248251  
 H,0,-9.7394771565,-1.5951460641,0.7038248251  
 C,0,8.37944599,3.2080694606,-0.3124381296  
 C,0,-8.37944599,-3.2080694606,0.3124381296  
 H,0,9.1266983094,3.9784477447,-0.4589492151  
 H,0,-9.1266983094,-3.9784477447,0.4589492151  
 H,0,6.804290926,4.6039453971,0.1212842213  
 H,0,-6.804290926,-4.6039453971,-0.1212842213  
 N,0,3.0986795876,0.2009527404,2.0299875766  
 N,0,-3.0986795876,-0.2009527404,-2.0299875766  
 H,0,2.5762738826,-0.1265337197,1.2074677711  
 H,0,-2.5762738826,0.1265337197,-1.2074677711  
 C,0,2.3876765772,0.4512873956,3.1969409713  
 C,0,-2.3876765772,-0.4512873956,-3.1969409713  
 O,0,1.1530517775,0.2831727162,3.2215899671  
 O,0,-1.1530517775,-0.2831727162,-3.2215899671  
 C,0,5.1755317727,0.8376099712,2.9325646631  
 C,0,-5.1755317727,-0.8376099712,-2.9325646631  
 H,0,6.2390868014,0.9941072071,2.8234305479  
 H,0,-6.2390868014,-0.9941072071,-2.8234305479  
 C,0,4.5259352227,1.0821910056,4.1524251657  
 C,0,-4.5259352227,-1.0821910056,-4.1524251657  
 H,0,5.1079439061,1.4316184301,4.9975894617  
 H,0,-5.1079439061,-1.4316184301,-4.9975894617  
 C,0,3.1803644944,0.8933665638,4.2936295091

|  |                                                                                                                                                                                                                                                                                                                                                                                                                                                                                                                                      |
|--|--------------------------------------------------------------------------------------------------------------------------------------------------------------------------------------------------------------------------------------------------------------------------------------------------------------------------------------------------------------------------------------------------------------------------------------------------------------------------------------------------------------------------------------|
|  | C,O,-3.1803644944,-0.8933665638,-4.2936295091<br>H,O,2.6717404698,1.0841888648,5.2281719791<br>H,O,-2.6717404698,-1.0841888648,-5.2281719791<br>N,O,2.7436463328,-0.2938582898,-0.7214819065<br>N,O,-2.7436463328,0.2938582898,0.7214819065<br>C,O,1.7743179246,-0.165141063,-1.6287190146<br>C,O,-1.7743179246,0.165141063,1.6287190146<br>O,O,0.6413313026,-0.7901671153,-1.332908711<br>O,O,-0.6413313026,0.7901671153,1.332908711<br>H,O,-0.0498744686,-0.5791688069,-2.0148760652<br>H,O,0.0498744686,0.5791688069,2.0148760652 |
|--|--------------------------------------------------------------------------------------------------------------------------------------------------------------------------------------------------------------------------------------------------------------------------------------------------------------------------------------------------------------------------------------------------------------------------------------------------------------------------------------------------------------------------------------|

**Supplementary Table 17.** M06L/TZVP optimized Cartesian Coordinates in toluene.

|                                                                                               |                                                                                                                                                                                                                                                                                                                                                                                                                                                                                                                                                                                                                                                                                                                                                                                                                                                                                                                                                                                                                                                                                                                                                                                                                                                                                                                                                                                                                                                                                                                                                                                                                 |
|-----------------------------------------------------------------------------------------------|-----------------------------------------------------------------------------------------------------------------------------------------------------------------------------------------------------------------------------------------------------------------------------------------------------------------------------------------------------------------------------------------------------------------------------------------------------------------------------------------------------------------------------------------------------------------------------------------------------------------------------------------------------------------------------------------------------------------------------------------------------------------------------------------------------------------------------------------------------------------------------------------------------------------------------------------------------------------------------------------------------------------------------------------------------------------------------------------------------------------------------------------------------------------------------------------------------------------------------------------------------------------------------------------------------------------------------------------------------------------------------------------------------------------------------------------------------------------------------------------------------------------------------------------------------------------------------------------------------------------|
|                                                                                               | M06L-SCRF/TZVP in toluene                                                                                                                                                                                                                                                                                                                                                                                                                                                                                                                                                                                                                                                                                                                                                                                                                                                                                                                                                                                                                                                                                                                                                                                                                                                                                                                                                                                                                                                                                                                                                                                       |
| 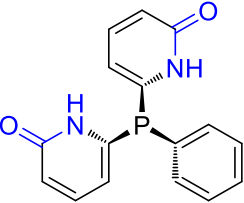 <p>L-a</p> | P,O,-1.4915631564,-0.0020982304,-0.0418852146<br>C,O,-0.6649908197,-1.2598850233,1.0376439834<br>C,O,-0.7358317399,1.5578140072,0.5723418907<br>C,O,-0.5560934355,-0.282687855,-1.6137052143<br>C,O,0.357795041,-3.3276989536,2.5974747251<br>C,O,0.291257497,4.017693432,1.3888742191<br>C,O,0.8677432122,-0.7175028357,-3.9653969159<br>N,O,-0.1261058422,-2.3731968091,0.477129876<br>C,O,0.5498085947,1.6429583725,1.1150633453<br>N,O,0.5542203423,0.4410075023,-1.9130961713<br>C,O,-0.7109301787,-1.1630179235,2.401169371<br>C,O,-1.4980423243,2.7202081629,0.4474468849<br>C,O,-0.9793098078,-1.2402462248,-2.4937826969<br>C,O,-0.1782860779,-2.216545839,3.1730442213<br>C,O,-0.9852635421,3.9434035637,0.8523819181<br>C,O,-0.2332134403,-1.4590456436,-3.6753117037<br>C,O,0.4140348518,-3.4784897892,1.1705448141<br>C,O,1.0575689495,2.8675511414,1.5200448805<br>C,O,1.3342931838,0.3192416731,-3.0822176771<br>H,O,-1.1430168793,-0.2897441451,2.8684852024<br>H,O,-2.4991906974,2.6630198934,0.0354037728<br>H,O,-1.8786533105,-1.8033817249,-2.2856950397<br>H,O,-0.2038319655,-2.1355046511,4.2539772085<br>H,O,-1.5863168763,4.8384593914,0.7525179231<br>H,O,-0.5583437855,-2.229032778,-4.3653419995<br>H,O,0.7620703282,-4.136867775,3.1893006047<br>H,O,0.6904141144,4.9724426574,1.7077360342<br>H,O,1.4347612274,-0.8725820913,-4.8726544049<br>H,O,2.0553971015,2.9230522928,1.9368450003<br>O,O,2.2968444832,1.0539727948,-3.2480490538<br>O,O,0.8688227009,-4.4223816252,0.5382908646<br>H,O,1.151137764,0.7476113127,1.2272340353<br>H,O,0.8640261041,1.1602694065,-1.2685296603 |

|                                                                                                       |                                                                                                                                                                                                                                                                                                                                                                                                                                                                                                                                                                                                                                                                                                                                                                                                                                                                                                                                                                                                                                                                                                                                                                                                                                                                                                                                                                                                                                                                                                                                                                                                                                                                                                                                                                                                                                                                    |
|-------------------------------------------------------------------------------------------------------|--------------------------------------------------------------------------------------------------------------------------------------------------------------------------------------------------------------------------------------------------------------------------------------------------------------------------------------------------------------------------------------------------------------------------------------------------------------------------------------------------------------------------------------------------------------------------------------------------------------------------------------------------------------------------------------------------------------------------------------------------------------------------------------------------------------------------------------------------------------------------------------------------------------------------------------------------------------------------------------------------------------------------------------------------------------------------------------------------------------------------------------------------------------------------------------------------------------------------------------------------------------------------------------------------------------------------------------------------------------------------------------------------------------------------------------------------------------------------------------------------------------------------------------------------------------------------------------------------------------------------------------------------------------------------------------------------------------------------------------------------------------------------------------------------------------------------------------------------------------------|
| 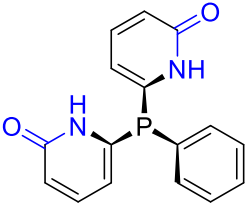 <p><b>L-a1</b></p>  | <p>H,0,-0.0786880167,-2.4440235861,-0.5346120235</p> <p>P,0,1.0560289831,0.0153859884,0.0977415175</p> <p>C,0,0.1375915365,0.7610229419,1.5112006469</p> <p>C,0,0.2627851137,-1.6361699008,-0.0426641411</p> <p>C,0,0.2523159666,0.9029688864,-1.3094761537</p> <p>C,0,-0.9804230431,2.071840886,3.6999456292</p> <p>C,0,-0.8370662712,-4.1907817689,-0.1693594863</p> <p>C,0,-0.7097258788,2.0972902333,-3.6359809401</p> <p>C,0,-0.8180064076,0.1333206845,2.2558072132</p> <p>C,0,-0.9851896281,-1.836459862,-0.6341890073</p> <p>C,0,-0.7062749499,1.8712419289,-1.2233455459</p> <p>N,0,0.529464993,2.0189880075,1.8690284395</p> <p>C,0,0.9569930247,-2.7292318601,0.4759874983</p> <p>N,0,0.7193937547,0.5495698604,-2.5418369992</p> <p>C,0,0.024559196,2.7736340091,2.9464815271</p> <p>C,0,0.4042818264,-3.9998886288,0.4195468975</p> <p>C,0,0.2953381462,1.0777563313,-3.7775359719</p> <p>C,0,-1.3719288431,0.8144549582,3.3640253055</p> <p>C,0,-1.5289768571,-3.1094937967,-0.6981532185</p> <p>C,0,-1.1778513767,2.468270466,-2.4152410292</p> <p>H,0,-1.1411824208,-0.8632633615,1.9962039469</p> <p>H,0,-1.5336284477,-0.9938579694,-1.0407234126</p> <p>H,0,-1.1052345729,2.1638804829,-0.2637258083</p> <p>H,0,1.2537194381,2.4861273627,1.3364005905</p> <p>H,0,1.9331521135,-2.5821152798,0.9244113575</p> <p>H,0,1.4376316494,-0.1612539517,-2.6169731181</p> <p>O,0,0.4541066848,3.8998628848,3.1541756331</p> <p>H,0,0.9484281968,-4.8422195989,0.8280979178</p> <p>O,0,0.7860073894,0.6608604785,-4.8173857513</p> <p>H,0,-2.1306262366,0.3155421972,3.9563885884</p> <p>H,0,-2.4967983172,-3.2574464162,-1.1610198222</p> <p>H,0,-1.9378173558,3.2383830043,-2.3456992532</p> <p>H,0,-1.4016127677,2.5918802258,4.54904419</p> <p>H,0,-1.2643838391,-5.1844705113,-0.2217359049</p> <p>H,0,-1.0706212995,2.5535794881,-4.5471724349</p> |
| 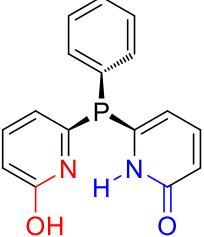 <p><b>L-b</b></p> | <p>P,0,1.3564435174,-0.0737787173,0.0131920341</p> <p>C,0,0.4995351646,0.5446572163,-1.509002831</p> <p>C,0,0.7098127429,1.0495114295,1.3137929405</p> <p>C,0,0.4178897318,-1.6225866945,0.3847284412</p> <p>C,0,0.1285455022,1.8721994652,-1.6606987614</p> <p>H,0,0.2231039807,2.5700624952,-0.8403402271</p> <p>C,0,-0.3722129249,2.2792336748,-2.8932024265</p> <p>H,0,-0.6701943624,3.3098755332,-3.0419169991</p> <p>C,0,-0.4940296494,1.3746701825,-3.9248238008</p> <p>H,0,-0.8784040956,1.6500157304,-4.8965214619</p> <p>C,0,1.6307716244,1.7520799358,2.088228946</p> <p>H,0,2.6916716088,1.6167297314,1.9110298434</p> <p>C,0,-0.6559021128,1.2272150071,1.551169768</p> <p>H,0,-1.3815399648,0.6835987696,0.9566877642</p> <p>C,0,-1.0852838398,2.092399955,2.5429248026</p> <p>C,0,1.1977919058,2.6191239571,3.0829417382</p> <p>H,0,1.9219140312,3.1589768968,3.6803443784</p> <p>C,0,-0.1584791429,2.7890712719,3.3099835206</p> <p>H,0,-0.4977134252,3.4638009874,4.0863578555</p> <p>H,0,-2.145570312,2.2240132128,2.7205480413</p> <p>N,0,0.130053532,-2.4546726522,-0.6477404352</p> <p>H,0,0.2784998452,-2.0964779005,-1.5915607666</p>                                                                                                                                                                                                                                                                                                                                                                                                                                                                                                                                                                                                                                                                                                       |

|                                                                                                      |                                                                                                                                                                                                                                                                                                                                                                                                                                                                                                                                                                                                                                                                                                                                                                                                                                                                                                                                                                                                                                                                                                                                                                                                                                                                                                                                                                                                                                                                                                                                                                                                                                                                                                                                        |
|------------------------------------------------------------------------------------------------------|----------------------------------------------------------------------------------------------------------------------------------------------------------------------------------------------------------------------------------------------------------------------------------------------------------------------------------------------------------------------------------------------------------------------------------------------------------------------------------------------------------------------------------------------------------------------------------------------------------------------------------------------------------------------------------------------------------------------------------------------------------------------------------------------------------------------------------------------------------------------------------------------------------------------------------------------------------------------------------------------------------------------------------------------------------------------------------------------------------------------------------------------------------------------------------------------------------------------------------------------------------------------------------------------------------------------------------------------------------------------------------------------------------------------------------------------------------------------------------------------------------------------------------------------------------------------------------------------------------------------------------------------------------------------------------------------------------------------------------------|
|                                                                                                      | <p> C,O,-0.454510738,-3.7293656914,-0.5500750088<br/> O,O,-0.6938865788,-4.3645003608,-1.5723584523<br/> C,O,0.1579702797,-2.0372990581,1.6639716837<br/> H,O,0.3868452677,-1.396997252,2.5030389247<br/> C,O,-0.4121633263,-3.3128798671,1.8523484791<br/> H,O,-0.6208246602,-3.6455282112,2.8633374861<br/> C,O,-0.7054853616,-4.1330695388,0.8046531642<br/> H,O,-1.1418222811,-5.1111655994,0.952592596<br/> N,O,0.4014620837,-0.3435158572,-2.5148138537<br/> C,O,-0.0964407684,0.0619097587,-3.6748113069<br/> O,O,-0.213843523,-0.8450599833,-4.6570509342<br/> H,O,0.100831649,-1.6915807273,-4.3064001427 HF=-1219.0325556<br/> ZPE= 0.258893<br/> NImag=0<br/> Htot= -1218.755036<br/> Gtot= -1218.821567 </p>                                                                                                                                                                                                                                                                                                                                                                                                                                                                                                                                                                                                                                                                                                                                                                                                                                                                                                                                                                                                               |
| 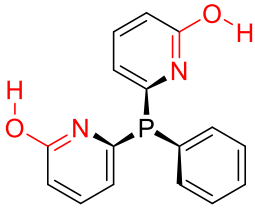 <p><b>L-b1</b></p> | <p> P,O,-0.0700403309,1.0673043332,0.1351251176<br/> C,O,-0.6767283612,0.1216282542,1.60418471<br/> C,O,-1.0323662599,0.3010303049,-1.2489427307<br/> C,O,1.580429711,0.300553723,-0.1447989668<br/> C,O,-1.750909829,-1.0161762589,3.8561516629<br/> C,O,-2.2868403345,-0.6166835885,-3.5051301227<br/> C,O,4.1376777702,-0.7785287632,-0.4443152653<br/> C,O,0.1050334859,-0.740934455,2.3591264092<br/> C,O,-2.1827229236,-0.4600103543,-1.1109327401<br/> C,O,1.7560637693,-0.9542009862,-0.730681366<br/> N,O,-1.9413269515,0.425935441,1.9480982272<br/> N,O,-0.5201926769,0.6156095065,-2.4503046497<br/> C,O,2.7037078276,1.0073887021,0.2817733928<br/> C,O,-2.4525288522,-0.138279652,3.0300713906<br/> C,O,-1.1296283859,0.1617387071,-3.5324345975<br/> C,O,3.9749878648,0.4686692111,0.1390428563<br/> C,O,-0.4532312239,-1.3109501093,3.4997005903<br/> C,O,-2.8077696548,-0.9206156823,-2.2662873708<br/> C,O,3.0259007939,-1.4877528803,-0.8810477258<br/> H,O,1.1204520818,-0.9682043629,2.0657659016<br/> H,O,-2.5813706333,-0.6863031722,-0.1329211383<br/> H,O,0.893385831,-1.5179267851,-1.0679490062<br/> O,O,-3.7254649307,0.1697638524,3.3422656609<br/> O,O,-0.5897856357,0.48235079,-4.723379993<br/> H,O,4.838658469,1.0285233993,0.4765913563<br/> H,O,0.1330228237,-1.9880389472,4.1091958005<br/> H,O,-3.7051396637,-1.523138338,-2.19218775<br/> H,O,3.1492068722,-2.462189552,-1.338226098<br/> H,O,-2.2216230244,-1.434699934,4.734601081<br/> H,O,-2.7410063038,-0.9555798026,-4.4256376463<br/> H,O,5.1293774983,-1.1976086358,-0.5633190383<br/> H,O,-4.0191588565,0.8016019307,2.6688212557<br/> H,O,0.1919142808,1.0191500676,-4.5237473854<br/> H,O,2.5796110529,1.9882891368,0.7274453779 </p> |
| 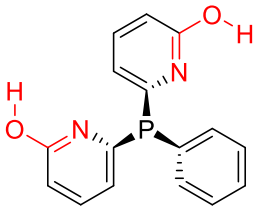                  | <p> P,O,0.2777807398,1.3648301395,-0.1440449914<br/> C,O,-1.397814484,0.8410433621,-0.7258843967<br/> C,O,0.3246902411,0.6452546826,1.5501590635<br/> C,O,1.3897545185,0.1845682724,-1.0381302902<br/> C,O,-3.8775436767,0.3284841243,-1.7785223521<br/> C,O,0.2996117932,-0.327369062,4.166840487<br/> C,O,3.2957025605,-1.404262133,-2.1997093851 </p>                                                                                                                                                                                                                                                                                                                                                                                                                                                                                                                                                                                                                                                                                                                                                                                                                                                                                                                                                                                                                                                                                                                                                                                                                                                                                                                                                                               |

|                                                                                                        |                                                                                                                                                                                                                                                                                                                                                                                                                                                                                                                                                                                                                                                                                                                                                                                                                                                                                                                                                                                                                                                                                                                                                                                                                                                                                                                                                                                                                                                                                                                                 |
|--------------------------------------------------------------------------------------------------------|---------------------------------------------------------------------------------------------------------------------------------------------------------------------------------------------------------------------------------------------------------------------------------------------------------------------------------------------------------------------------------------------------------------------------------------------------------------------------------------------------------------------------------------------------------------------------------------------------------------------------------------------------------------------------------------------------------------------------------------------------------------------------------------------------------------------------------------------------------------------------------------------------------------------------------------------------------------------------------------------------------------------------------------------------------------------------------------------------------------------------------------------------------------------------------------------------------------------------------------------------------------------------------------------------------------------------------------------------------------------------------------------------------------------------------------------------------------------------------------------------------------------------------|
| <p><b>L-b2</b></p>                                                                                     | <p>N,0,-1.6382323199,1.1579351238,-2.0111348969<br/> C,0,0.5299726492,-0.7119636064,1.8037975219<br/> N,0,2.6297848862,0.1746089927,-0.5216251492<br/> C,0,-2.3683555045,0.2734644464,0.0871388963<br/> C,0,0.1136006693,1.5065869816,2.6257434205<br/> C,0,1.0441625381,-0.5703055233,-2.1482122875<br/> C,0,-3.6224767289,0.0190479859,-0.4605282431<br/> C,0,0.0945734736,1.0226350949,3.9265783921<br/> C,0,2.0227750027,-1.3739911241,-2.7262191525<br/> C,0,-2.8346272535,0.8951497047,-2.511049617<br/> C,0,0.519737183,-1.1932129503,3.1030543157<br/> C,0,3.5400582,-0.6010039419,-1.085755713<br/> H,0,-2.153958957,0.030487734,1.1185376384<br/> H,0,-0.0350780562,2.5648433747,2.4408723819<br/> H,0,0.0430862588,-0.5326245728,-2.5520209968<br/> H,0,-4.4004524675,-0.4232612912,0.1499991739<br/> H,0,-0.0722516002,1.7032900603,4.7525207643<br/> H,0,1.7828533921,-1.9808306671,-3.5910778852<br/> H,0,-4.8375328023,0.1498410613,-2.2421104118<br/> H,0,0.2924478605,-0.7059453533,5.1816738984<br/> H,0,4.0832598404,-2.0152083056,-2.6179793291<br/> H,0,0.6812845134,-2.248584927,3.2869991494<br/> O,0,4.7717460728,-0.6006675912,-0.5421401375<br/> O,0,-3.0435499071,1.2061607312,-3.8042416388<br/> H,0,4.7308117667,0.0141998718,0.2057392791<br/> H,0,-2.2177890673,1.6036575723,-4.1190716537<br/> H,0,0.695426165,-1.3961896671,0.9790494451</p>                                                                                                                                                   |
| <p><b>L-b3</b></p> 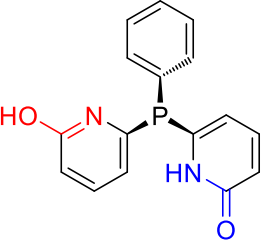 | <p>P,0,1.2981789121,-0.1864399027,0.0372380345<br/> C,0,0.5179261491,0.5035399541,-1.4889631406<br/> C,0,0.7431061987,0.996974783,1.3358973563<br/> C,0,0.1701123851,-1.6032582399,0.3999789938<br/> C,0,-0.1375115471,1.7229562471,-1.5457843007<br/> H,0,-0.2903925075,2.3143109672,-0.6538836669<br/> C,0,-0.5980121606,2.1624492403,-2.7846168053<br/> H,0,-1.1132335187,3.111790529,-2.8651251417<br/> C,0,-0.3992635924,1.3919937409,-3.908303148<br/> H,0,-0.7378359332,1.6972883172,-4.8883833879<br/> C,0,1.6690616536,1.9368663121,1.788995656<br/> H,0,2.6777308718,1.9295712513,1.3906051249<br/> C,0,-0.5476739143,1.0059126881,1.8687810505<br/> H,0,-1.2792728739,0.2824320431,1.5253475595<br/> C,0,-0.9013350199,1.9379716076,2.831277944<br/> C,0,1.3091325478,2.8766839572,2.7440081587<br/> H,0,2.0359326741,3.6031300382,3.0859444404<br/> C,0,0.0250287277,2.8760514158,3.2677534259<br/> H,0,-0.2539944481,3.6026475821,4.0208360319<br/> H,0,-1.9040445009,1.9334475611,3.2407988524<br/> N,0,0.3776488395,-2.193337622,1.6131544938<br/> H,0,1.0797848136,-1.812561045,2.2366328703<br/> C,0,-0.308729252,-3.3092323611,2.1302029137<br/> O,0,-0.030648283,-3.7305948856,3.2456978597<br/> C,0,-0.779164552,-2.1307340202,-0.4276847279<br/> H,0,-0.9589863336,-1.6919124227,-1.3964229218<br/> C,0,-1.5093219923,-3.2587070244,0.007660933<br/> H,0,-2.2641457573,-3.6749815241,-0.6504383399<br/> C,0,-1.2957178611,-3.8289078895,1.2239010113<br/> H,0,-1.8558257485,-4.6919551723,1.5559219456</p> |

|                                                                                                     |                                                                                                                                                                                                                                                                                                                                                                                                                                                                                                                                                                                                                                                                                                                                                                                                                                                                                                                                                                                                                                                                                                                                                                                                                                                                                                                                                                                                                                                                                                                                                                                                                                                                                                                                                                                                                                                                                                                                                                                                                                                                                                                                                                                                                                                                                                                                                                                                                                                                                                                                                                                                 |
|-----------------------------------------------------------------------------------------------------|-------------------------------------------------------------------------------------------------------------------------------------------------------------------------------------------------------------------------------------------------------------------------------------------------------------------------------------------------------------------------------------------------------------------------------------------------------------------------------------------------------------------------------------------------------------------------------------------------------------------------------------------------------------------------------------------------------------------------------------------------------------------------------------------------------------------------------------------------------------------------------------------------------------------------------------------------------------------------------------------------------------------------------------------------------------------------------------------------------------------------------------------------------------------------------------------------------------------------------------------------------------------------------------------------------------------------------------------------------------------------------------------------------------------------------------------------------------------------------------------------------------------------------------------------------------------------------------------------------------------------------------------------------------------------------------------------------------------------------------------------------------------------------------------------------------------------------------------------------------------------------------------------------------------------------------------------------------------------------------------------------------------------------------------------------------------------------------------------------------------------------------------------------------------------------------------------------------------------------------------------------------------------------------------------------------------------------------------------------------------------------------------------------------------------------------------------------------------------------------------------------------------------------------------------------------------------------------------------|
|                                                                                                     | N,0,0.7300475686,-0.2544456643,-2.5779299254<br>C,0,0.2710757837,0.1792802762,-3.7407711531<br>O,0,0.4780209602,-0.6010829764,-4.8160565885<br>H,0,0.9669040112,-1.3746044615,-4.4970395085                                                                                                                                                                                                                                                                                                                                                                                                                                                                                                                                                                                                                                                                                                                                                                                                                                                                                                                                                                                                                                                                                                                                                                                                                                                                                                                                                                                                                                                                                                                                                                                                                                                                                                                                                                                                                                                                                                                                                                                                                                                                                                                                                                                                                                                                                                                                                                                                     |
| 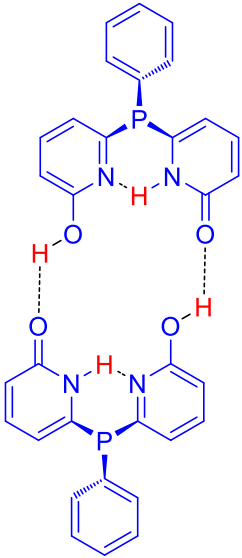 <p><b>L6D</b></p> | P,0,5.224376534,-0.1482336539,0.2776108794<br>P,0,-5.224376534,0.1482336539,-0.2776108794<br>C,0,3.9175720012,0.2780387115,-0.9605469744<br>C,0,-3.9175720012,-0.2780387115,0.9605469744<br>C,0,6.4323310111,1.2228181959,0.0670645532<br>C,0,-6.4323310111,-1.2228181959,-0.0670645532<br>C,0,4.4220382348,0.3699959836,1.8614674037<br>C,0,-4.4220382348,-0.3699959836,-1.8614674037<br>C,0,4.1986092007,0.9679827406,-2.1287323411<br>C,0,-4.1986092007,-0.9679827406,2.1287323411<br>H,0,5.1761331043,1.3960440727,-2.3027567858<br>H,0,-5.1761331043,-1.3960440727,2.3027567858<br>C,0,3.1731132338,1.0934739074,-3.062427178<br>C,0,-3.1731132338,-1.0934739074,3.062427178<br>H,0,3.3472605192,1.6283354043,-3.9886967078<br>H,0,-3.3472605192,-1.6283354043,3.9886967078<br>C,0,1.939934051,0.5358357984,-2.8169694356<br>C,0,-1.939934051,-0.5358357984,2.8169694356<br>H,0,1.1232249079,0.6048018909,-3.5229354855<br>H,0,-1.1232249079,-0.6048018909,3.5229354855<br>C,0,7.7515515001,0.8960883615,-0.2387948746<br>C,0,-7.7515515001,-0.8960883615,0.2387948746<br>H,0,8.0349328751,-0.1464063225,-0.3287366213<br>H,0,-8.0349328751,0.1464063225,0.3287366213<br>C,0,6.0764137883,2.5690764933,0.1819709096<br>C,0,-6.0764137883,-2.5690764933,-0.1819709096<br>H,0,5.0519979044,2.8350366436,0.4171737107<br>H,0,-5.0519979044,-2.8350366436,-0.4171737107<br>C,0,7.0225529202,3.5619380141,-0.0045795665<br>C,0,-7.0225529202,-3.5619380141,0.0045795665<br>C,0,8.7001050821,1.8930379046,-0.4273121416<br>C,0,-8.7001050821,-1.8930379046,0.4273121416<br>H,0,9.7226646357,1.6270620316,-0.6643460852<br>H,0,-9.7226646357,-1.6270620316,0.6643460852<br>C,0,8.3362377627,3.224627636,-0.3095311217<br>C,0,-8.3362377627,-3.224627636,0.3095311217<br>H,0,9.0746768875,4.003392158,-0.4547955792<br>H,0,-9.0746768875,-4.003392158,0.4547955792<br>H,0,6.7366587052,4.602581511,0.0863753923<br>H,0,-6.7366587052,-4.602581511,-0.0863753923<br>N,0,3.0917885402,0.1530947908,2.0269177542<br>N,0,-3.0917885402,-0.1530947908,-2.0269177542<br>H,0,2.5724484392,-0.169169887,1.1969658828<br>H,0,-2.5724484392,0.169169887,-1.1969658828<br>C,0,2.3755083712,0.3994570933,3.1950623544<br>C,0,-2.3755083712,-0.3994570933,-3.1950623544<br>O,0,1.1463615144,0.2264293116,3.2179257313<br>O,0,-1.1463615144,-0.2264293116,-3.2179257313<br>C,0,5.1589263833,0.8293845538,2.9239458777<br>C,0,-5.1589263833,-0.8293845538,-2.9239458777<br>H,0,6.2181676873,1.007830485,2.8090404531<br>H,0,-6.2181676873,-1.007830485,-2.8090404531<br>C,0,4.5080444625,1.0608732138,4.146660166 |

|  |                                                                                                                                                                                                                                                                                                                                                                                                                                                                                                                                                                                                                                                                                                                                       |
|--|---------------------------------------------------------------------------------------------------------------------------------------------------------------------------------------------------------------------------------------------------------------------------------------------------------------------------------------------------------------------------------------------------------------------------------------------------------------------------------------------------------------------------------------------------------------------------------------------------------------------------------------------------------------------------------------------------------------------------------------|
|  | C,0,-4.5080444625,-1.0608732138,-4.146660166<br>H,0,5.0865589802,1.4201170341,4.9903421958<br>H,0,-5.0865589802,-1.4201170341,-4.9903421958<br>C,0,3.1677744791,0.8485268794,4.2926858293<br>C,0,-3.1677744791,-0.8485268794,-4.2926858293<br>H,0,2.6546361934,1.0299241292,5.2259113999<br>H,0,-2.6546361934,-1.0299241292,-5.2259113999<br>N,0,2.7232097525,-0.2728202108,-0.7007325991<br>N,0,-2.7232097525,0.2728202108,0.7007325991<br>C,0,1.7492545628,-0.1482754179,-1.6047275171<br>C,0,-1.7492545628,0.1482754179,1.6047275171<br>O,0,0.6055693476,-0.7310757371,-1.2837755681<br>O,0,-0.6055693476,0.7310757371,1.2837755681<br>H,0,-0.0749999648,-0.5298987647,-1.9769267977<br>H,0,0.0749999648,0.5298987647,1.9769267977 |
|--|---------------------------------------------------------------------------------------------------------------------------------------------------------------------------------------------------------------------------------------------------------------------------------------------------------------------------------------------------------------------------------------------------------------------------------------------------------------------------------------------------------------------------------------------------------------------------------------------------------------------------------------------------------------------------------------------------------------------------------------|

[<sup>1</sup>] Zhao, Y.; Truhlar, D. G. *J. Chem. Phys.*, **125** (2006), 194101: 1-18

[<sup>2</sup>] Schäfer, A., Huber, C., Ahlrichs, R. Fully optimized contracted Gaussian basis sets of triple zeta valence quality for atoms Li to Kr. *J. Chem. Phys.* **100**, 5829-5835

[<sup>3</sup>] Marenich, A. V., Cramer, C. J., Truhlar, D. G. Universal Solvation Model Based on Solute Electron Density and on a Continuum Model of the Solvent Defined by the Bulk Dielectric Constant and Atomic Surface Tensions. *J. Phys. Chem. B* **113**, 6378-6396, doi:10.1021/jp810292n (2009)

[<sup>4</sup>] Frisch, M. J. *et al.* Gaussian 16, Revision A.03. *Gaussian Inc. Gaussian, Inc., Wallingford CT, 2016*

b) IR data

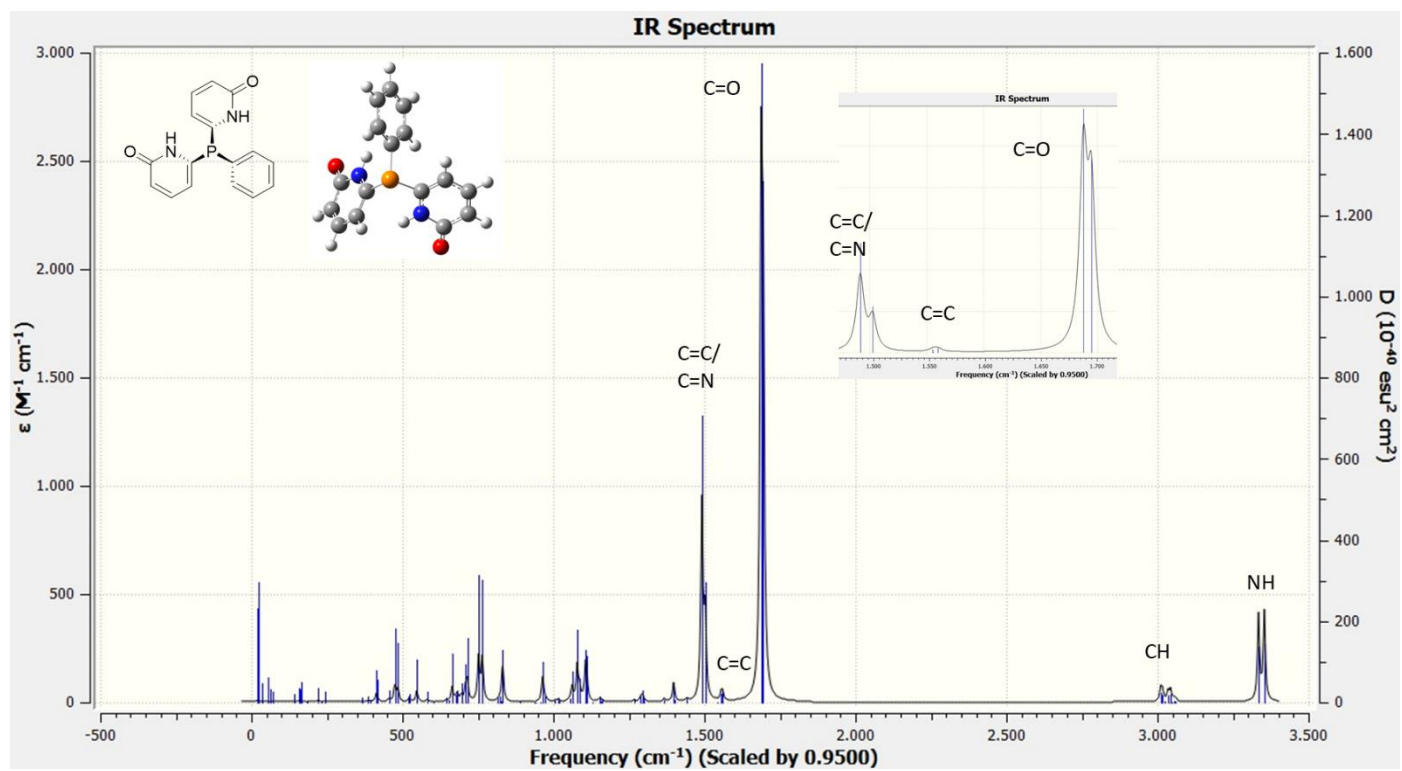

Supplementary Figure 36. Computed IR spectrum for L6-a

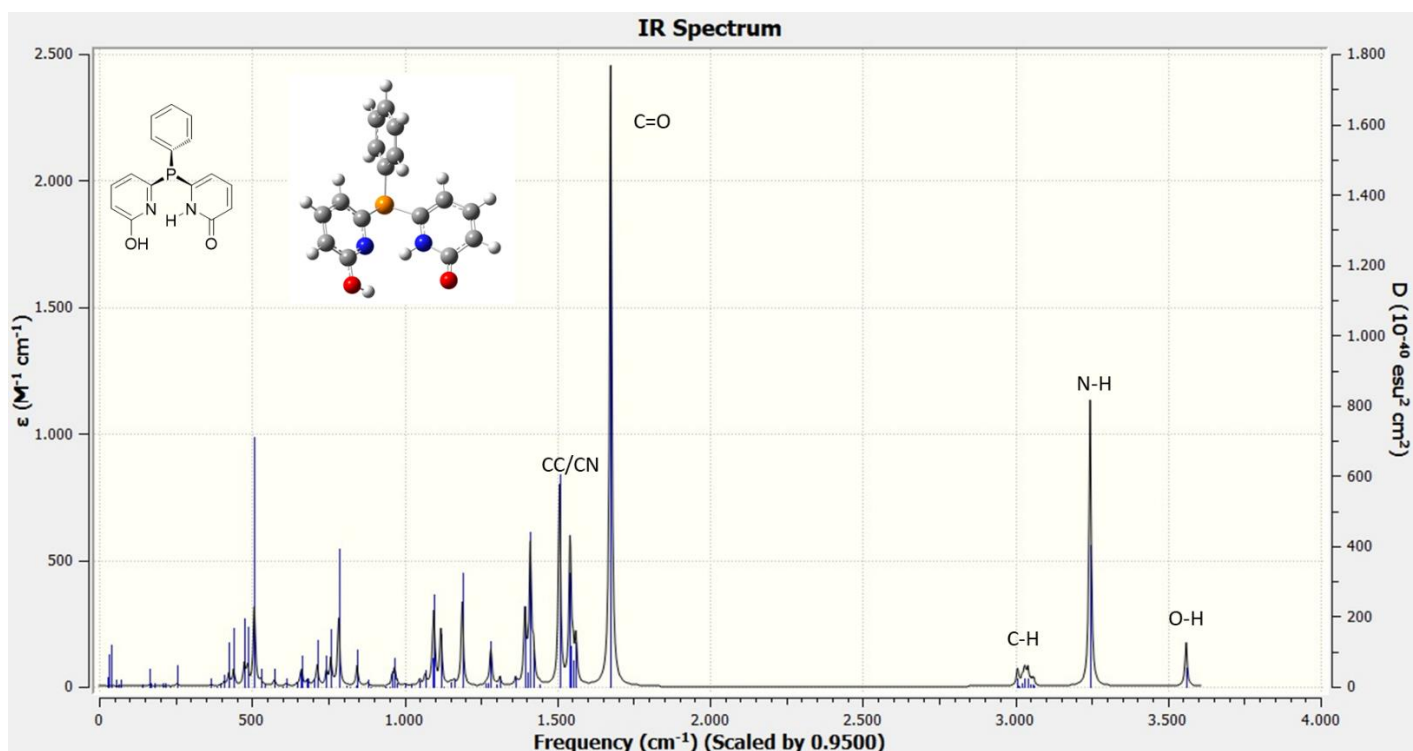

Supplementary Figure 37. Computed IR spectrum for L6-b

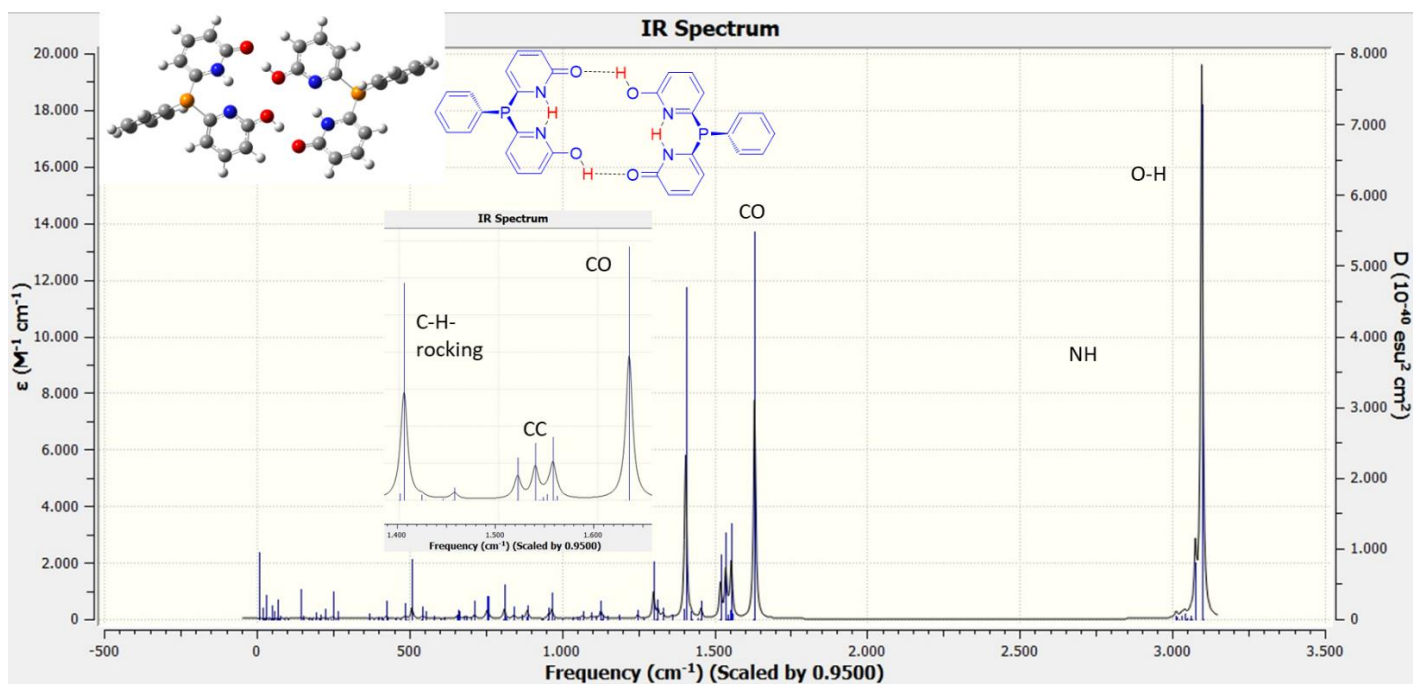

Supplementary Figure 38. Computed IR spectrum of the M06L/TZVP optimized L6D dimer structure via N-H and O-H hydrogen bonding

We investigated the structure of the L6-L6 dimer (L6D). For this purpose, IR spectroscopy is a powerful tool as it allows for the determination of hydrogen-bonding moieties. In general, upon hydrogen bonding N-H or O-H bonds will display a “red shift” or “bond lengthening”,<sup>1</sup> and a broadening of their signals.<sup>2</sup> Indeed, this was proven for the 6-DPPON dimer by Breit et al.<sup>3</sup> In agreement with those results, the ATR IR spectrum of L6 at room temperature showed broad peaks for the stretching of the bond of the donating group O-H ( $\nu_{\text{O-H}} = 2765 \text{ cm}^{-1}$ ) and of the accepting C=O group ( $\nu_{\text{C=O}} = 1641 \text{ cm}^{-1}$ ) as well as the stretching of the accepting group C=N ( $\nu_{\text{N-H}} = 1582 \text{ cm}^{-1}$ ).<sup>4-6</sup> Notably, no  $\nu_{\text{N-H}}$  peak is observed, which was rationalized by DFT calculations for 6-DPPON.<sup>3</sup> To confirm the

structural hypothesis of the **L6-L6** dimer, we performed similar DFT studies. Surprisingly, calculations on the free ligand showed an equilibrium of two tautomers **L6-a** and **L6-b**, the latter being intramolecularly hydrogen-bonded via its nitrogen atoms ( $\text{N}\cdots\text{H-N}$ ). Interestingly, both the tautomerization and the dimerization energy are very dependent on the solvent choice (Supplementary Figure 39c-d). While a transition from **L6-b** to **L6-a** is energetically disfavored in solution (endergonic by 2.1 and 0.62 kcal/mol in THF and toluene, respectively), the formation of the dimer **L6D** occurs spontaneously in toluene according to calculations (exergonic by 1.88 kcal/mol in toluene). In general, the calculations agree with the observed yields, namely a more energetically favored formation of the catalytically active ligand dimer in toluene than THF leads to better yields and regioselectivities. (Supplementary Table 9, entries 1, 3). Furthermore, the IR vibrational profiles of **L6-a**, **L6-b** and **L6D** were calculated using M06L/TZVP and compared to their experimental counterparts. As usual, DFT obtained vibrations were scaled by a factor of 0,9500.<sup>7, 8</sup> By comparison, in solid-state **L6** exists mainly as the **L6D** dimer. Calculated  $\nu_{\text{C=O}}$  fit very well to the experimental data, and the lowering of its wavelength provides a strong proof for  $\text{C=O}\cdots\text{H-X}$  hydrogen bonds. Similar lowering of  $\nu_{\text{C=N}}$  to values close to the experimental ones, confirmed the presence of  $\text{C=N}\cdots\text{H-X}$  hydrogen bonds, too. Moreover, the absence of a non-hydrogen-bonding  $\text{C=O}$  stretching vibration at  $\sim 1700\text{ cm}^{-1}$  and of “free”  $\text{N-H}$  stretching vibrations at  $\sim 3500\text{ cm}^{-1}$  disproved the existence of a hypothetical **L6D2** species.<sup>3</sup> Finally, we could explain the virtual lack of a  $\text{N-H}$  stretching vibration in the investigated samples as calculations for **L6D** situated it at the same wavelength as the broad  $\text{O-H}$  stretching vibration, most likely resulting in a coalescence of the two peaks. It is important to note that the  $[\text{Rh}(\text{L6D})(\text{CO})\text{Cl}]$  ATR-IR spectrum showed similar vibrations as the free dimer, except for a strong shift of the  $\nu_{\text{CO}}$  band all the way to  $1992\text{ cm}^{-1}$  testifying for stronger  $\pi$ -accepting properties than Xantphos ( $1978\text{ cm}^{-1}$ ) and  $\text{PPh}_3$  ( $1968\text{ cm}^{-1}$ ), but weaker than 6-DPPON ( $2003\text{ cm}^{-1}$ ).<sup>9</sup>

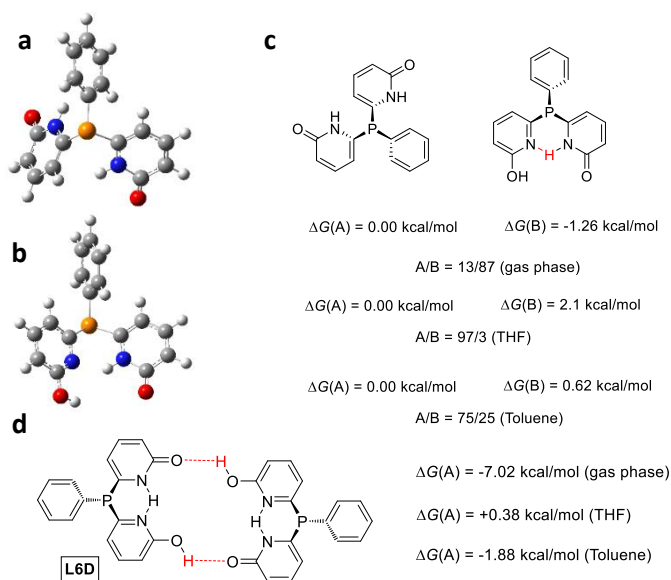

**Supplementary Figure 39.** Computed IR spectrum of the M06L/TZVP optimized **L6D** dimer structure via N-H and O-H hydrogen bonding **a**) Calculated 3D structures for **L6-a**. **b**) Calculated 3D structure for **L6-b**. **c**) Calculated  $\Delta G$  and equilibrium between **L6-a** and **L6-b** in gas-phase, THF and toluene. **d**) Calculated dimer **L6D** structure and dimerization energy in gas-phase, THF and toluene.

|                       | Exp.                   | <b>L6-a</b> <sup>b</sup> | <b>L6-b</b> <sup>b</sup> | <b>L6D</b> <sup>b</sup> |
|-----------------------|------------------------|--------------------------|--------------------------|-------------------------|
| <b>N-H bending</b>    | 1582/1540 <sup>a</sup> |                          |                          |                         |
| <b>C=O stretching</b> | 1641 <sup>a</sup>      | 1706/1700 <sup>a</sup>   | 1690 <sup>a</sup>        | 1639 <sup>a</sup>       |
| <b>C=N stretching</b> | 1250/1315 <sup>a</sup> | 1500 <sup>a</sup>        | 1520 <sup>a</sup>        | 1305 <sup>a</sup>       |
| <b>N-H stretching</b> | 2600-                  | 3485/3499 <sup>a</sup>   | 3250 <sup>a</sup>        | 3075 <sup>a</sup>       |
| <b>O-H stretching</b> | 3150 <sup>a</sup>      |                          | 3613 <sup>a</sup>        | 3095 <sup>a</sup>       |

**Supplementary Table 18.** Calculated and experimental vibrations. <sup>a</sup> Vibrations are given in cm<sup>-1</sup>. <sup>b</sup> DFT calculations were ran with M06L/TZVP and scaled by a factor of 0,9500. <sup>7,8</sup>

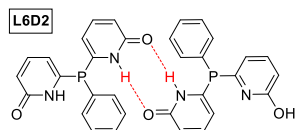

**Figure 40.** Hypothetical structure of the **L6D2** dimer.

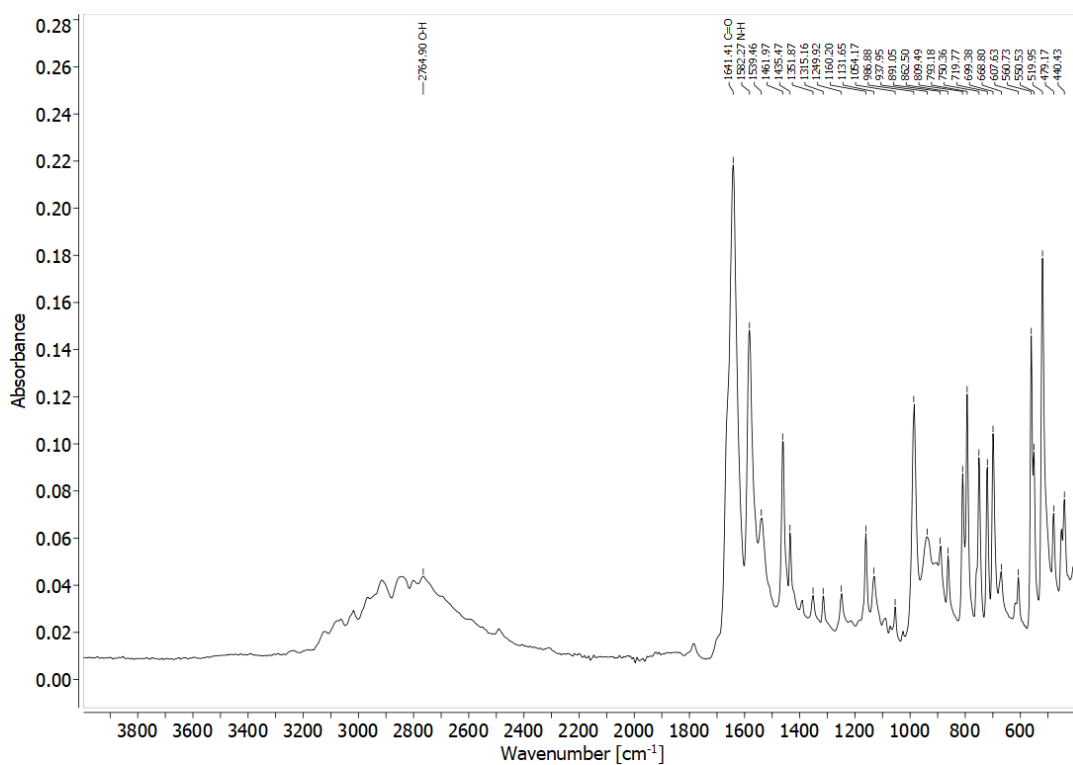

**Supplementary Figure 41.** ATR IR spectrum of **L6**, at room temperature.

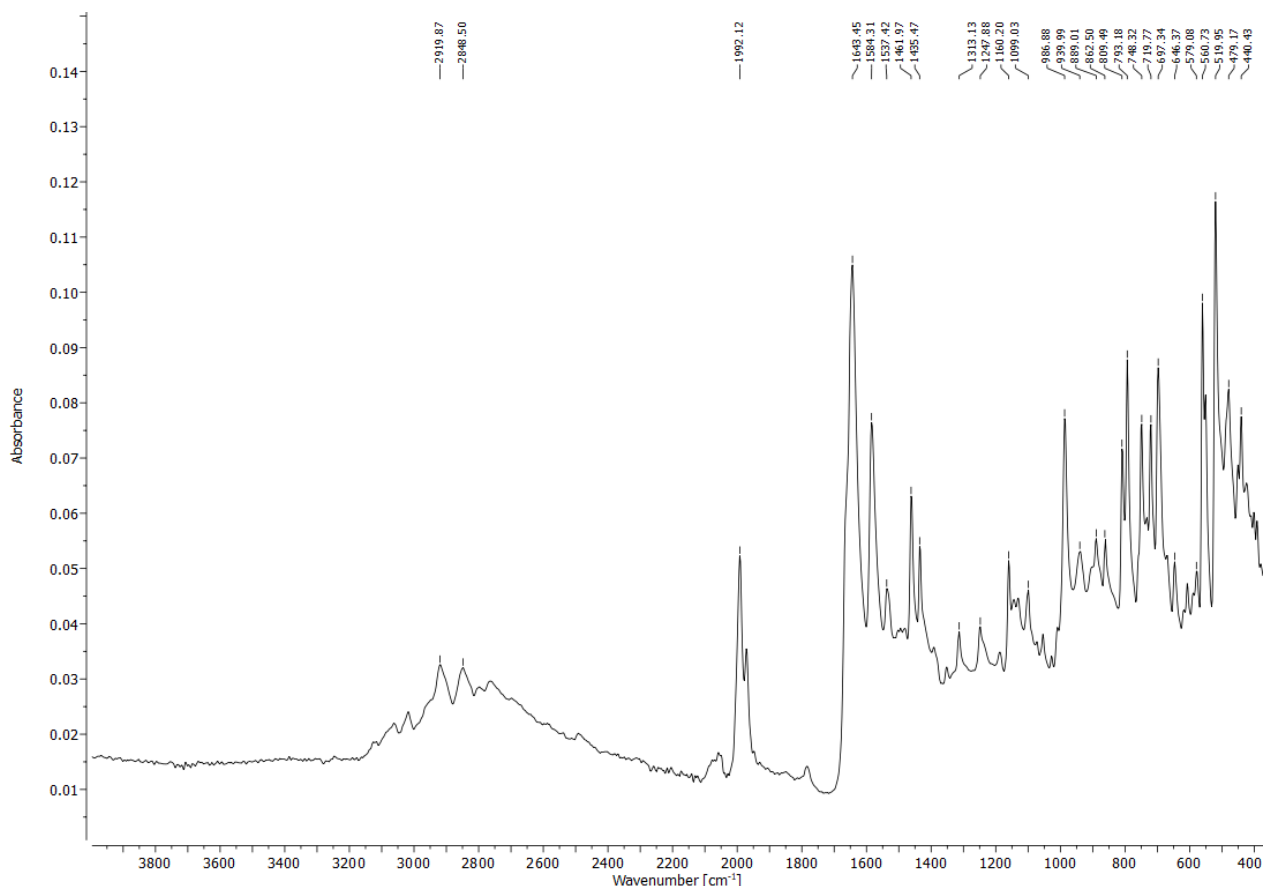

**Supplementary Figure 42.** ATR IR spectrum of the [Rh(L6D)(CO)Cl]

1. J. Joseph and E. D. Jemmis, *J Am Chem Soc*, 2007, **129**, 4620-4632.
2. A. A. Howard, G. S. Tschumper and N. I. Hammer, *J Phys Chem A*, 2010, **114**, 6803-6810.
3. U. Gellrich, J. Huang, W. Seiche, M. Keller, M. Meuwly and B. Breit, *J Am Chem Soc*, 2011, **133**, 964-975.
4. M. E. Benmalti, A. Krallafa, N. Rekik and M. Belhakem, *Spectrochim Acta A*, 2009, **74**, 58-66.
5. H. I. Abdulla and M. F. El-Bermani, *Spectrochim Acta A*, 2001, **57**, 2659-2671.
6. M. Chevrier, O. Bensaude, J. Guillerez and J. E. Dubois, *Tetrahedron Lett*, 1980, **21**, 3359-3362.
7. J. L. B. S. Kanchanakungwankul, J. Zheng, I. M. Alecu, B. J. Lynch, Y. Zhao, and D. G. Truhlar, Database of Frequency Scale Factors for Electronic Model Chemistries, [https://comp.chem.umn.edu/freqscale/210722\\_Database\\_of\\_Freq\\_Scale\\_Factors\\_v5.pdf](https://comp.chem.umn.edu/freqscale/210722_Database_of_Freq_Scale_Factors_v5.pdf), (accessed 17/08/2023, 2023).
8. K. K. Irikura, R. D. Johnson and R. N. Kacker, *J Phys Chem A*, 2005, **109**, 8430-8437.
9. F. Bauer, N. Dierenbach and B. Breit, *Asian J Org Chem*, 2023.

## SI-I: Addendum to the scope : unreacted olefins

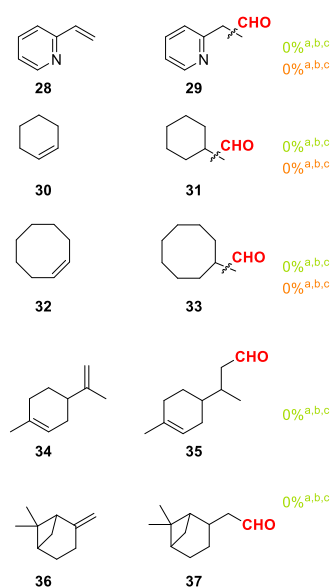

**Supplementary Table 18.** Rh/**L6**-catalysed hydroformylation of diverse olefins. All shown yields are isolated yields. The regioselectivity is determined by NMR. Displayed in green are the results of the Rh/**L6** system, in orange the ones obtained applying Rh/**L1** (6-DPPON).

Conditions: olefin (6.0 mmol), [Rh(CO)<sub>2</sub>acac] (0.014 mol%), monodentate ligand (0.071 mol%), CO:H<sub>2</sub> (10 bar, 1:1), toluene (4.3 mL), 120 °C, 4 h. <sup>a</sup> CO:H<sub>2</sub> (30 bar, 1:1) <sup>b</sup> monodentate ligand (0.142 mol%) <sup>c</sup> monodentate ligand (0.284 mol%).

## SI-J: NMR attribution and spectra of hydroformylation products

### Nonanal (2a) and 2-methyloctanal (2b):

**(2a)**  $^1\text{H}$  NMR (300 MHz,  $\text{CDCl}_3$ )  $\delta$  9.69 (td,  $J = 1.9, 0.6$  Hz, 1H), 2.35 (td,  $J = 7.4, 1.9$  Hz, 2H), 1.71 – 1.48 (m, 2H), 1.32 – 1.21 (m, 9H), 0.92 – 0.66 (m, 3H).

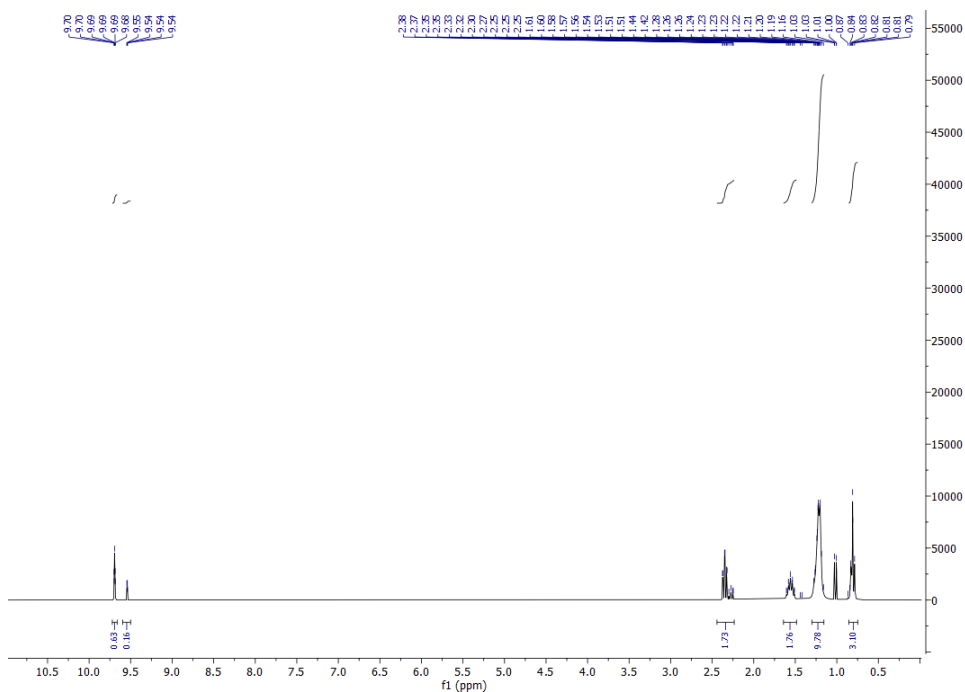

**(2a)**  $^{13}\text{C}$  NMR (75 MHz,  $\text{CDCl}_3$ )  $\delta$  202.96, 43.91, 31.78, 29.30, 29.16, 29.08, 22.62, 22.08, 14.06.

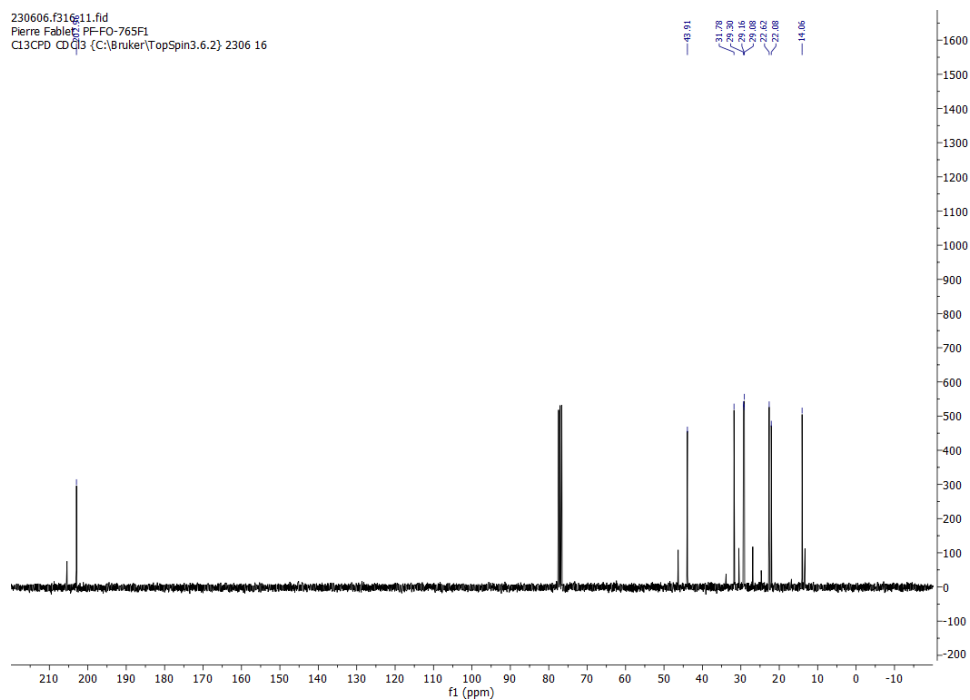

### Tridecanal (5a) and 2-methyldodecanal (5b):

**(5a)**  $^1\text{H}$  NMR (300 MHz,  $\text{CDCl}_3$ )  $\delta$  9.69 (t,  $J = 1.9$  Hz, 1H), 2.35 (td,  $J = 7.4, 1.9$  Hz, 2H), 1.66 – 1.49 (m, 2H), 1.30 – 1.19 (m, 18H), 0.86 – 0.78 (m, 3H).

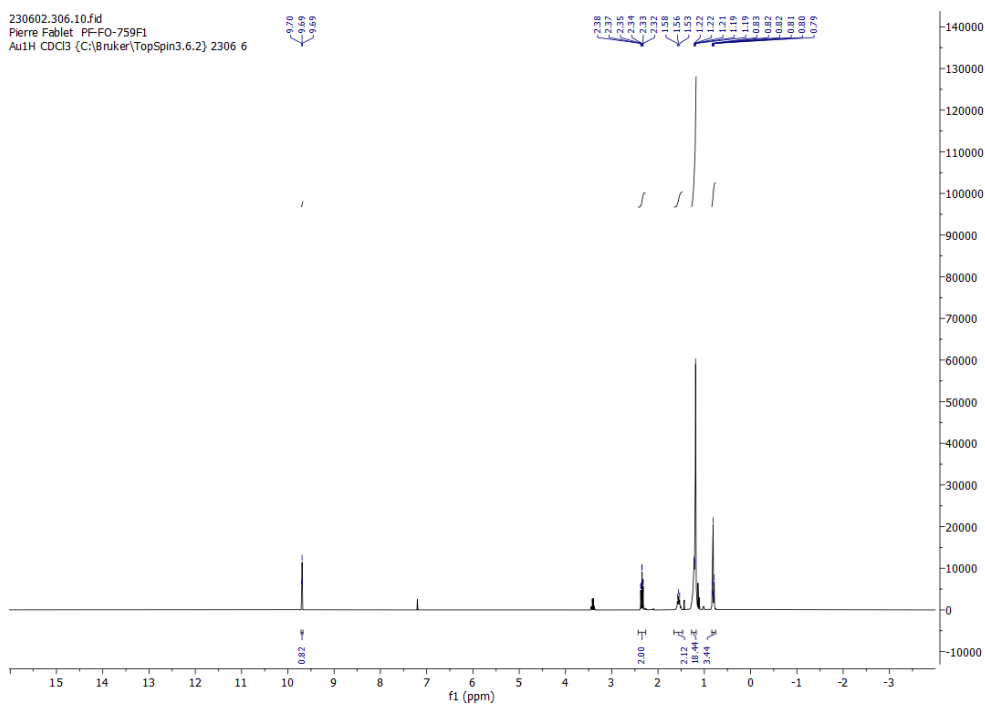

**(5a)**  $^{13}\text{C}$  NMR (75 MHz,  $\text{CDCl}_3$ )  $\delta$  202.95, 43.92, 31.92, 29.64, 29.63, 29.58, 29.43, 29.36, 29.35, 29.17, 22.69, 22.09, 14.11.

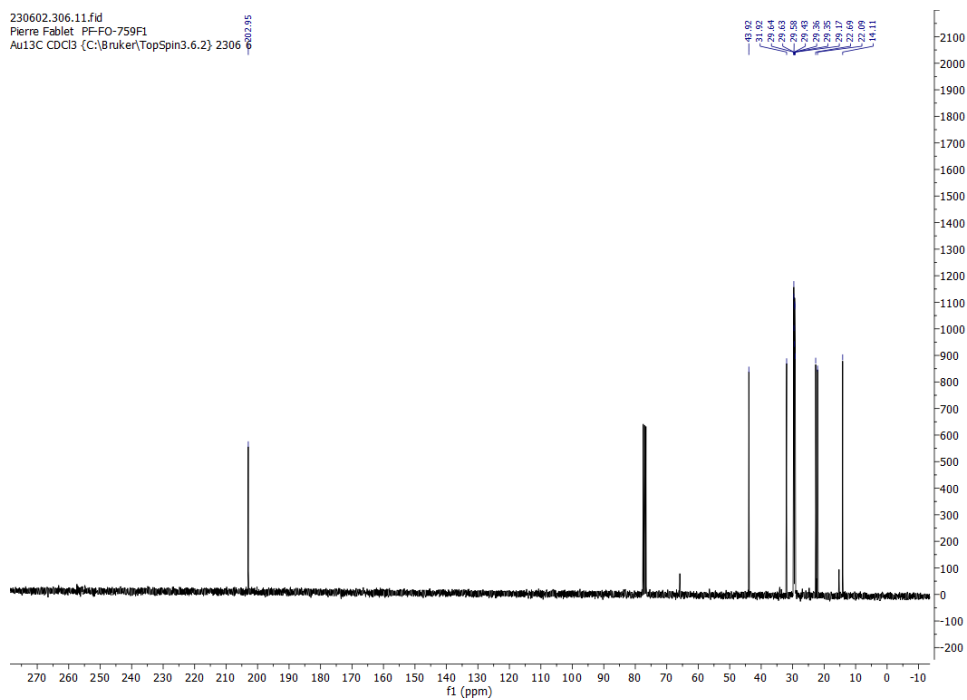

### 3-phenylpropanal (7a) and 2-phenylpropanal (7b):

**(7a)**  $^1\text{H}$  NMR (300 MHz,  $\text{CDCl}_3$ )  $\delta$  9.85 (t,  $J$  = 1.4 Hz, 1H), 7.30 – 7.02 (m, 5H), 2.99 (ddt,  $J$  = 8.2, 7.1, 0.6 Hz, 2H), 2.88 – 2.67 (m, 2H).

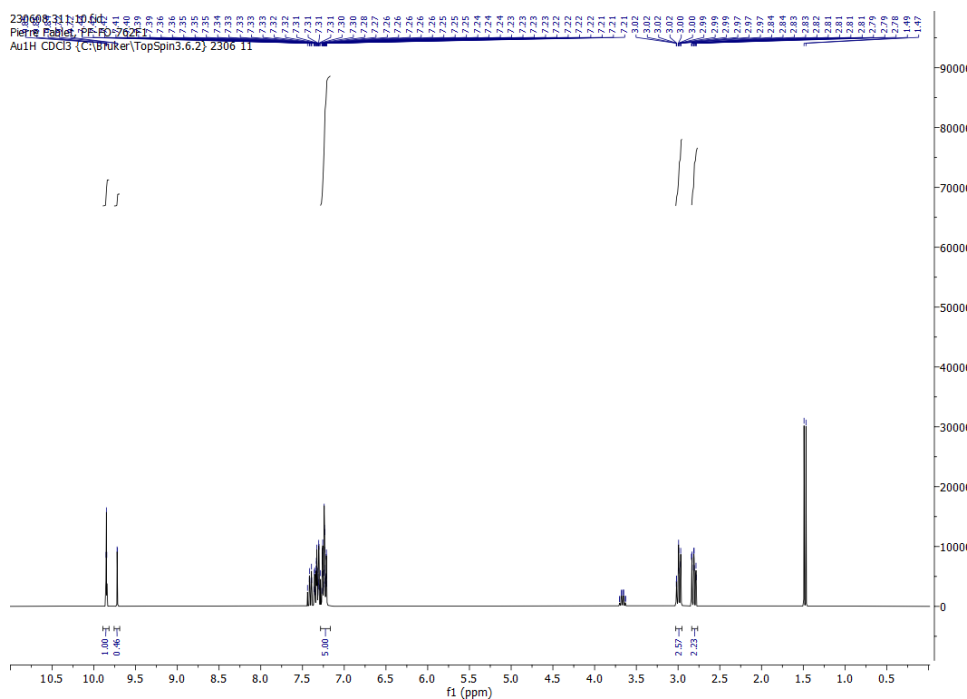

**(7a)**  $^{13}\text{C}$  NMR (75 MHz,  $\text{CDCl}_3$ )  $\delta$  201.60, 140.36, 129.11, 128.63, 128.35, 127.56, 126.33, 45.30, 28.14.

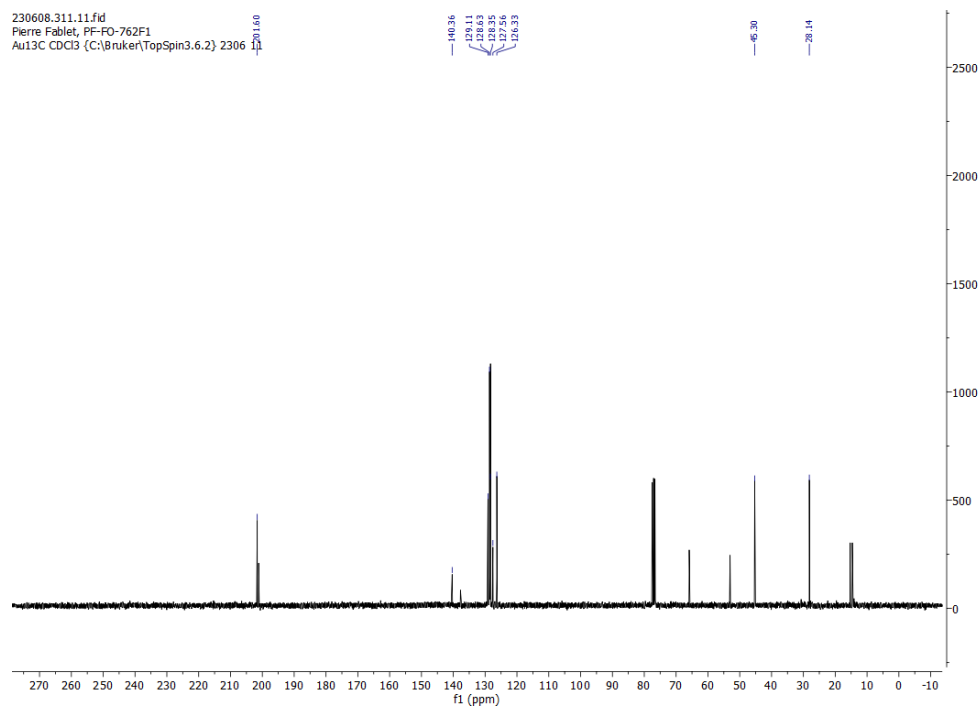

#### 4-phenylbutanal (9a) and 2-methyl-3-phenylpropanal (9b):

**(9a)**  $^1\text{H}$  NMR (300 MHz,  $\text{CDCl}_3$ )  $\delta$  9.79 (t,  $J = 1.6$  Hz, 1H), 7.37 – 7.13 (m, 5H), 2.69 (dd,  $J = 8.2, 6.9$  Hz, 2H), 2.48 (td,  $J = 7.3, 1.6$  Hz, 2H), 2.08 – 1.92 (m, 2H).

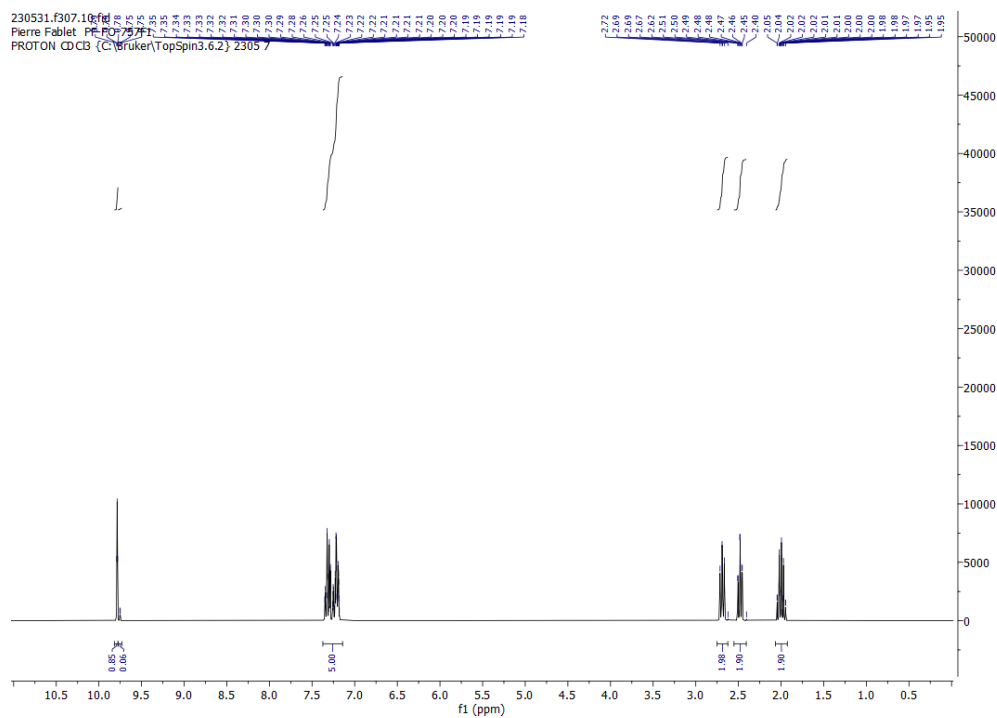

**(9a)**  $^{13}\text{C}$  NMR (75 MHz,  $\text{CDCl}_3$ )  $\delta$  202.31, 141.23, 128.48, 126.12, 43.15, 35.02, 23.66.

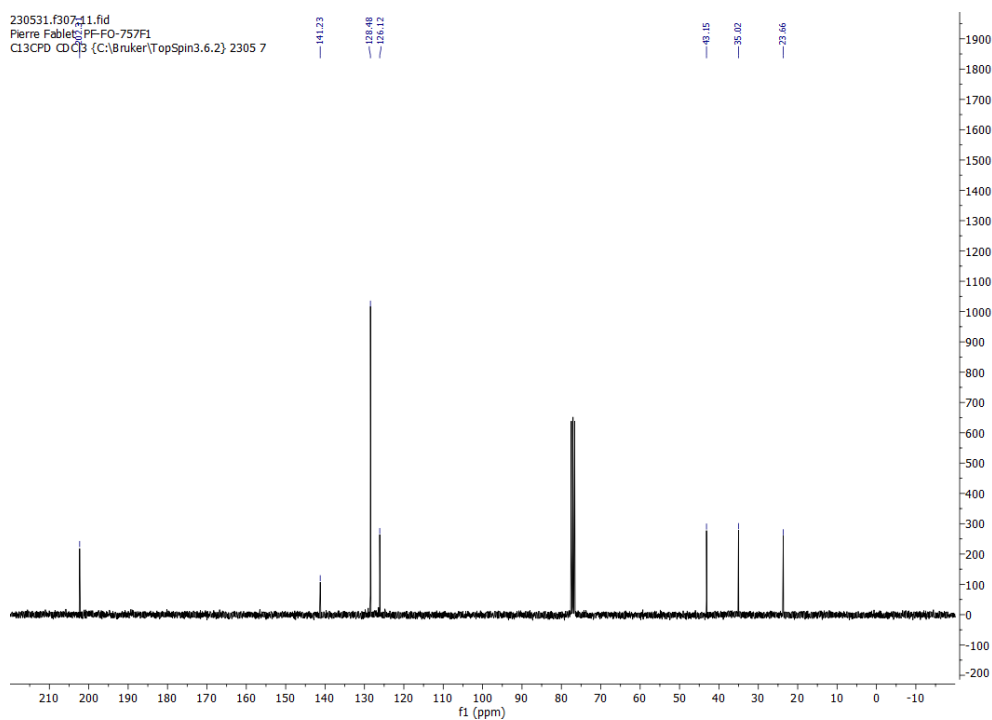

### 3-(4-methoxyphenyl)propanal (11a) and 2-(4-methoxyphenyl)propanal (11b):

**(11a)** <sup>1</sup>H NMR (300 MHz, CDCl<sub>3</sub>) δ 9.83 (t, J = 1.5 Hz, 1H), 6.99 – 6.80 (m, 4H), 3.81 (s, 3H), 3.02 – 2.54 (m, 4H).

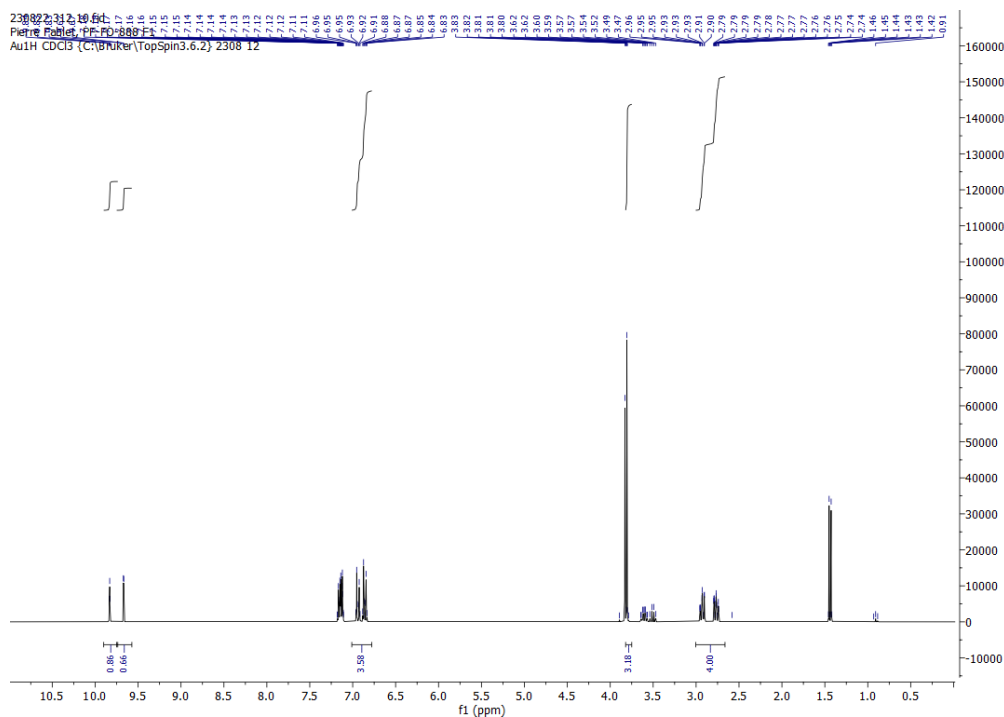

**(11a)** <sup>13</sup>C NMR (75 MHz, CDCl<sub>3</sub>) δ 201.83, 158.11, 132.35, 129.25, 114.52, 114.02, 55.28, 45.56, 27.29.

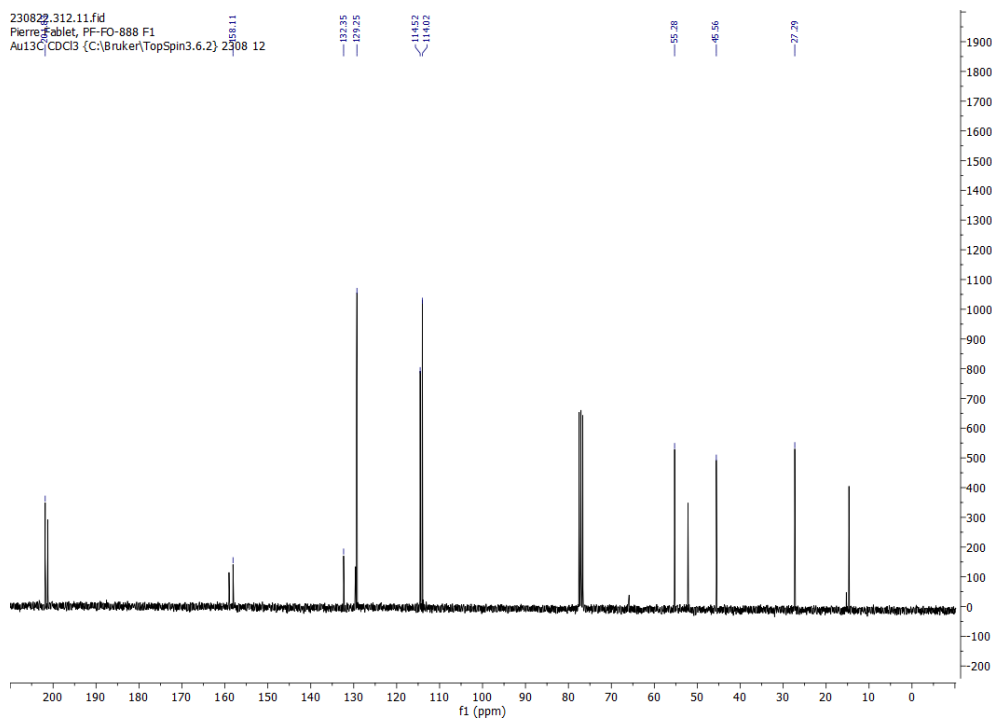

### 3-(cyclohex-3-en-1-yl)propanal (13a) and 2-(cyclohex-3-en-1-yl)propanal (13b):

**(13a)** <sup>1</sup>H NMR (300 MHz, CDCl<sub>3</sub>) δ 9.72 (t, J = 1.8 Hz, 1H), 5.83 – 5.21 (m, 2H), 2.40 (ddd, J = 8.0, 7.0, 1.9 Hz, 2H), 2.02 – 1.88 (m, 2H), 1.74 – 1.38 (m, 6H), 1.17 (dddd, J = 12.7, 10.2, 8.7, 7.4 Hz, 1H).

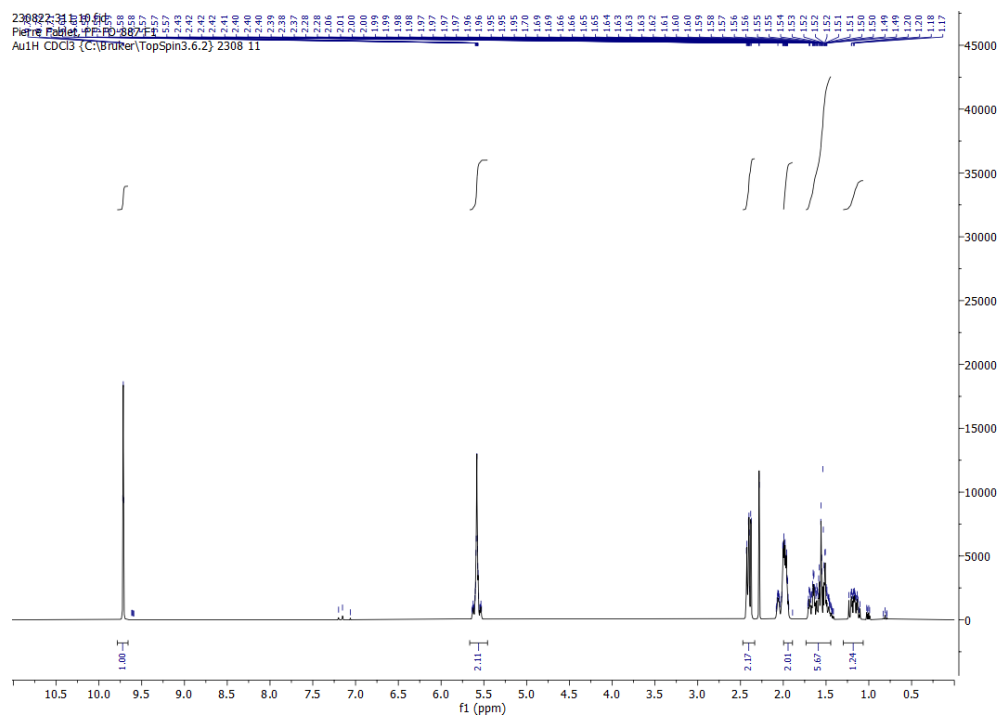

**(13a)** <sup>13</sup>C NMR (75 MHz, CDCl<sub>3</sub>) δ 202.84, 127.06, 126.04, 41.56, 33.10, 31.55, 28.61, 25.06.

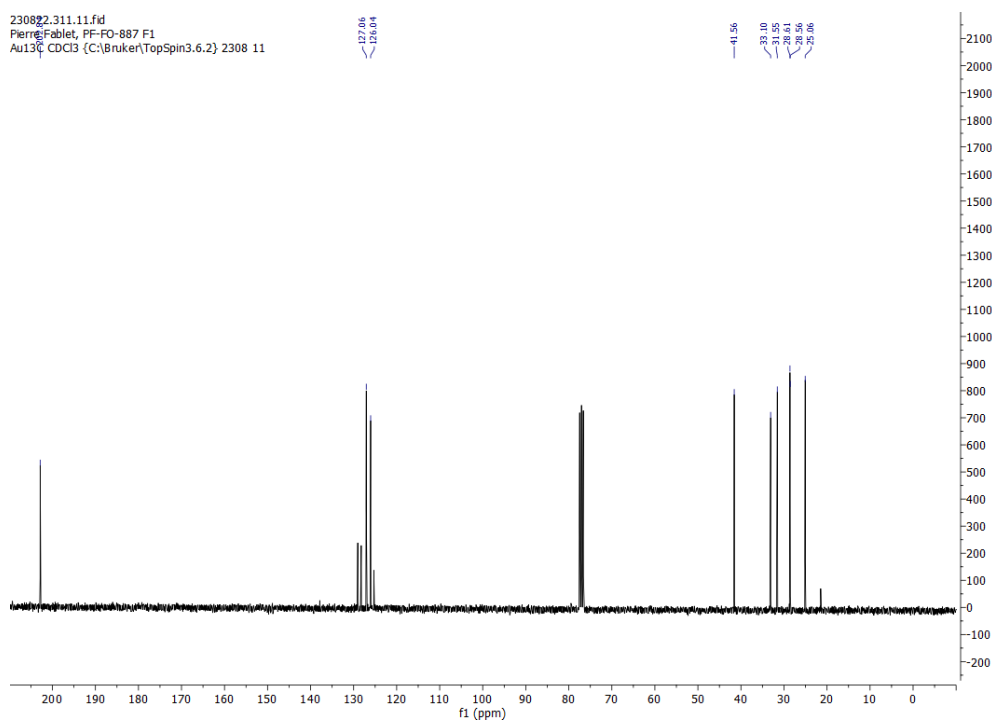

### Norbornane-2-carboxaldehyde (15):

(15)  $^1\text{H}$  NMR (300 MHz,  $\text{CDCl}_3$ )  $\delta$  9.56 (d,  $J = 1.6$  Hz, 1H), 2.55 – 2.44 (m, 1H), 2.34 – 2.20 (m, 2H), 1.90 – 1.78 (m, 1H), 1.64 – 1.39 (m, 4H), 1.33 – 1.16 (m, 3H).

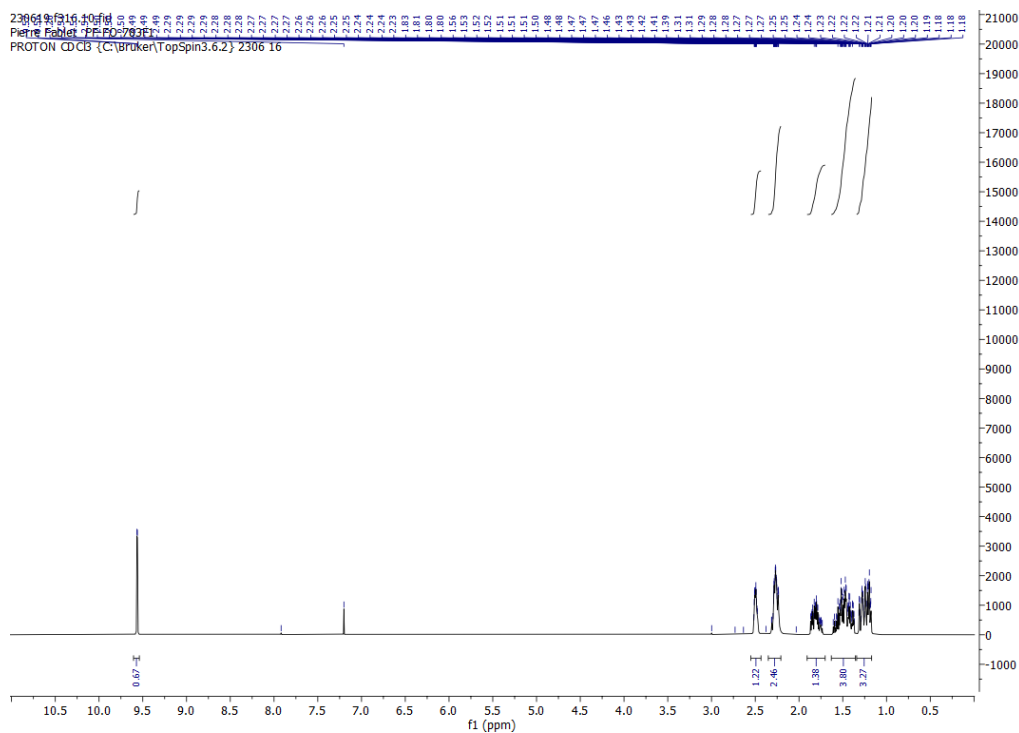

(15)  $^{13}\text{C}$  NMR (75 MHz,  $\text{CDCl}_3$ )  $\delta$  203.42, 54.60, 40.91, 38.14, 36.19, 34.06, 30.21, 29.06.

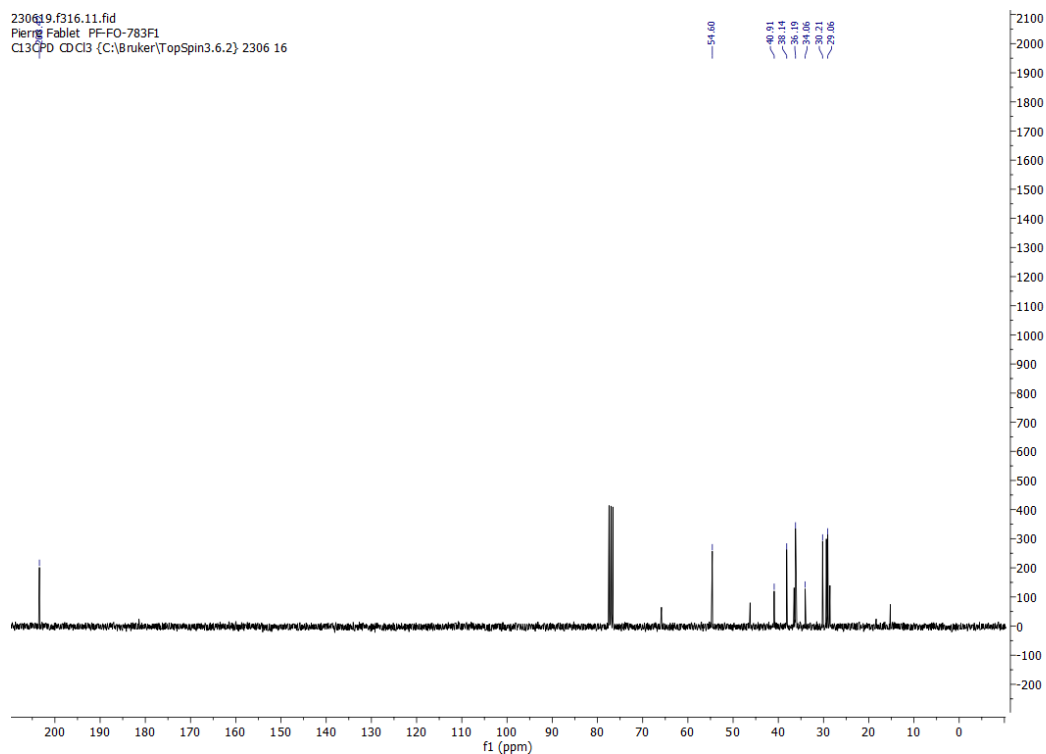

### 3-(1,3-dioxolan-2-yl)propanal (17a) and 2-(1,3-dioxolan-2-yl)propanal (17b):

**(17a)**  $^1\text{H}$  NMR (300 MHz,  $\text{CDCl}_3$ )  $\delta$  9.69 (t,  $J$  = 1.7 Hz, 1H), 4.90 (t,  $J$  = 3.9 Hz, 1H), 3.86 (ddd,  $J$  = 8.1, 3.8, 1.7 Hz, 2H), 3.81 – 3.72 (m, 2H), 2.47 (td,  $J$  = 7.1, 1.7 Hz, 2H), 1.98 (td,  $J$  = 7.1, 3.9 Hz, 2H).

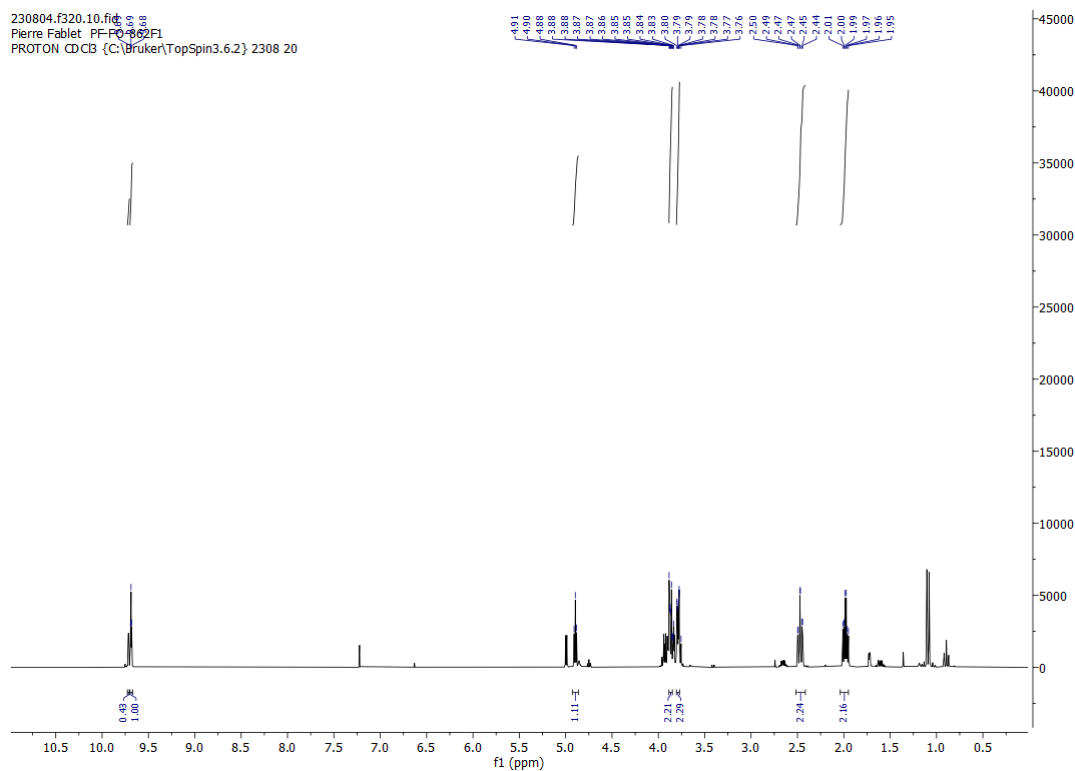

**(17a)**  $^{13}\text{C}$  NMR (75 MHz,  $\text{CDCl}_3$ )  $\delta$  201.70, 102.93, 65.05, 37.59, 26.26.

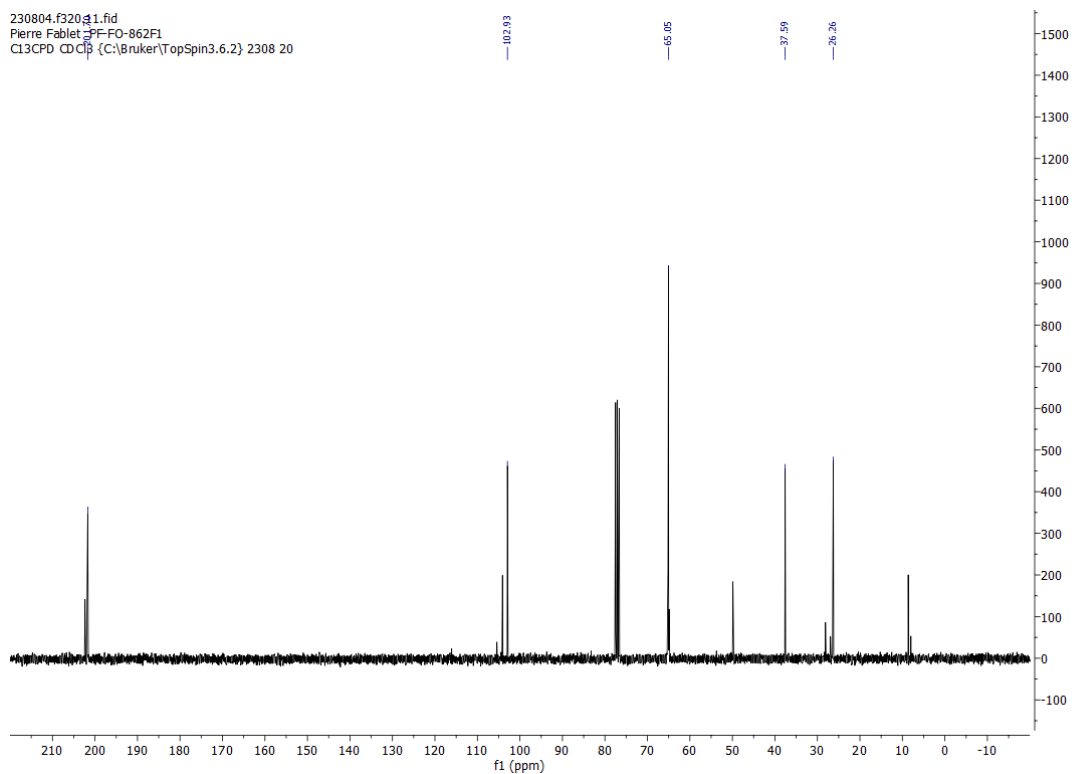

#### 4-oxobutyl methacrylate (19a) and 2-methyl-3-oxopropyl methacrylate (19b):

**(19a)** <sup>1</sup>H NMR (300 MHz, CDCl<sub>3</sub>) δ 9.73 (t, J = 1.5 Hz, 1H), 6.02 (m, 1H), 5.51 (m, 1H), 4.12 (t, J = 6.5 Hz, 2H), 2.50 (dt, J = 7.0, 1.5 Hz, 2H), 1.96 (p, J = 6.5 Hz, 2H), 1.87 (m, 3H).

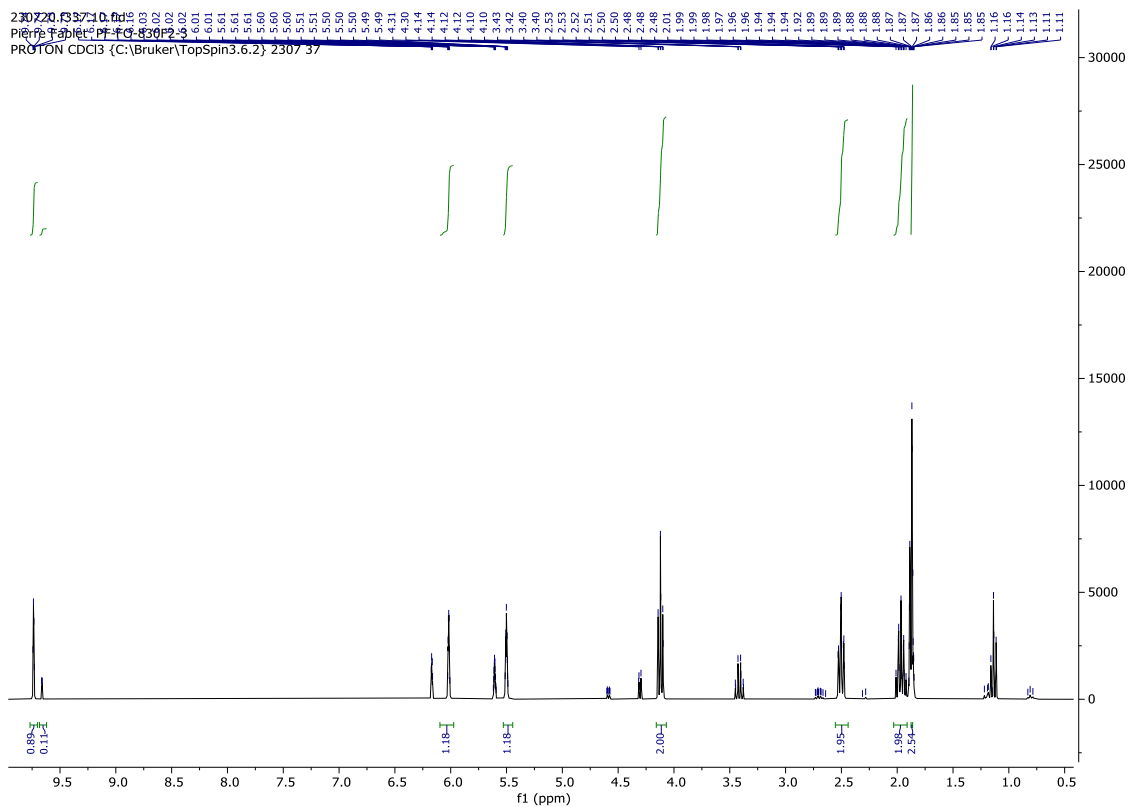

**(19a)** <sup>13</sup>C NMR (75 MHz, CDCl<sub>3</sub>) δ 201.9, 167.3, 136.2, 125.7, 63.7, 40.6, 21.4, 18.3.

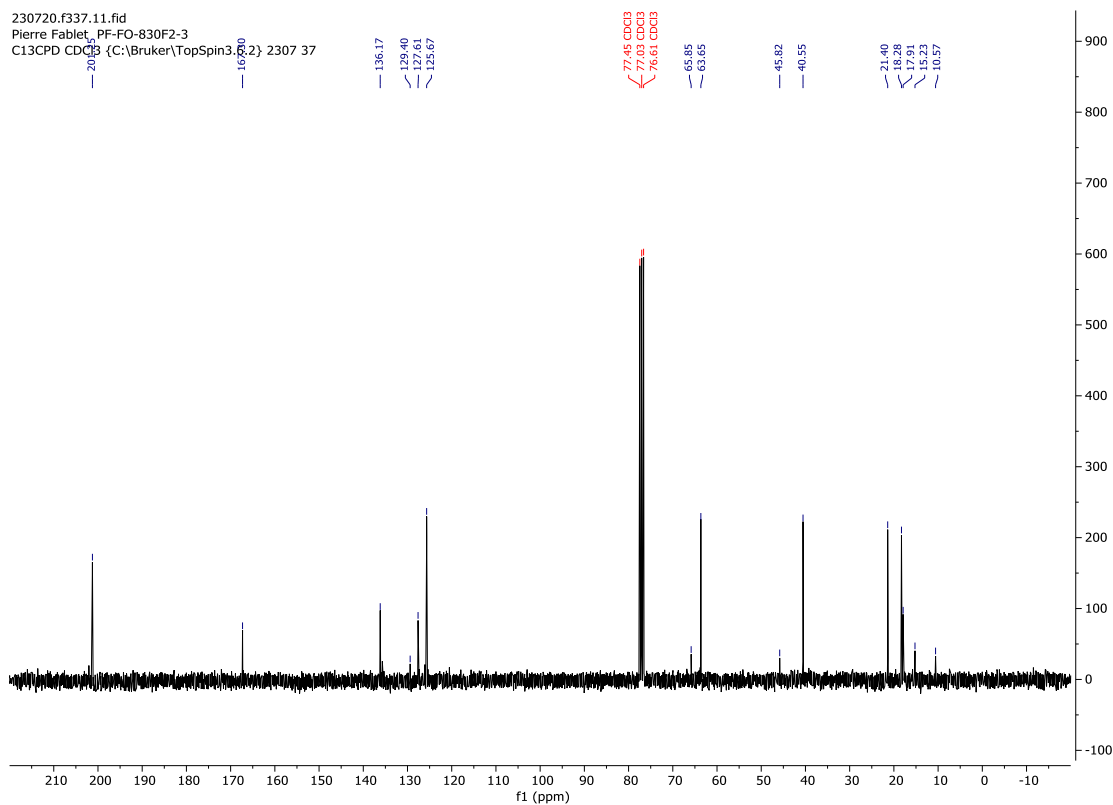

**non-8-enal (21a) and 2-methyloct-7-enal (21b):**

**(21a)** <sup>1</sup>H NMR (300 MHz, CDCl<sub>3</sub>) δ 9.69 (q, J = 1.8 Hz, 1H), 7.14 – 7.03 (m, 1H), 5.47 – 5.21 (m, 2H), 2.35 (tt, J = 7.4, 2.1 Hz, 2H), 2.04 – 1.83 (m, 2H), 1.68 – 1.39 (m, 4H), 1.39 – 1.19 (m, 4H).

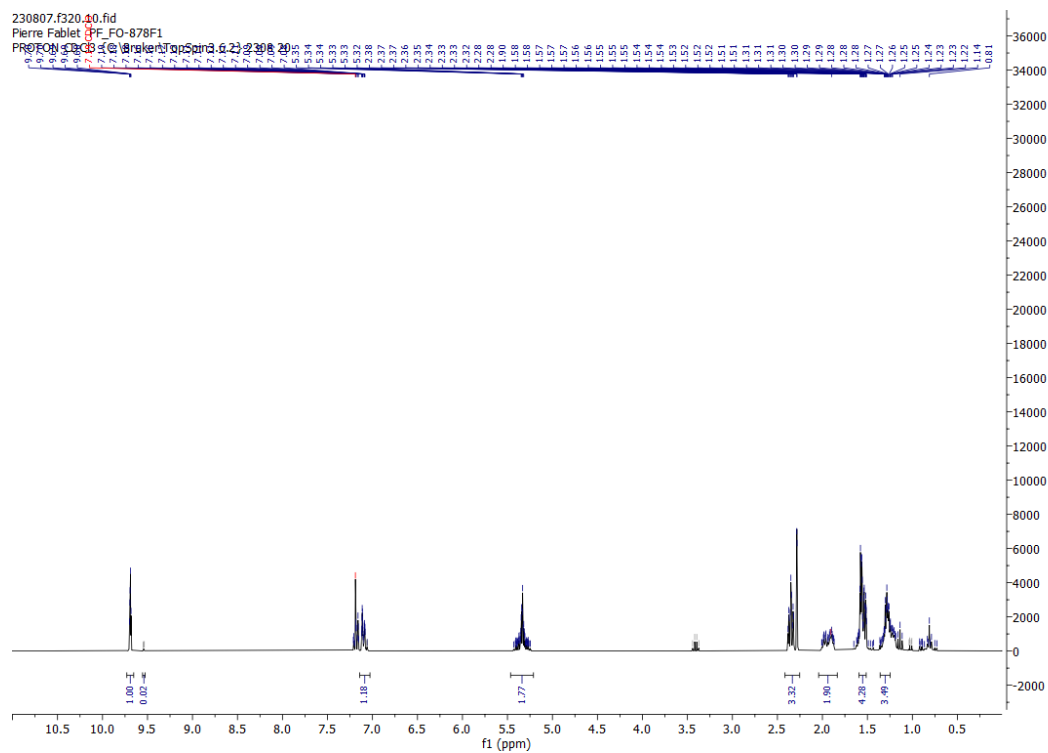

**(21a)** <sup>13</sup>C NMR (75 MHz, CDCl<sub>3</sub>) δ 202.88, 131.16, 124.99, 43.89, 32.33, 29.27, 28.64, 26.58, 21.97.

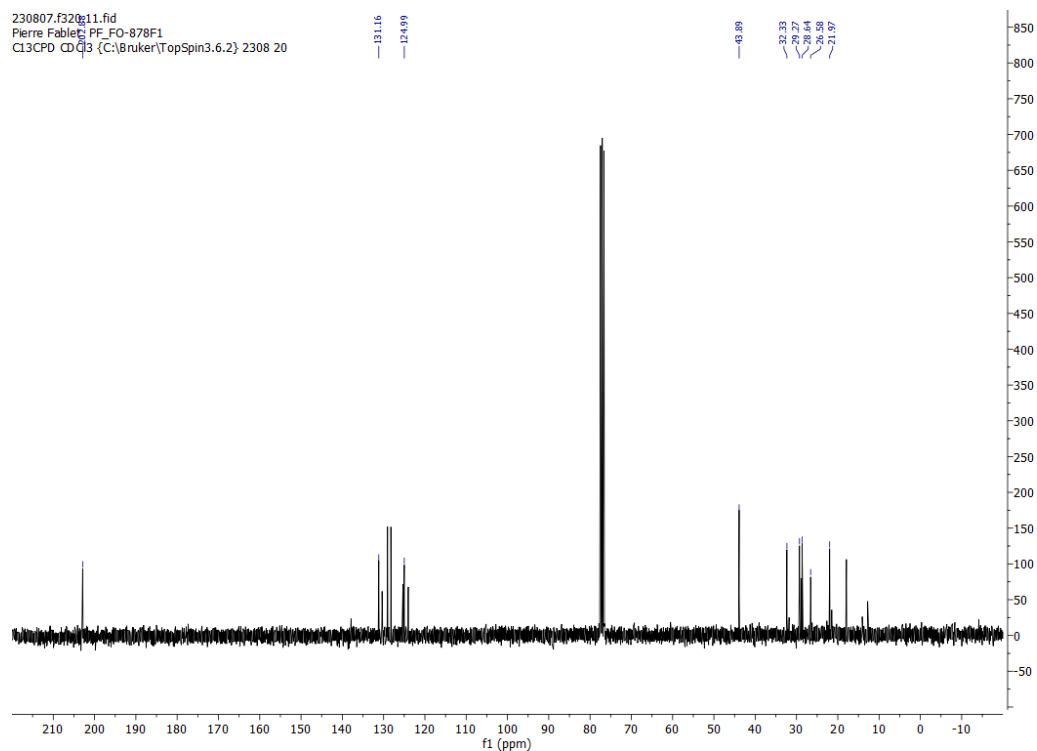

### Decanediol (22):

(22) <sup>1</sup>H NMR (300 MHz, CDCl<sub>3</sub>) δ 9.76 (td, J = 1.8, 0.5 Hz, 1H), 2.42 (td, J = 7.3, 1.8 Hz, 2H), 1.61 (q, J = 7.3 Hz, 3H), 1.31 (s, 5H).

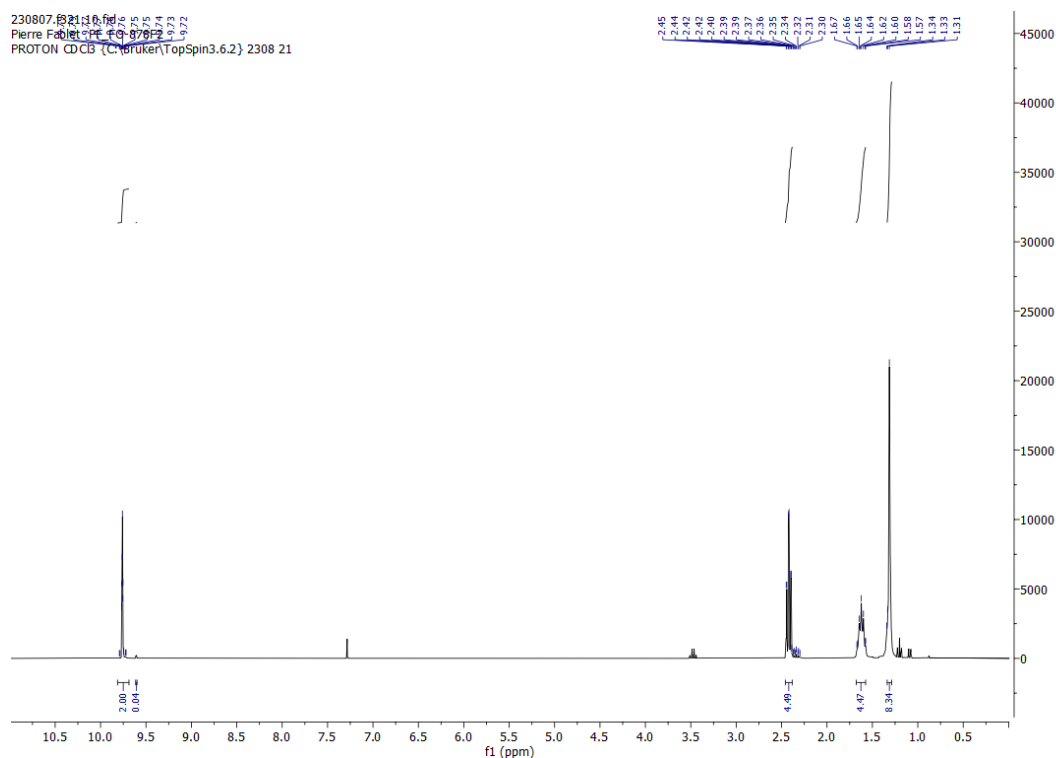

(22) <sup>13</sup>C NMR (75 MHz, CDCl<sub>3</sub>) δ 202.83, 43.85, 29.10, 29.03, 21.99.

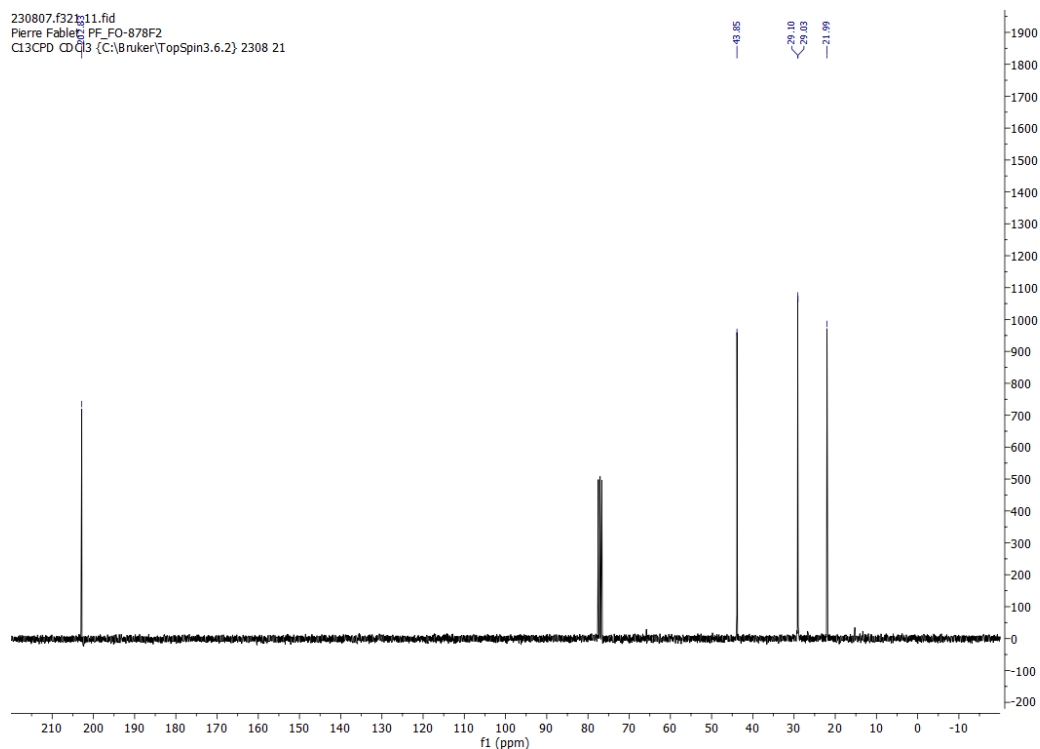

### undec-10-enal (**24a**) and 2-methyldec-9-enal (**24b**):

**(24a)**  $^1\text{H}$  NMR (300 MHz,  $\text{CDCl}_3$ )  $\delta$  9.69 (t,  $J = 1.8$  Hz, 1H), 5.46 – 5.22 (m, 2H), 2.35 (tdd,  $J = 7.4, 1.9, 1.0$  Hz, 2'H), 2.02 – 1.82 (m, 2H), 1.66 – 1.46 (m, 3H), 1.39 – 1.08 (m, 10H).

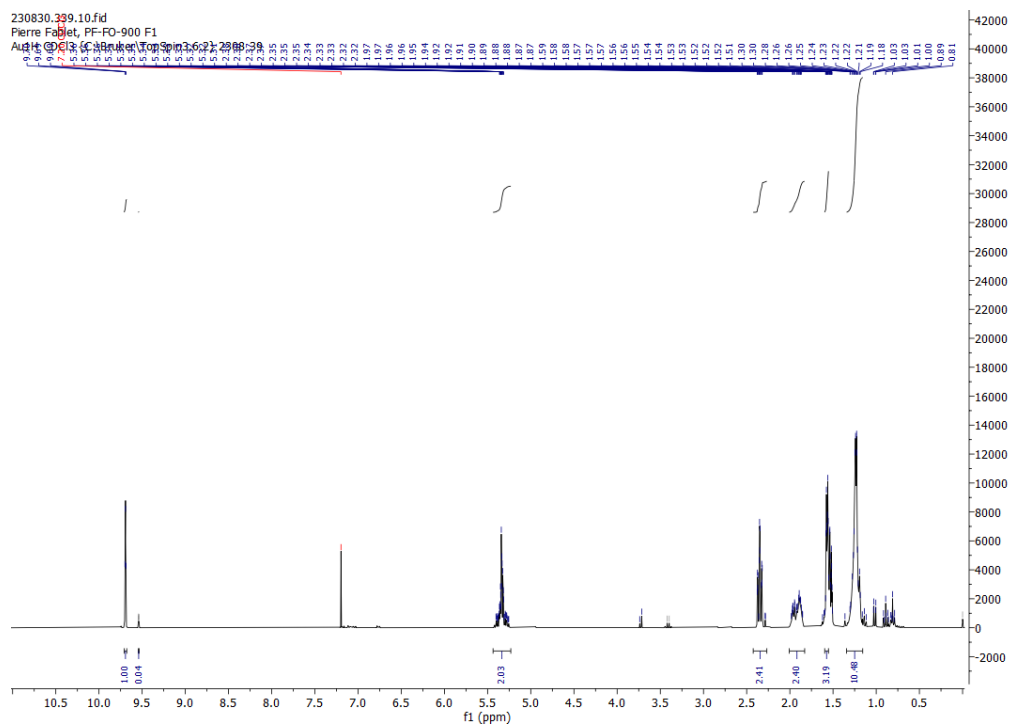

**(24a)**  $^{13}\text{C}$  NMR (75 MHz,  $\text{CDCl}_3$ )  $\delta$  202.96, 131.51, 124.68, 43.92, 32.54, 29.50, 29.22, 29.13, 28.92, 22.07, 17.93.

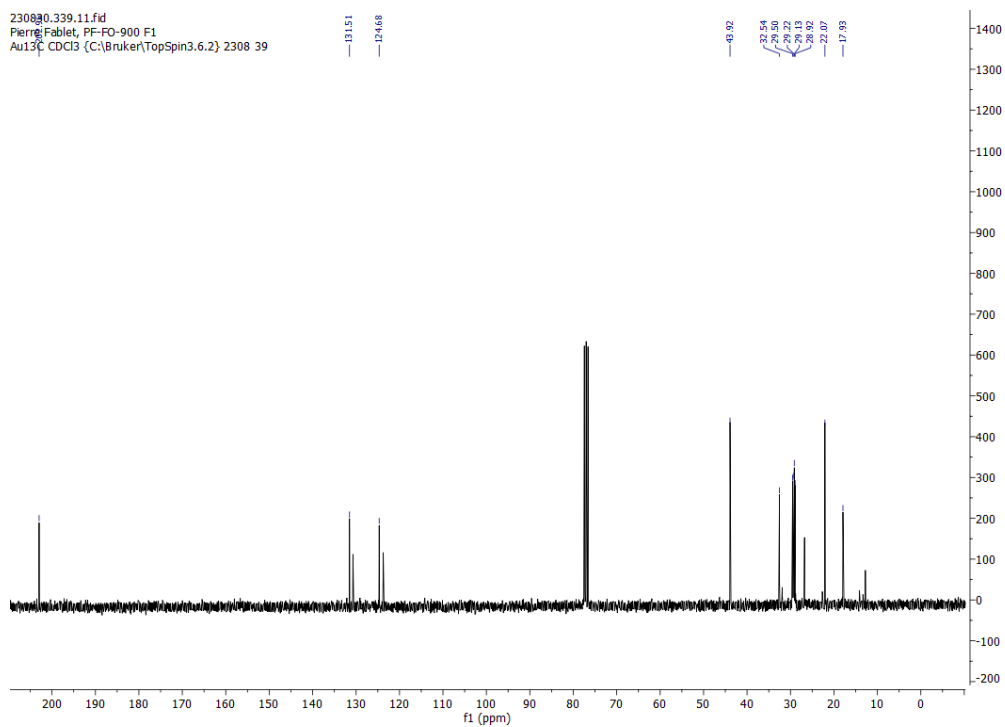

### dodecanedial (**25**):

**(25)** <sup>1</sup>H NMR (300 MHz, CDCl<sub>3</sub>) δ 9.70 (t, J = 1.9 Hz, 1H), 2.35 (td, J = 7.3, 1.9 Hz, 2H), 1.56 (dd, J = 9.2, 5.4 Hz, 3H), 1.30 – 1.17 (m, 9H).

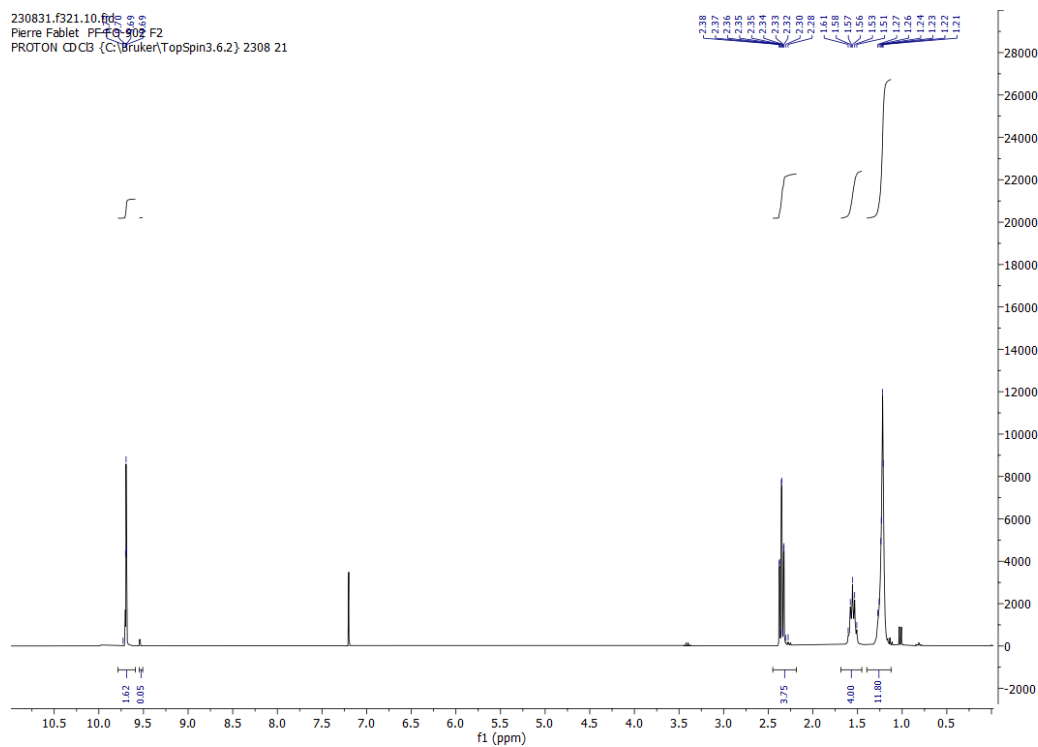

**(25)** <sup>13</sup>C NMR (75 MHz, CDCl<sub>3</sub>) δ 202.94, 43.90, 29.31, 29.13, 22.06.

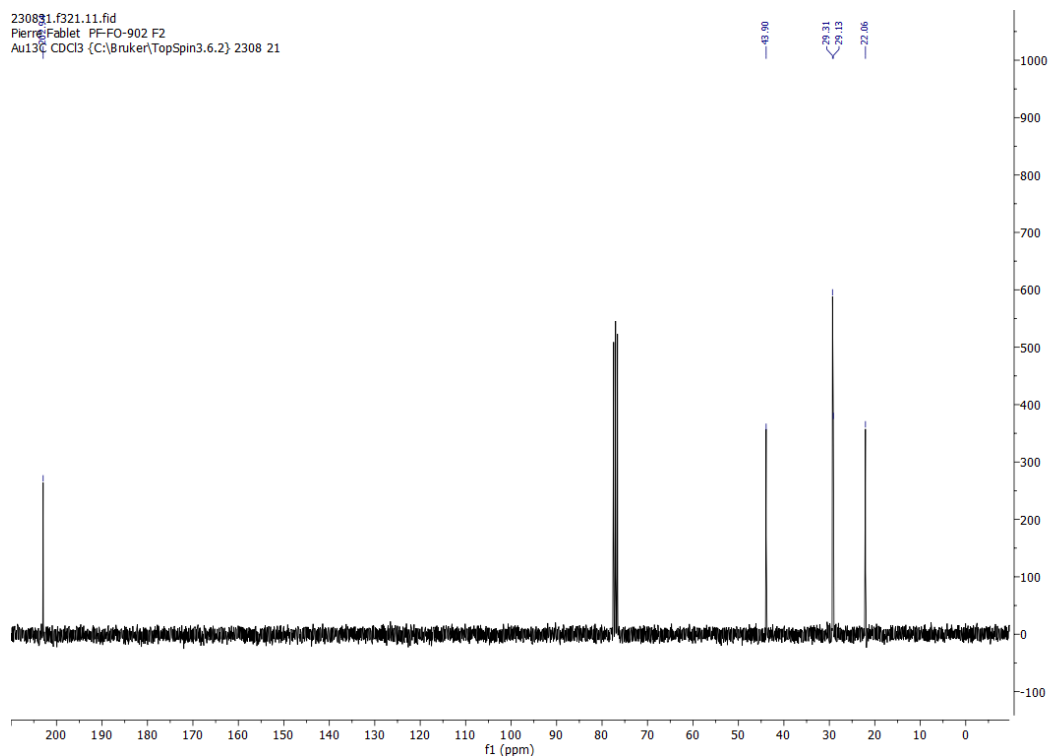

**4-(4-hydroxy-3-methoxyphenyl)butanal (27a) and 3-(4-hydroxy-3-methoxyphenyl)-2-methylpropanal (27b):**

**(27a)**  $^1\text{H}$  NMR (300 MHz,  $\text{CDCl}_3$ )  $\delta$  9.68 (t,  $J = 1.6$  Hz, 1H), 6.80 – 6.71 (m, 1H), 6.64 – 6.53 (m, 2H), 3.80 (s, 3H), 2.51 (dd,  $J = 8.3, 6.9$  Hz, 2H), 2.37 (td,  $J = 7.3, 1.6$  Hz, 2H), 1.93 – 1.77 (m, 2H).

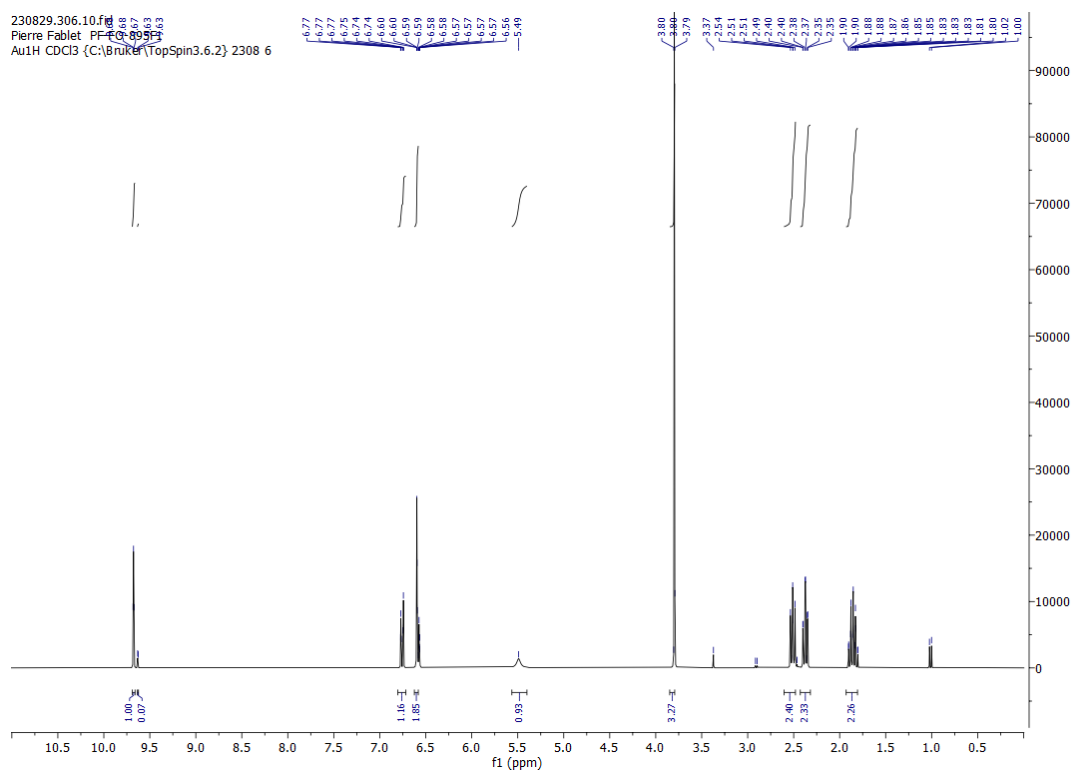

**(27a)**  $^{13}\text{C}$  NMR (75 MHz,  $\text{CDCl}_3$ )  $\delta$  202.52, 146.49, 143.92, 133.15, 121.04, 114.29, 110.99, 55.90, 43.13, 34.71, 23.93.

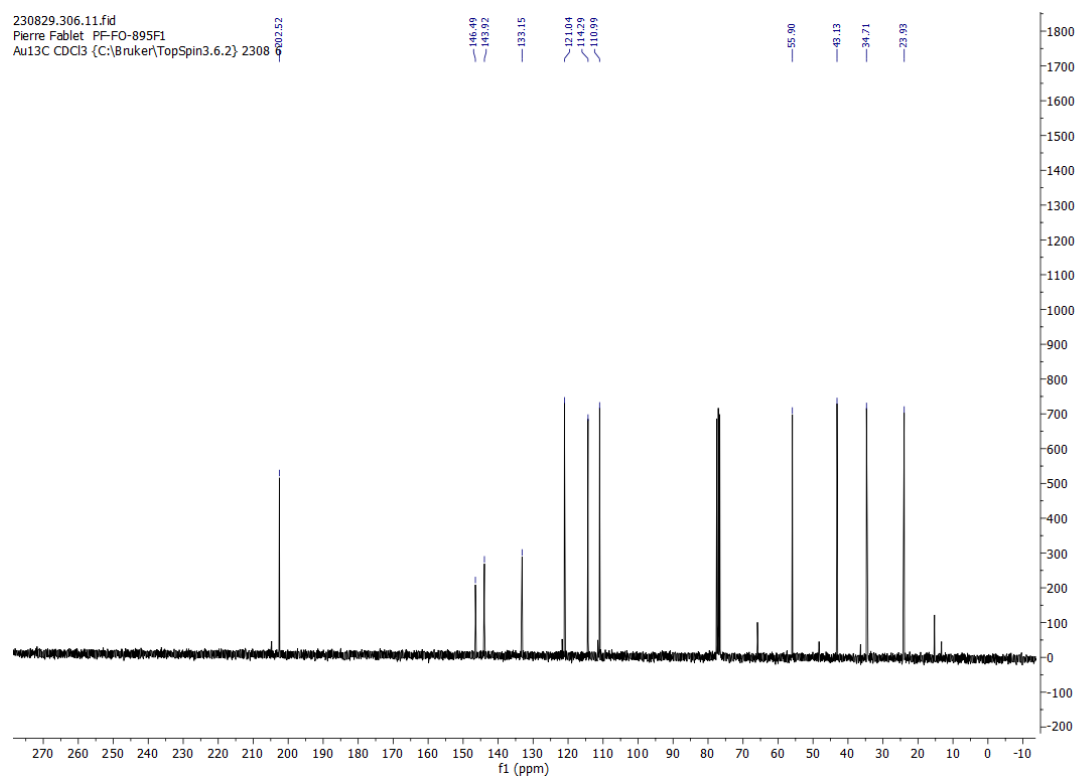

Supplement: d4ob00714j1.pdf [file d4ob00714j1.pdf]
